# Supplementary material
Source: HighWire-hosted journal article supplement (https://drc.bmj.com/content/8/1/e000945)
Supplement: inline-supplementary-material-3 [file inline-supplementary-material-3.xlsx]

## Sheet: Sheet1
Supplementary Table 2. Baseline value for expression of genes and proteins
	Marker			FDRT (n=9)			Non-FDRT (n=9)			P value
MNC Oxidative Stress Genes
NCF1				0.1233 (0.0126)			0.1433 (0.0183)			0.3812
NCF2				0.1097 (0.0087)			0.1318 (0.0155)			0.2312
NCF4				0.0124 (0.0014)			0.0144 (0.0022)			0.4482
CYBB				0.1592 (0.0132)			0.1738 (0.0181)			0.5256
CYBA				0.3537 (0.0125)			0.3611 (0.0366)			0.8499
NRF2				0.0437 (0.0045)			0.0546 (0.0070)			0.2134
GPX3				0.0021 (0.0003)			0.0036 (0.0005)			0.0264
TXNRD1				0.0114 (0.0012)			0.0164 (0.0021)			0.0577
TXN				0.0354 (0.0030)			0.0399 (0.0059)			0.5156
SOD1				0.0388 (0.0061)			0.0512 (0.0132)			0.4039
SOD2				0.1021 (0.0080)			0.1213 (0.0177)			0.3386
MNC Inflammatory Genes
TNFα				0.0082 (0.0008)			0.0097 (0.0006)			0.148
IL-6				0.0010 (0.0001)			0.0024 (0.0006)			0.0397
MCP-1				0.0014 (0.0002)			0.0022 (0.0005)			0.1959
TLR4				0.0483 (0.0038)			0.0538 (0.0077)			0.5357
IL-1β				0.0099 (0.0014)			0.0091 (0.0011)			0.6523
NFκB/p105				0.0085 (0.0016)			0.0106 (0.0025)			0.4948
Rel-A				0.0711 (0.0127)			0.0757 (0.0120)			0.7942
IκB-β				0.0015 (0.0002)			0.0022 (0.0002)			0.0553
IκB-α				0.1028 (0.0065)			0.0952 (0.0054)			0.3939
IL-10				0.0006 (0.00008)			0.0019 (0.0005)			0.0261
TGFβ				0.1812 (0.0090)			0.1695 (0.0106)			0.414
Cytokine level (pg/ml)
Plasma IL-6				0.6863 (0.2430)			0.4333 (0.0482)			0.2966
F2-isoprostane level (pg/ug)*
Plasma F2-isoprostanes				2.609 (0.6198)			2.583 (0.5705)			0.9762
Reduced Glutathione level (µM)
Myotube				0.4790 (0.0660)			0.4634 (0.0141)			0.8232
Adipocyte				0.4390 (0.0487)			0.3142 (0.0878)			0.2492
NRF2 Protein level**
Myotube				5.289 (1.603)			4.500 (1.310)			0.713
Adipocyte				1.306 (0.106)			2.032 (1.266)			0.583
NF-kB Protein level**
Myotube				1.339 (0.250)			0.898 (0.379)			0.361
Adipocyte				0.620 (0.114)			0.941 (0.217)			0.226
Gene expression (2-ΔCT ) & protein level values are means (SEM). Statistical significance was set at P <0.05 using t-test.
*Normalized against arachidonic acid levels
**Western Blot Densitometry Measurements (Arbitrary Units)
