# Supplementary material
Source: HighWire-hosted journal article supplement (https://drc.bmj.com/content/8/1/e000945)
Supplement: inline-supplementary-material-9 [file inline-supplementary-material-9.xlsx]

## Sheet: Gene
Inflammatory gene expression assay data
MNC genes
ID	Group	IL1β_0 min_FCHG	IL1β_120 min_FCHG	IL1β_360 min_FCHG	TNFα_0_FCHG	TNFα_120_FCHG	TNFα_360_FCHG	TLR4_0_FCHG	TLR4_120_FCHG	TLR4_360_FCHG	TGFβ_0_FCHG	TGFβ_120_FCHG	TGFβ_360_FCHG	IL6_0_FCHG	IL6_120_FCHG	IL6_360_FCHG	IL10_0_FCHG	IL10_120_FCHG	IL10_360_FCHG	MCP1_0_FCHG	MCP1_120_FCHG	MCP1_360_FCHG	Rel-A_0_FCHG	Rel-A_120_FCHG	Rel-A_360_FCHG	p105_0_FCHG	p105_120_FCHG	p105_360_FCHG	IkB-α_0_FCHG	IkB-α_120_FCHG	IkB-α_360_FCHG	IkB-β_0_FCHG	IkB-β_120_FCHG	IkB-β_360_FCHG	TNFα_0 min GEXP	IL-6_0 min GEXP	MCP-1_0 min GEXP	TLR4_0 min GEXP	IL-1β_0 min GEXP	NFκB/p105_0 min GEXP	Rel-A_0 min GEXP	IκB-β_0 min GEXP	IκB-α_0 min GEXP	IL-10_0 min GEXP	TGFβ_0 min GEXP
DIET 102	FDRT	1	0.96393	1.1765	1	1.40688	1.23285	1	1.3154	0.937572	1	1.05812	1.08485	1	0.936273	2.26263	1	1.08824	2.62351	1	0.658156	2.16445	1	1.02883	1.10038	1	1.40981	1.17568	1	0.967277	1.16393	1	1.10727	1.55455	0.012833	0.00185161	0.00127305	0.0351094	0.00677999	0.0109267	0.128871	0.00268195	0.079992	0.000973521	0.171407
DIET 103	FDRT	1	0.588046	2.67771	1	1.35614	1.16433	1	0.967276	1.0367	1	1.20039	1.35754	1	0.678067	0.758121	1	1.49744	0.669196	1	0.84998	2.30777	1	1.00312	1.02385	1	0.92916	0.925304	1	0.82131	0.898443	1	0.942131	0.991373	0.00828088	0.000770456	0.00333291	0.053586	0.0102837	0.0168279	0.113873	0.00192557	0.109538	0.000576856	0.15384
DIET 105	FDRT	1	1.10803	1.67134	1	0.983843	2.52888	1	0.764983	1.79067	1	1.03455	0.891929	1	0.471392	19.0934	1	0.623301	25.3779	1	0.590496	19.1995	1	0.896888	1.9099	1	1.04247	1.13918	1	0.844987	0.844401	1	0.654289	3.67438	0.011462	0.00209186	0.00101275	0.0474154	0.00480416	0.0159699	0.118421	0.00289846	0.0929114	0.000875868	0.203698
DIET 106	FDRT	1	1.18633	1.0385	1	2.04983	1.95004	1	1.03994	1.27412	1	0.962928	0.82302	1	5.82598	6.64607	1	3.88927	5.17838	1	2.30058	2.67493	1	1.09202	0.957272	1	1.09923	0.924022	1	1.06992	1.22095	1	1.16594	1.04645	0.00598887	0.000662634	0.00132297	0.0359093	0.00664277	0.00536019	0.0632408	0.00123566	0.0861204	0.000644961	0.196691
DIET 107	FDRT	1	0.692075	1.38607	1	1.35801	2.12874	1	0.861545	1.46866	1	1.34817	1.39668	1	0.596668	1.05373	1	0.991029	1.13682	1	0.527594	1.41765	1	1.31631	1.42109	1	1.05555	1.38463	1	0.945075	0.955284	1	1.58612	1.84485	0.00633255	0.000729654	0.0016316	0.0597052	0.0087743	0.00484429	0.0418827	0.000912112	0.0960546	0.00088196	0.154374
DIET 108	FDRT	1	0.753407	0.980439	1	1.40153	1.43048	1	1.0385	1.10458	1	0.957603	1.10995	1	1.07438	1.01924	1	1.54971	1.74957	1	0.770304	1.23628	1	0.836826	0.970971	1	0.970971	1.28967	1	0.866938	0.945075	1	0.837697	1.04391	0.00796008	0.000644737	0.00132297	0.065995	0.0190311	0.00515254	0.0537162	0.00127791	0.103845	0.000644961	0.196691
DIET 110	FDRT	1	1.15629	1.12194	1	1.45448	1.6144	1	1.37554	1.65462	1	0.881786	0.99585	1	0.938547	1.45852	1	1.93455	2.05196	1	1.457	1.67481	1	0.854113	1.19127	1	0.678537	1.03311	1	0.901562	0.962595	1	1.03133	0.95	0.00745023	0.000615267	0.000672583	0.0456418	0.00887831	0.00575887	0.0462149	0.0010301	0.0990294	0.000384561	0.227352
DIET 112	FDRT	1	0.960262	0.992061	1	1.06696	1.93187	1	1.16999	1.81819	1	0.977725	1.13131	1	0.945075	14.7128	1	1.73749	22.999	1	1.34304	11.6398	1	1.10842	2.30138	1	0.980439	1.06622	1	0.774588	1.15629	1	0.980778	2.04202	0.00684848	0.00066057	0.00059865	0.0350972	0.0105801	0.00510632	0.0363475	0.000894582	0.108856	0.000301302	0.179058
DIET 114	FDRT	1	0.582569	0.639936	1	0.984866	2.31097	1	0.743549	0.951318	1	0.92916	1.0479	1	0.565069	13.4917	1	0.679242	18.6681	1	0.449377	4.05724	1	0.859457	1.60603	1	0.838859	1.1	1	0.771373	1.09013	1	0.705637	1.73027	0.00628662	0.000877083	0.00178174	0.0559973	0.0132994	0.00662208	0.0372014	0.0010301	0.148548	0.000356948	0.147317
DIET 101	Non-FDRT	1		1.12039	1		0.9	1		1.3	1		1.5	1		1.4	1		2.5	1		2.6	1		1.12701	1		0.503478	1		0.881174	1		1.48195	0.00894936	0.000708473	0.000373915	0.0264425	0.0103015	0.0233166	0.131716	0.00255139	0.0882047	0.000298496	0.150621
DIET 104	Non-FDRT	1	0.711532	1.232	1	1.33376	1.15029	1	1.25963	1.15388	1	1.2367	1.10726	1	0.961927	5.16762	1	1.37984	4.08405	1	0.887919	2.02581	1	0.838858	0.878126	1	1.33191	1.32226	1	0.990343	0.961594	1	0.910985	1.3599	0.00763319	0.000465639	0.000844275	0.0498937	0.00676591	0.0122252	0.103342	0.00190367	0.0811368	0.000451809	0.149841
DIET 109	Non-FDRT	1	0.816769	1.37507	1	0.634416	0.912249	1	0.786218	1.31085	1	1.07066	1.1921	1	0.926909	0.858566	1	1.24229	1.28788	1	0.747425	1.63637	1	0.74976	0.878127	1	0.868441	0.886075	1	0.934328	0.993437	1	0.743292	0.797746	0.00894936	0.000708473	0.000373915	0.0264425	0.00554537	0.0233166	0.131716	0.00255139	0.0882047	0.000298496	0.150621
DIET 111	Non-FDRT	1	0.998268	1.01501	1	0.874785	1.2937	1	0.955613	1.18386	1	0.86814	0.835956	1	0.577142	4.7338	1	0.659296	4.59479	1	0.473521	3.30236	1	0.91955	1.07438	1	0.937896	0.940827	1	1.19541	1.16797	1	0.910355	1.58502	0.0131299	0.00246961	0.00287943	0.0986868	0.01356	0.00525898	0.0565629	0.00145073	0.0828991	0.00214174	0.235778
DIET 113	Non-FDRT	1	0.827023	0.984183	1	1.2008	0.956607	1	0.893166	0.812815	1	1.13249	1.25484	1	0.301139	0.406126	1	0.392564	0.349654	1	0.384618	0.712271	1	0.820742	1.18181	1	0.864238	0.991717	1	0.943112	0.986575	1	0.875089	1.08749	0.00971211	0.00233073	0.00256203	0.0725943	0.0142194	0.00589211	0.0479442	0.000991568	0.0778316	0.00245851	0.183138
DIET 115	Non-FDRT	1	0.892237	1.14512	1	0.991717	1.57462	1	0.789767	1.05995	1	1.16312	1.24315	1	1.3463	7.91177	1	1.3991	5.88891	1	0.955945	3.84904	1	0.969962	1.3904	1	0.913198	0.934327	1	0.967946	1.02847	1	1.13839	1.70941	0.0106132	0.00167747	0.00200664	0.062327	0.00796285	0.00709	0.0565629	0.00231063	0.0919186	0.0014588	0.169752
DIET 116	Non-FDRT	1	0.975355	1.06696	1	1.10458	1.29999	1	0.959929	1.14751	1	1.29101	1.16312	1	0.200337	2.45888	1	0.2414	3.00008	1	0.630252	2.04769	1	1.07923	1.4707	1	1.08448	1.03491	1	0.79996	0.998961	1	1.04102	1.1595	0.011618	0.0030701	0.00272694	0.0527385	0.0106205	0.00598887	0.0513853	0.00290852	0.119535	0.00194502	0.181558
DIET 117	Non-FDRT	1	1.23413	1.28254	1	1.11188	1.18222	1	1.11574	1.28654	1	1.06548	1.33007	1	0.0673817	1.01045	1	0.322082	1.29774	1	0.63244	1.70704	1	0.668268	0.89131	1	1.01924	1.05336	1	0.873269	0.908148	1	0.816486	1.2033	0.0102694	0.0044146	0.00285855	0.0602665	0.00746573	0.00623023	0.0592106	0.00242382	0.108405	0.00275353	0.18093
DIET 118	Non-FDRT	1	1.31631	1.76541	1	1.337	1.07661	1	1.30089	1.42949	1	2.00278	2.20228	1	0.0905276	0.0512786	1	0.184284	0.128916	1	0.190254	0.338447	1	1.20372	1.19872	1	0.887304	0.809442	1	0.655878	0.711038	1	0.843524	0.810004	0.00686274	0.00578487	0.00528639	0.0344943	0.00518838	0.00598887	0.0430901	0.00290852	0.119535	0.00501338	0.123322
Myotube genes
ID	Group	IL1β_0 nM-0 min_FCHG	IL1β_100 nM-10 min_FCHG	IL1β_100 nM-30 min_FCHG	IL1β_1000 nM-10 min_FCHG	IL1β_1000 nM-30 min_FCHG	TNFα_0-0_FCHG	TNFα_100-10_FCHG	TNFα_100-30_FCHG	TNFα_1000-10_FCHG	TNFα_1000-30_FCHG	TLR4_0-0_FCHG	TLR4_100-10_FCHG	TLR4_100-30_FCHG	TLR4_1000-10_FCHG	TLR4_1000-30_FCHG	TGFβ_0-0_FCHG	TGFβ_100-10_FCHG	TGFβ_100-30_FCHG	TGFβ_1000-10_FCHG	TGFβ_1000-30_FCHG	IL6_0-0_FCHG	IL6_100-10_FCHG	IL6_100-30_FCHG	IL6_1000-10_FCHG	IL6_1000-30_FCHG	IL10_0-0_FCHG	IL10_100-10_FCHG	IL10_100-30_FCHG	IL10_1000-10_FCHG	IL10_1000-30_FCHG	MCP1_0-0_FCHG	MCP1_100-10_FCHG	MCP1_100-30_FCHG	MCP1_1000-10_FCHG	MCP1_1000-30_FCHG	IL-1β_0 nM_0 min_GEXP	IL-6_0_0_GEXP	TGFβ_0_0_GEXP	IL-10_0_0_GEXP	MCP-1_0_0_GEXP	TNFα_0_0_GEXP	TLR4_0_0_GEXP
NIG CSA 048	FDRT	1	1.36944	1.49164	1.23891	1.14838	1	1.74832	1.66128	2.03728	2.00374	1	0.863175	1.07321	1.06002	1.057	1	1.27205	1.22605	1.3221	1.29607	1	1.04207	1.29332	1.26144	1.31716	1	1.88899	1.61944	2.27216	2.03877	1	1.44416	1.60082	1.05108	1.07247	0.000133929	0.00221933	0.029861	0.000183888	0.0186209	0.000148866	0.00573221
NIG CSA 064	FDRT	1	0.947114	1.3833	0.798718	0.946407	1	3.25793	1.69886	1.89941	3.36758	1	1.22188	0.940207	1.2886	1.06321	1	1.07676	1.00733	0.932775	1.04588	1	1.14056	1.35496	0.897196	1.57382	1	2.42327	1.66106	1.57784	3.01889	1	1.28248	1.24841	0.852591	0.990354	0.00271007	0.00361885	0.0393435	0.000154512	0.0665293	8.50403e-05	0.00477539
NIG CSA 135	FDRT	1	0.941471	0.965131	1.16734	1.04638	1	2.12566	1.36712	2.01114	1.79027	1	1.45039	1.08274	1.30888	1.40358	1	1.29499	1.17594	1.20586	1.43987	1	1.15264	1.36455	1.4409	1.64874	1	1.56705	1.24184	1.83531	1.7819	1	0.85791	0.919887	1.12332	1.09531	0.000801339	0.001735	0.0237309	0.000196577	0.0154618	0.000149578	0.00260689
NIG CSA 081	FDRT	1	1.24459	1.71339	1.5906	2.52975	1	1.71677	1.86364	2.15842	2.16389	1	1.37334	1.47747	1.46805	1.52038	1	1.01261	0.984454	1.03435	1.06029	1	1.12014	1.33982	1.41316	1.44451	1	1.56377	1.6895	1.74722	2.07441	1	1.0585	1.14138	1.20352	1.32621	0.000130862	0.00235557	0.0302985	0.000290085	0.0339669	0.000163241	0.00323508
NIG CSA 083	FDRT	1	0.797379	0.927341	0.98627	1.32713	1	1.28818	1.39657	1.21241	0.925374	1	0.977328	1.1454	1.03564	1.12328	1	0.88576	1.0355	0.846065	1.01773	1	0.955491	0.973154	1.06757	1.12463	1	1.08002	1.47869	1.22408	1.15697	1	1.10377	0.563631	1.71426	0.72142	0.00167784	0.00339055	0.0351612	0.000178046	0.136957	0.000144313	0.00740643
NIG CSA 014	Non-FDRT	1	1.1691	1.12891	1.88903	0.879214	1	1.33051	1.40124	1.96261	1.73602	1	1.11271	1.19445	1.67755	0.957102	1	0.719884	0.953775	1.37728	0.859562	1	0.889959	0.913603	1.08979	1.05028	1	1.44323	1.24303	1.98824	1.43118	1	0.753512	0.94519	0.946032	0.698503	0.000521936	0.000952168	0.0238001	0.000152504	0.0264079	0.000110509	0.00190631
NIG CSA 069	Non-FDRT	1	1.88839	1.6455	1.95672	1.82343	1	2.36908	3.31457	2.01216	4.99879	1	1.05021	1.15564	0.827765	1.35787	1	0.979055	1.04184	0.828427	1.05962	1	2.89671	3.53362	2.79804	4.26088	1	1.21972	2.51248	1.76736	3.87401	1	1.50625	1.3087	1.32664	1.13727	0.00207726	0.00124971	0.0432158	0.000557885	0.0367292	0.000294804	0.00723424
NIG CSA 077	Non-FDRT	1	1.08314	1.01152	1.06842	0.720031	1	0.980714	0.728822	1.14185	0.820708	1	0.838008	0.984213	0.730703	0.787858	1	1.04885	1.03153	1.1983	1.00535	1	1.1916	1.18397	1.41179	1.0539	1	0.999997	0.876403	1.22327	0.76606	1	0.924244	1.09013	1.11092	0.838877	0.00013942	0.00146879	0.0328454	0.000331329	0.0219186	0.000171964	0.0043521
NIG CSA 053	Non-FDRT	1	1.43	1.44615	1.06265	1.27675	1	1.48232	2.50844	1.59585	2.14005	1	1.0662	1.25489	1.0742	0.962286	1	1.12235	1.32054	1.14992	1.03733	1	0.726822	1.03819	0.895518	0.785158	1	1.35154	2.1224	1.20619	1.4606	1	0.485815	0.540874	0.604699	0.498481	0.000301075	0.0100881	0.0467036	0.00020604	0.0556244	0.000108272	0.00569889
NIG CSA 038	Non-FDRT	1	2.03839	3.19285	1.32997	1.30862	1	1.24138	1.04042	1.10033	0.639717	1	1.17943	1.11659	1.23586	1.12027	1	1.22284	1.32339	1.43325	1.34874	1	1.005	1.00058	1.12383	0.88089	1	0.960338	0.951249	0.891451	0.362702	1	0.758247	0.924467	1.46387	1.00933	6.45447e-05	0.00293403	0.0190984	0.000852501	0.0217431	0.000544963	0.003338
Adipocyte genes
ID	Group	IL1β_0 nM-0 min_FCHG	IL1β_100 nM-10 min_FCHG	IL1β_100 nM-30 min_FCHG	IL1β_1000 nM-10 min_FCHG	IL1β_1000 nM-30 min_FCHG	TNFα_0-0_FCHG	TNFα_100-10_FCHG	TNFα_100-30_FCHG	TNFα_1000-10_FCHG	TNFα_1000-30_FCHG	TLR4_0-0_FCHG	TLR4_100-10_FCHG	TLR4_100-30_FCHG	TLR4_1000-10_FCHG	TLR4_1000-30_FCHG	TGFβ_0-0_FCHG	TGFβ_100-10_FCHG	TGFβ_100-30_FCHG	TGFβ_1000-10_FCHG	TGFβ_1000-30_FCHG	IL6_0-0_FCHG	IL6_100-10_FCHG	IL6_100-30_FCHG	IL6_1000-10_FCHG	IL6_1000-30_FCHG	IL10_0-0_FCHG	IL10_100-10_FCHG	IL10_100-30_FCHG	IL10_1000-10_FCHG	IL10_1000-30_FCHG	MCP1_0-0_FCHG	MCP1_100-10_FCHG	MCP1_100-30_FCHG	MCP1_1000-10_FCHG	MCP1_1000-30_FCHG	IL-1β_0 nM_0 min_GEXP	IL-6_0_0_GEXP	TGFβ_0_0_GEXP	IL-10_0_0_GEXP	MCP-1_0_0_GEXP	TNFα_0_0_GEXP	TLR4_0_0_GEXP
NIG CSA 048	FDRT	1	0.738425	0.908135	0.61851	0.843772	1	1.9572	2.08227	2.36627	2.36002	1	0.960746	1.05283	1.26484	1.45411	1	0.97204	1.16812	0.814096	1.49769	1	1.3118	1.21066	1.00017	1.02125	1	1.20556	1.58658	1.17889	2.15971	1	1.01702	1.07436	0.919273	1.55425	0.000503487	0.000460792	0.0155312	6.31932e-05	0.0876593	5.092e-05	0.0279746
NIG CSA 064	FDRT	1	0.721186	0.61057	0.796232	0.806118	1	1.83791	1.85298	2.65299	1.87579	1	0.599318	0.742225	0.707334	0.779178	1	0.607792	0.730527	0.695116	0.838598	1	0.842156	1.03095	1.14648	1.18362	1	2.2397	2.46317	4.02148	5.02042	1	0.18888	0.242255	0.286445	0.49433	0.00464999	0.000694323	0.0139887	5.27412e-05	0.0262176	7.60634e-05	0.00612768
NIG CSA 135	FDRT	1	0.54846	0.626928	0.76825	0.593032	1	0.656489	1.00785	1.10596	1.49882	1	0.623317	0.791845	0.803246	0.952489	1	0.805132	0.840176	0.698255	0.81618	1	0.241706	0.357123	0.293565	0.643957	1	0.647053	0.641135	1.03142	1.19757	1	0.131892	0.0635483	0.226271	0.206148	0.00309364	0.0069289	0.0189457	0.000235865	0.116012	0.000172	0.00355168
NIG CSA 081	FDRT	1	0.910872	0.953853	1.36925	1.45935	1	1.56302	2.016	2.45362	4.08018	1	1.12421	1.13834	1.20261	1.29903	1	0.976417	0.974423	1.07067	1.0886	1	1.01477	1.3203	1.38762	1.62139	1	2.52782	2.85027	4.04447	6.71074	1	0.990057	1.03318	1.10354	1.27755	0.00077915	0.00232622	0.0182397	0.000110759	0.0675552	0.000141727	0.0154467
NIG CSA 083	FDRT	1	0.993581	0.825033	1.48424	1.5968	1	2.99003	3.13154	2.54383	4.95357	1	1.02179	1.29406	1.09418	1.14325	1	0.784672	1.03171	1.1308	1.10181	1	1.60437	1.28999	2.37992	2.63792	1	3.91398	3.13205	2.35207	4.06657	1	0.787595	0.594985	2.2909	2.06382	0.00110348	0.00354137	0.0185572	0.000233529	0.0866356	0.000221658	0.000221658
NIG CSA 014	Non-FDRT	1	0.886195	0.657426	0.97864	0.820574	1	2.38068	1.5964	2.95224	2.9252	1	1.2781	0.935828	1.14119	1.06151	1	1.10867	0.936038	0.971077	1.10966	1	0.924256	0.885416	1.07435	1.52349	1	3.32688	2.47366	3.36301	6.11677	1	1.10409	1.09103	1.20945	1.23255	0.00269898	0.000776155	0.0110983	2.83714e-05	0.0192907	4.87832e-05	0.0020544
NIG CSA 069	Non-FDRT	1	0.940465	0.72087	0.834361	0.793246	1	1.88254	1.4609	2.45342	1.52707	1	0.997421	1.28364	0.986005	0.979409	1	0.740928	1.76879	1.22215	1.02843	1	1.58129	1.82815	1.19953	1.80263	1	1.84288	1.45702	1.28061	1.82323	1	1.0318	0.928687	0.861774	0.753781	0.0027592	0.000936581	0.00984732	0.000103361	0.0390906	0.000103952	0.00720179
NIG CSA 077	Non-FDRT	1	0.751304	0.824305	1.40281	1.11884	1	1.05444	1.14433	1.55168	1.97727	1	0.635704	0.780443	0.578881	0.73015	1	1.01967	0.94572	0.991862	1.01209	1	1.24843	1.1215	1.44586	1.78855	1	4.25563	5.47183	4.28101	9.54727	1	0.780671	0.811475	1.73176	1.65655	0.000838724	0.00109854	0.0227783	5.95406e-05	0.0119228	0.000203242	0.0132685
NIG CSA 053	Non-FDRT	1	0.9859	1.03423	1.06864	1.12602	1	1.74723	0.72948	1.35058	1.32341	1	1.16523	0.851035	0.986735	1.00525	1	0.60956	0.915817	1.02472	1.0161	1	1.38183	0.933931	1.61566	1.30602	1	1.55706	1.65424	1.40619	1.61662	1	1.02941	0.938191	1.13916	1.10804	0.00200168	0.000179682	0.00657901	1.03748e-05	0.0067212	1.11776e-05	0.0015866
NIG CSA 038	Non-FDRT	1	1.95861	0.997428	2.21828	1.46989	1	0.838482	0.831651	0.91279	0.806086	1	0.943679	0.858753	1.07188	0.884952	1	0.985848	1.06488	1.06683	0.917321	1	1.48994	1.29441	1.64906	1.49242	1	1.01211	0.982519	1.16834	1.21868	1	1.69172	1.02709	1.82059	1.1511	0.0027244	0.00176668	0.0161767	0.00038156	0.01568	0.000506437	0.000506437
FCHG- Fold changes
GEXP- Gene expression

## Sheet: Cytokine
Plasma cytokine ELISA data
ID	Group	IL6_0 min_ELISA	IL6_120 min_ELISA	IL6_360 min_ELISA
DIET 102	FDRT	0.357268	0.412669	1.25995
DIET 103	FDRT	9.71635	8.72541	7.73409
DIET 105	FDRT	0.286879	0.284384	0.626756
DIET 106	FDRT	0.538642	1.18194	1.76418
DIET 107	FDRT	0.599035	0.511004	1.10285
DIET 108	FDRT	0.47662	0.289374	0.688896
DIET 110	FDRT	0.4544	0.505266	1.10912
DIET 112	FDRT	2.36761	1.5308	0.923543
DIET 114	FDRT	0.398395	0.432306	0.674929
DIET 101	Non-FDRT	0.502076	0.486061	0.707901
DIET 104	Non-FDRT	0.370937	0.407634	0.798776
DIET 109	Non-FDRT	0.33437	0.339255	1.11229
DIET 111	Non-FDRT	0.689358	1.06091	2.06808
DIET 113	Non-FDRT	0.237819	0.179148	0.425988
DIET 115	Non-FDRT	0.401928	0.2721	0.820083
DIET 116	Non-FDRT	0.559613	0.534057	1.55728
DIET 117	Non-FDRT	0.517303	0.414182	0.814992
DIET 118	Non-FDRT	0.29194	0.247904	0.488104

## Sheet: Protein
Western blot data
Adipocytes
	Lanes	NF-kB Density	Relative NF-kB Density (to Control)	H3 Histone (Loading Control) Density	Relative H3 Density (to Control)	Adjusted Density (to Loading Cntrl)
1st Set	1	7301.43	1	6063.41	1	1
	3	6798.72	0.931149	8698.11	1.43453	0.649099
	2	10694.7	1	11847.5	1	1
	4	10837.4	1.01334	10976.7	0.926504	1.09372
2nd Set	1	12554.5	1	8093.97	1	1
	3	16748.4	1.33405	38075.9	4.70423	0.283586
	2	13260.9	1	28973.4	1	1
	4	9973.05	0.752064	43815.8	1.51228	0.497306
3rd Set	1	14468.4	1	31511.6	1	1
	3	15960.3	1.10311	42711	1.35541	0.813862
	2	12540.2	1	23534.8	1	1
	4	13231.1	1.05509	24424.5	1.0378	1.01666
4th Set	1	9752.55	1	22212.6	1	1
	3	14868.3	1.52456	21677.5	0.975912	1.56219
	2	15279.4	1	17508.5	1	1
	4	19659.4	1.28666	15346.7	0.876528	1.4679
5th Set	1	30020.3	1	28560.5	1	1
	3	28493.3	0.949134	45648.4	1.59831	0.593838
	2	11690	1	35186.1	1	1
	4	11306.3	0.967175	32754.8	0.930901	1.03897
Myotubes
	Lanes	NF-kB Density	Relative NF-kB Density (to Control)	H3 Histone (Loading Control) Density	Relative H3 Density (to Control)	Adjusted Density (to Loading Cntrl)
1st Set	1	6890.38	1	14297.4	1	1
	3	9767.86	1.41761	11646.3	0.814573	1.74031
	2	10308.6	1	11531.4	1	1
	4	9103.28	0.883072	9493.69	0.823287	1.07262
2nd Set	1	5457.2	1	12720.8	1	1
	3	9708.23	1.77897	10252.8	0.80599	2.20719
	2	10635.3	1	10852.2	1	1
	4	10365.6	0.97464	8299.81	0.764803	1.27437
3rd Set	1	8405.45	1	11365.5	1	1
	3	8811.45	1.0483	9891.23	0.870284	1.20455
	2	8907.28	1	8135.91	1	1
	4	7216.79	0.810213	8723.05	1.07217	0.755678
4th Set	1	4235.26	1	9570.98	1	1
	3	9539.5	2.2524	8884.62	0.928287	2.42641
	2	9574.86	1	6534.38	1	1
	4	7799.55	0.814586	4630.31	0.708607	1.14956
5th Set	1	10717.9	1	4470.43	1	1
	3	13457.9	1.25565	4602.43	1.02953	1.21964
	2	10772.4	1	4763.89	1	1
	4	9192.62	0.853345	3202.89	0.672327	1.26924
