# Supplementary material
Source: HighWire-hosted journal article supplement (https://drc.bmj.com/content/8/1/e000945)
Supplement: inline-supplementary-material-13 [file inline-supplementary-material-13.xls]

## Sheet: List of genes
Gene name	Gene symbol	Gene ID	Chromosome
Cytochrome b-245 alpha chain	CYBA	ENSG00000051523	16
Cytochrome b-245 beta chain	CYBB	ENSG00000165168	X
Glutathione peroxidase 3	GPX3	ENSG00000211445	5
Interleukin 6	IL-6	ENSG00000136244	7
Interleukin 10	IL-10	ENSG00000136634	1
Neutrophil cytosolic factor 1	NCF-1	ENSG00000158517	7
Neutrophil cytosolic factor 2	NCF-2	ENSG00000116701	1
Neutrophil cytosolic factor 4	NCF-4	ENSG00000100365	22
Nuclear factor, erythroid 2 like 2	NRF2	ENSG00000116044	2
Superoxide dismutase 1	SOD-1	ENSG00000142168	21
Tumor necrosis factor-alpha	TNF-a	ENSG00000232810	6
Thioredoxin	TXN	ENSG00000136810	9
Thioredoxin reductase 1	TXNRD1	ENSG00000198431	12

## Sheet: T2D susceptibility genetic loci
Lead variants associated with type 2 diabetes in East Asian sex-combined BMI-unadjusted and BMI-adjusted meta-analyses (https://www.biorxiv.org/content/10.1101/685172v1)
Nearest gene	Variant	Chr	Pos	Risk allele	Nonrisk allele
178 loci significant BMI-unadjusted meta-analysis
VWA5B1	rs60573766	1	20688352	C	T
MACF1	rs371894931	1	39942242	CA	C
MAST2	rs562138031	1	46244900	C	CT
FAF1	rs3789587	1	51266474	C	T
PGM1	rs2269239	1	64109359	C	G
SEC16B	rs693232	1	177881651	G	C
TSEN15	rs1327123	1	184014593	C	G
MDM4	rs201297151	1	204474581	CAAAAAAAA	C
PROX1	rs12403994	1	214155398	C	A
NUP133	rs238763	1	229642499	T	A
TMEM18	rs5017300	2	631099	G	C
GCKR	rs1260326	2	27730940	C	T
SIX3	rs12712928	2	45192080	C	G
BCL11A	rs243018	2	60586707	G	C
SCTR	rs3731600	2	120231070	C	G
EPC2	rs200576292	2	149568261	CT	C
GRB14	rs75536691	2	165381518	A	G
IKZF2	rs75179644	2	213687103	T	C
DGKD	rs117809958	2	234191103	A	T
PPARG	rs3963364	3	12385357	C	A
UBE2E2	rs11926494	3	23258614	G	A
PSMD6	rs10576211	3	63891072	AGAC	A
ZBTB20	rs6768463	3	114964264	T	A
CASR	rs9859381	3	121965199	G	T
ADCY5	rs2332541	3	123158158	T	C
SLC12A8	rs9873519	3	124921457	T	C
MBNL1	rs1850421	3	152382352	A	C
EIF5A2	rs201018682	3	170643788	T	C
IGF2BP2	rs4389513	3	185506857	G	T
ST6GAL1	rs11332772	3	186649931	C	CG
BCL6-LPP	rs13086331	3	187698333	T	C
TFRC	rs9866168	3	195830310	T	A
CTBP1/AS1	rs7656416	4	1254535	C	T
MAEA/PCGF3	rs6831006	4	1784605	G	C
WFS1	rs147834269	4	6303731	G	A
GNPDA2	rs10938398	4	45186139	A	G
MOB1B	rs7674402	4	71835822	A	G
NKX6-1	rs117624659	4	85339618	T	C
TMEM154	rs10011838	4	153520279	G	A
ANKH	rs6885132	5	14768092	C	G
RANBP3L	rs16902871	5	36257018	G	A
ITGA1	rs12109081	5	51751574	T	A
ANKRD55	rs256903	5	55809138	A	C
HMGCR	rs2126736	5	74574984	A	G
PCSK1	rs11960326	5	95850807	C	T
PHF15	rs329122	5	133864599	A	G
FGFR4	rs3135911	5	176513896	A	C
SSR1/RREB1	rs9379084	6	7231843	G	A
CDKAL1	rs9350271	6	20683164	A	G
MHC-region	rs76541615	6	31026236	T	G
HMGA1	rs4711389	6	34214670	A	G
GLP1R	rs742762	6	39046644	A	C
TFAP2B	rs2206271	6	50786008	A	T
NUS1	rs80196932	6	117996631	T	C
CENPW	rs4273712	6	126964510	G	A
ENPP3	rs7739842	6	131954797	G	T
SLC35D3	rs2327777	6	137293227	T	C
REPS1	rs556058292	6	139259142	C	CT
HIVEP2	rs9390022	6	143056556	T	C
ETV1	rs7787720	7	13886654	T	C
DGKB	rs17168486	7	14898282	T	C
JAZF1	rs3735567	7	28219310	G	A
MYL7 (GCK)	rs2908279	7	44174857	G	T
ZNF713	rs565050730	7	55984953	GA	G
AUTS2	rs610930	7	69189726	A	G
AUTS2	rs12698877	7	69696905	G	A
STEAP1	rs62469016	7	89752238	C	G
CALCR	rs2074120	7	93107093	A	C
RASA4	rs75990271	7	102336979	T	C
GRM8/PAX4	rs117737118	7	126526991	G	A
PAX4	rs2233580	7	127253550	T	C
PAX4/SND1/LEP	rs61342118	7	127761917	A	C
BRAF	rs71170768	7	140579350	TA	T
MNX1	rs7778193	7	156980087	C	T
ASAH1	rs34642578	8	17927609	T	C
KCNU1/ZNF703	rs56687477	8	36832310	A	G
ZNF703	rs12680217	8	37397803	T	C
ANK1	rs33981001	8	41512648	GGT	G
GDAP1	rs149265787	8	75214398	G	A
TP53INP1	rs10706167	8	95891854	CT	C
SLC30A8	rs13266634	8	118184783	C	T
TRIB1	rs10103720	8	126471770	C	T
EFR3A	rs73708055	8	132879882	G	A
DMRT2	rs1016565	9	1032567	A	G
GLIS3	rs4237150	9	4290085	C	G
CDKN2A/B	rs10965248	9	22132878	T	C
TLE4	rs34532817	9	81914318	C	T
TLE1	rs2796441	9	84308948	G	A
PTCH1	rs113154802	9	98278413	C	T
ABCA1	rs201375651	9	107597527	CA	C
ABO	rs529565	9	136149500	C	T
GPSM1	rs58420526	9	139246736	A	G
CDC123/CAMK1D	rs11257657	10	12309139	G	C
PTF1A	rs77065181	10	23487778	A	G
ARID5B	rs141583966	10	63712602	G	GGTGT
JMJD1C	rs148928116	10	64976133	T	TA
TSPAN15/NEUROG3	rs1955163	10	71273357	G	A
LRMDA	rs7900112	10	77314617	T	A
ZMIZ1	rs34204798	10	80951130	C	CG
PTEN	rs1234213	10	89689321	A	G
BTAF1	rs150474047	10	93687696	T	G
HHEX/IDE	rs35906730	10	94435673	G	A
MYOF	rs565236700	10	95009180	C	T
ARHGAP19	rs10736116	10	99056921	C	G
BBIP1	rs7895872	10	112678657	T	G
TCF7L2	rs4506565	10	114756041	T	A
WDR11/FGFR2	rs10886863	10	122929493	C	T
PLEKHA1	rs112820281	10	124150342	C	CTGGA
INS/IGF2	rs11043003	11	2203154	C	T
KCNQ1	rs2237897	11	2858546	C	T
KCNJ11/ABCC8	rs4148646	11	17415190	C	G
BDNF	rs988748	11	27724745	G	C
CCND1	rs602652	11	69462642	A	G
CENTD2/ARAP1	rs7109575	11	72463435	G	A
CCND2	rs7304270	12	4381981	C	T
KLHDC5	rs3751239	12	27963676	C	G
SINHCAF/DENND5B	rs80234489	12	31441179	C	A
FAIM2	rs77978149	12	50269863	T	C
HMGA2	rs2612059	12	66239111	C	A
TSPAN8/LGR5	rs7313668	12	71449521	T	G
RMST	rs7972074	12	97851611	C	T
WSCD2	rs1426371	12	108629780	G	A
SH2B3	rs149212747	12	111836771	A	AC
HECTD4 (ALDH2)	rs77768175	12	112736118	A	G
RBM19	rs7307263	12	114123722	G	C
KSR2	rs7132351	12	118414926	A	G
HNF1A	rs187150787	12	121327809	A	G
FGF9	rs9316706	13	22589883	A	G
RNF6	rs568052023	13	26781367	C	CA
KL	rs8002606	13	33554773	G	C
DLEU1	rs123378	13	51088809	G	A
SPRY2	rs1215468	13	80707429	A	G
MIR17HG	rs9523295	13	91948047	G	A
NYNRIN	rs12437434	14	24878370	C	T
CLEC14A	rs7147483	14	38804675	T	C
LRRC74A	rs140431144	14	77382093	TA	T
DLK1/MEG3/miRNA cluster	rs73347525	14	101255172	A	G
TRAF3	rs55700915	14	103237952	A	G
HERC2	rs76704029	15	28546173	T	C
RASGRP1	rs8043085	15	38828140	T	G
INAFM2	rs12907887	15	40615872	C	G
MYO5C	rs149336329	15	52587740	G	T
C2CD4A/B	rs8037894	15	62394264	G	C
MAP2K5	rs4776970	15	68080886	A	T
SIN3A	rs8038760	15	75742095	A	C
HMG20A	rs6495240	15	77766556	C	T
AP3S2	rs10852123	15	90428894	A	C
PRC1	rs8026714	15	91522253	A	G
RGMA	rs61021634	15	93825384	A	G
IGF1R	rs79826452	15	99366409	A	G
SLX4	rs2240885	16	3647098	A	G
GP2	rs117267808	16	20323168	A	G
FTO	rs55872725	16	53809123	T	C
PKD1L3	rs12600132	16	72022534	T	C
ZFHX3	rs6416749	16	73100308	C	T
CMIP	rs2925979	16	81534790	T	C
SLC16A11	rs186568031	17	6953781	T	C
NF1	rs7502556	17	29642430	T	C
HNF1B/TCF2	rs8064454	17	36101586	A	C
PITPNC1	rs2706710	17	65641651	T	C
SUMO2	rs35559984	17	73187031	CA	C
LAMA1	rs9948462	18	7076836	T	C
MC4R	rs476828	18	57852587	C	T
BCL2A	rs12454712	18	60845884	T	C
INSR	rs8101064	19	7293119	T	C
MAP2K7	rs2115107	19	7968168	A	G
ZNF799	rs4804181	19	12509536	A	C
ZNF738	rs145389767	19	21529576	G	A
ZNF257	rs142395395	19	22100706	A	G
PEPD	rs7250869	19	33887405	T	C
EML2/GIPR	rs113036890	19	46157928	CAAAAAAAA	C
FOXA2	rs73085586	20	22430241	G	A
HNF4A	rs12625671	20	42994812	C	T
CEBPB	rs13040225	20	48830772	A	T
NFATC2	rs6021276	20	50155386	T	C
ZNRF3	rs147413364	22	29380119	T	TA
WNT7B	rs28637892	22	46313618	T	G
PIM3	rs28691713	22	50356302	C	T
10 additional loci significant in BMI-adjusted meta-analysis (https://www.biorxiv.org/content/10.1101/685172v)
MYOM3	rs35880795	1	24371803	A	AT
TSN	rs59820396	2	123307877	A	ATT
PIK3R1	rs7719763	5	67681425	A	G
EBF1	rs748510	5	158025983	C	T
GRB10	rs77371031	7	50802203	C	T
BOP1/ZNF34	rs2727245	8	145945574	A	T
CELF1	rs7103648	11	47461783	G	A
MTNR1B	rs10830963	11	92708710	G	C
NID2	rs79823890	14	52511969	G	T
BCAR1	rs8051363	16	75255217	G	A

## Sheet: GTEx_CYBA
Gencode Id	Gene Symbol	Variant Id	SNP Id	P-Value	NES	Tissue
ENSG00000051523.6	CYBA	16_88698763_G_A_b37	rs11076687	3.1e-24	0.8	Pancreas
ENSG00000051523.6	CYBA	16_88703223_G_A_b37	rs9937257	2.2e-23	0.77	Pancreas
ENSG00000051523.6	CYBA	16_88682590_C_T_b37	rs4782386	2.6e-23	0.77	Pancreas
ENSG00000051523.6	CYBA	16_88677118_C_T_b37	rs11646212	2.7e-23	0.77	Pancreas
ENSG00000051523.6	CYBA	16_88679632_A_G_b37	rs11861123	2.8e-23	0.77	Pancreas
ENSG00000051523.6	CYBA	16_88694865_C_G_b37	rs2279259	9.7e-23	0.77	Pancreas
ENSG00000051523.6	CYBA	16_88695484_C_T_b37	rs58553631	9.7e-23	0.77	Pancreas
ENSG00000051523.6	CYBA	16_88695745_G_T_b37	rs62047997	1.7e-22	0.77	Pancreas
ENSG00000051523.6	CYBA	16_88685025_C_A_b37	rs4782305	1.9e-22	0.79	Pancreas
ENSG00000051523.6	CYBA	16_88687806_A_G_b37	rs55775803	3.6e-22	0.8	Pancreas
ENSG00000051523.6	CYBA	16_88693051_G_A_b37	rs62047995	7.5e-22	0.78	Pancreas
ENSG00000051523.6	CYBA	16_88691401_G_A_b37	rs2291159	8.7e-22	0.79	Pancreas
ENSG00000051523.6	CYBA	16_88690882_G_GAGC_b37	rs397722499	9.1e-22	0.77	Pancreas
ENSG00000051523.6	CYBA	16_88699543_T_G_b37	rs9935450	1.4e-21	0.75	Pancreas
ENSG00000051523.6	CYBA	16_88699450_G_C_b37	rs62047999	3.7e-21	0.74	Pancreas
ENSG00000051523.6	CYBA	16_88674509_G_T_b37	rs62050306	4.6e-21	0.82	Pancreas
ENSG00000051523.6	CYBA	16_88670950_C_T_b37	rs79688656	2.2e-20	0.78	Pancreas
ENSG00000051523.6	CYBA	16_88666553_C_G_b37	rs3751678	2.8e-20	0.78	Pancreas
ENSG00000051523.6	CYBA	16_88666048_G_A_b37	rs62050304	7.3e-20	0.79	Pancreas
ENSG00000051523.6	CYBA	16_88676199_G_GTTTTT_b37	rs78747058	3.2e-19	0.7	Pancreas
ENSG00000051523.6	CYBA	16_88676200_G_A_b37	rs62050307	3.2e-19	0.7	Pancreas
ENSG00000051523.6	CYBA	16_88676384_T_A_b37	rs62050308	1.5e-18	0.68	Pancreas
ENSG00000051523.6	CYBA	16_88676570_A_G_b37	rs62050309	1.5e-18	0.68	Pancreas
ENSG00000051523.6	CYBA	16_88717074_G_A_b37	rs3794624	2.3e-18	-0.23	Nerve - Tibial
ENSG00000051523.6	CYBA	16_88717957_G_A_b37	rs13306296	7.2e-18	-0.23	Nerve - Tibial
ENSG00000051523.6	CYBA	16_88699838_T_TACGGCCAGGAGCGGACAGGTGAGCCCACCACAGCTCA_b37	rs796153547	1.4e-17	0.74	Pancreas
ENSG00000051523.6	CYBA	16_88683252_G_A_b37	rs59322069	4.8e-17	0.92	Pancreas
ENSG00000051523.6	CYBA	16_88663371_C_G_b37	rs11644924	1.7e-16	0.66	Pancreas
ENSG00000051523.6	CYBA	16_88662710_G_C_b37	rs62050303	2.7e-16	0.67	Pancreas
ENSG00000051523.6	CYBA	16_88658151_C_A_b37	rs62050302	4.2e-16	0.8	Pancreas
ENSG00000051523.6	CYBA	16_88716342_G_A_b37	rs35601559	3.2e-15	-0.23	Nerve - Tibial
ENSG00000051523.6	CYBA	16_88631611_T_G_b37	rs62050265	1.4e-14	0.59	Pancreas
ENSG00000051523.6	CYBA	16_88629599_T_C_b37	rs2334244	3.1e-14	0.74	Pancreas
ENSG00000051523.6	CYBA	16_88720611_G_A_b37	rs1017828	3.6e-13	-0.19	Nerve - Tibial
ENSG00000051523.6	CYBA	16_88720678_G_A_b37	rs1480333	9.5e-13	-0.18	Nerve - Tibial
ENSG00000051523.6	CYBA	16_88649586_T_C_b37	rs4782499	1.3e-12	0.69	Pancreas
ENSG00000051523.6	CYBA	16_88651489_A_G_b37	rs61360381	1.9e-12	0.68	Pancreas
ENSG00000051523.6	CYBA	16_88717957_G_A_b37	rs13306296	2.3e-12	-0.37	Brain - Caudate (basal ganglia)
ENSG00000051523.6	CYBA	16_88717074_G_A_b37	rs3794624	2.7e-12	-0.22	Artery - Aorta
ENSG00000051523.6	CYBA	16_88667093_C_T_b37	rs7206465	9.9e-12	0.54	Pancreas
ENSG00000051523.6	CYBA	16_88688435_G_T_b37	rs1111434	1.1e-11	0.48	Pancreas
ENSG00000051523.6	CYBA	16_88688547_T_C_b37	rs1111433	1.1e-11	0.49	Pancreas
ENSG00000051523.6	CYBA	16_88668908_T_C_b37	rs11076685	2.5e-11	0.5	Pancreas
ENSG00000051523.6	CYBA	16_88669216_T_C_b37	rs4782377	2.5e-11	0.5	Pancreas
ENSG00000051523.6	CYBA	16_88717957_G_A_b37	rs13306296	2.8e-11	-0.22	Artery - Aorta
ENSG00000051523.6	CYBA	16_88717074_G_A_b37	rs3794624	4.6e-11	-0.43	Brain - Nucleus accumbens (basal ganglia)
ENSG00000051523.6	CYBA	16_88716342_G_A_b37	rs35601559	1e-10	-0.22	Artery - Aorta
ENSG00000051523.6	CYBA	16_88634038_A_C_b37	rs4782452	1.3e-10	0.47	Pancreas
ENSG00000051523.6	CYBA	16_88729788_C_T_b37	rs3794628	1.5e-10	-0.18	Nerve - Tibial
ENSG00000051523.6	CYBA	16_88727733_C_T_b37	rs6500487	2.8e-10	0.16	Nerve - Tibial
ENSG00000051523.6	CYBA	16_88729573_C_T_b37	rs3794625	3e-10	-0.17	Nerve - Tibial
ENSG00000051523.6	CYBA	16_88716342_G_A_b37	rs35601559	3.7e-10	-0.22	Muscle - Skeletal
ENSG00000051523.6	CYBA	16_88716342_G_A_b37	rs35601559	4.5e-10	-0.13	Skin - Sun Exposed (Lower leg)
ENSG00000051523.6	CYBA	16_88717074_G_A_b37	rs3794624	5e-10	-0.12	Artery - Tibial
ENSG00000051523.6	CYBA	16_88717957_G_A_b37	rs13306296	5.2e-10	-0.45	Brain - Nucleus accumbens (basal ganglia)
ENSG00000051523.6	CYBA	16_88678038_C_G_b37	rs11647611	7.9e-10	-0.45	Pancreas
ENSG00000051523.6	CYBA	16_88717074_G_A_b37	rs3794624	8.3e-10	-0.24	Stomach
ENSG00000051523.6	CYBA	16_88729788_C_T_b37	rs3794628	1e-09	-0.21	Artery - Aorta
ENSG00000051523.6	CYBA	16_88675177_A_G_b37	rs9932685	1.1e-09	-0.46	Pancreas
ENSG00000051523.6	CYBA	16_88695604_C_T_b37	rs7198909	1.1e-09	-0.45	Pancreas
ENSG00000051523.6	CYBA	16_88701067_A_G_b37	rs7195384	1.3e-09	0.46	Pancreas
ENSG00000051523.6	CYBA	16_88680191_C_A_b37	rs13330572	1.3e-09	-0.44	Pancreas
ENSG00000051523.6	CYBA	16_88717074_G_A_b37	rs3794624	1.4e-09	-0.2	Heart - Left Ventricle
ENSG00000051523.6	CYBA	16_88717074_G_A_b37	rs3794624	1.4e-09	-0.3	Brain - Caudate (basal ganglia)
ENSG00000051523.6	CYBA	16_88717074_G_A_b37	rs3794624	1.5e-09	-0.2	Muscle - Skeletal
ENSG00000051523.6	CYBA	16_88696485_C_G_b37	rs8062710	1.7e-09	-0.45	Pancreas
ENSG00000051523.6	CYBA	16_88695300_C_T_b37	rs4782387	2.1e-09	-0.45	Pancreas
ENSG00000051523.6	CYBA	16_88721012_G_A_b37	rs12935454	3e-09	-0.16	Nerve - Tibial
ENSG00000051523.6	CYBA	16_88719877_C_G_b37	rs12926212	3e-09	-0.16	Nerve - Tibial
ENSG00000051523.6	CYBA	16_88680134_C_G_b37	rs11076686	3.2e-09	-0.44	Pancreas
ENSG00000051523.6	CYBA	16_88717957_G_A_b37	rs13306296	3.3e-09	-0.19	Heart - Left Ventricle
ENSG00000051523.6	CYBA	16_88717957_G_A_b37	rs13306296	3.9e-09	-0.12	Skin - Sun Exposed (Lower leg)
ENSG00000051523.6	CYBA	16_88766359_C_T_b37	rs11648894	4.3e-09	-0.21	Artery - Aorta
ENSG00000051523.6	CYBA	16_88633052_G_C_b37	rs56983565	4.5e-09	0.44	Pancreas
ENSG00000051523.6	CYBA	16_88716342_G_A_b37	rs35601559	5.4e-09	-0.39	Brain - Nucleus accumbens (basal ganglia)
ENSG00000051523.6	CYBA	16_88717957_G_A_b37	rs13306296	5.9e-09	-0.18	Esophagus - Muscularis
ENSG00000051523.6	CYBA	16_88717957_G_A_b37	rs13306296	7.8e-09	-0.23	Stomach
ENSG00000051523.6	CYBA	16_88717074_G_A_b37	rs3794624	8.6e-09	-0.18	Esophagus - Muscularis
ENSG00000051523.6	CYBA	16_88763151_G_A_b37	rs13556	8.9e-09	-0.2	Artery - Aorta
ENSG00000051523.6	CYBA	16_88717074_G_A_b37	rs3794624	9.6e-09	-0.11	Skin - Sun Exposed (Lower leg)
ENSG00000051523.6	CYBA	16_88717957_G_A_b37	rs13306296	9.6e-09	-0.42	Brain - Putamen (basal ganglia)
ENSG00000051523.6	CYBA	16_88717957_G_A_b37	rs13306296	1.1e-08	-0.11	Artery - Tibial
ENSG00000051523.6	CYBA	16_88717957_G_A_b37	rs13306296	1.1e-08	-0.12	Adipose - Subcutaneous
ENSG00000051523.6	CYBA	16_88729788_C_T_b37	rs3794628	1.5e-08	-0.11	Artery - Tibial
ENSG00000051523.6	CYBA	16_88729573_C_T_b37	rs3794625	1.6e-08	-0.19	Muscle - Skeletal
ENSG00000051523.6	CYBA	16_88729788_C_T_b37	rs3794628	1.9e-08	-0.19	Muscle - Skeletal
ENSG00000051523.6	CYBA	16_88729573_C_T_b37	rs3794625	1.9e-08	-0.39	Brain - Nucleus accumbens (basal ganglia)
ENSG00000051523.6	CYBA	16_88701230_G_C_b37	rs7196024	2.2e-08	-0.41	Pancreas
ENSG00000051523.6	CYBA	16_88729788_C_T_b37	rs3794628	2.4e-08	-0.12	Skin - Sun Exposed (Lower leg)
ENSG00000051523.6	CYBA	16_88743630_GT_G_b37		2.7e-08	-0.2	Artery - Aorta
ENSG00000051523.6	CYBA	16_88743632_GGA_G_b37		2.7e-08	-0.2	Artery - Aorta
ENSG00000051523.6	CYBA	16_88743636_AGAGGCCCAGAC_A_b37	rs752800349	2.7e-08	-0.2	Artery - Aorta
ENSG00000051523.6	CYBA	16_88743648_C_T_b37	rs141364557	2.7e-08	-0.2	Artery - Aorta
ENSG00000051523.6	CYBA	16_88729788_C_T_b37	rs3794628	3.3e-08	-0.39	Brain - Nucleus accumbens (basal ganglia)
ENSG00000051523.6	CYBA	16_88761503_C_A_b37	rs72811459	3.7e-08	-0.2	Artery - Aorta
ENSG00000051523.6	CYBA	16_88718275_C_G_b37	rs16966671	4.1e-08	0.16	Thyroid
ENSG00000051523.6	CYBA	16_88733605_T_G_b37	rs13334987	4.3e-08	-0.18	Muscle - Skeletal
ENSG00000051523.6	CYBA	16_88767468_C_T_b37	rs4782425	4.4e-08	-0.2	Artery - Aorta
ENSG00000051523.6	CYBA	16_88732862_T_G_b37	rs9929039	4.4e-08	-0.18	Muscle - Skeletal
ENSG00000051523.6	CYBA	16_88717957_G_A_b37	rs13306296	4.7e-08	-0.18	Muscle - Skeletal
ENSG00000051523.6	CYBA	16_88727733_C_T_b37	rs6500487	5.7e-08	0.1	Skin - Sun Exposed (Lower leg)
ENSG00000051523.6	CYBA	16_88633530_C_G_b37	rs8053733	5.9e-08	0.48	Pancreas
ENSG00000051523.6	CYBA	16_88729573_C_T_b37	rs3794625	6e-08	-0.1	Artery - Tibial
ENSG00000051523.6	CYBA	16_88763151_G_A_b37	rs13556	6.1e-08	-0.11	Artery - Tibial
ENSG00000051523.6	CYBA	16_88716342_G_A_b37	rs35601559	6.2e-08	-0.24	Stomach
ENSG00000051523.6	CYBA	16_88683946_A_G_b37	rs8047318	6.6e-08	-0.39	Pancreas
ENSG00000051523.6	CYBA	16_88689997_C_T_b37	rs2277903	6.7e-08	0.4	Pancreas
ENSG00000051523.6	CYBA	16_88702487_T_C_b37	rs8059449	6.8e-08	0.41	Pancreas
ENSG00000051523.6	CYBA	16_88634563_A_G_b37	rs72809412	6.8e-08	0.47	Pancreas
ENSG00000051523.6	CYBA	16_88717074_G_A_b37	rs3794624	7.3e-08	-0.15	Skin - Not Sun Exposed (Suprapubic)
ENSG00000051523.6	CYBA	16_88729573_C_T_b37	rs3794625	7.4e-08	-0.18	Artery - Aorta
ENSG00000051523.6	CYBA	16_88646189_G_A_b37	rs62050300	8.1e-08	0.48	Pancreas
ENSG00000051523.6	CYBA	16_88733605_T_G_b37	rs13334987	8.3e-08	-0.14	Nerve - Tibial
ENSG00000051523.6	CYBA	16_88680855_A_T_b37	rs4782380	8.7e-08	-0.4	Pancreas
ENSG00000051523.6	CYBA	16_88720678_G_A_b37	rs1480333	9.6e-08	-0.11	Skin - Sun Exposed (Lower leg)
ENSG00000051523.6	CYBA	16_88729788_C_T_b37	rs3794628	9.8e-08	-0.29	Brain - Caudate (basal ganglia)
ENSG00000051523.6	CYBA	16_88638854_T_G_b37	rs8055488	1e-07	0.44	Pancreas
ENSG00000051523.6	CYBA	16_88717957_G_A_b37	rs13306296	1e-07	-0.17	Cells - Transformed fibroblasts
ENSG00000051523.6	CYBA	16_88646780_A_G_b37	rs7199736	1.2e-07	0.41	Pancreas
ENSG00000051523.6	CYBA	16_88727733_C_T_b37	rs6500487	1.3e-07	0.17	Muscle - Skeletal
ENSG00000051523.6	CYBA	16_88717957_G_A_b37	rs13306296	1.3e-07	-0.15	Skin - Not Sun Exposed (Suprapubic)
ENSG00000051523.6	CYBA	16_88727733_C_T_b37	rs6500487	1.3e-07	0.17	Artery - Aorta
ENSG00000051523.6	CYBA	16_88730007_G_A_b37	rs3829494	1.4e-07	-0.13	Nerve - Tibial
ENSG00000051523.6	CYBA	16_88727733_C_T_b37	rs6500487	1.4e-07	0.21	Stomach
ENSG00000051523.6	CYBA	16_88720611_G_A_b37	rs1017828	1.6e-07	-0.11	Skin - Sun Exposed (Lower leg)
ENSG00000051523.6	CYBA	16_88630804_T_A_b37	rs36001718	1.6e-07	-0.25	Artery - Aorta
ENSG00000051523.6	CYBA	16_88697487_G_A_b37	rs2291160	1.7e-07	-0.4	Pancreas
ENSG00000051523.6	CYBA	16_88717074_G_A_b37	rs3794624	1.7e-07	-0.17	Cells - Transformed fibroblasts
ENSG00000051523.6	CYBA	16_88754670_G_A_b37	rs4782422	1.8e-07	-0.62	Brain - Putamen (basal ganglia)
ENSG00000051523.6	CYBA	16_88715741_C_T_b37	rs62048002	2.3e-07	0.22	Cells - Transformed fibroblasts
ENSG00000051523.6	CYBA	16_88722898_G_C_b37	rs11639637	2.3e-07	0.21	Cells - Transformed fibroblasts
ENSG00000051523.6	CYBA	16_88717957_G_A_b37	rs13306296	2.5e-07	-0.22	Breast - Mammary Tissue
ENSG00000051523.6	CYBA	16_88733605_T_G_b37	rs13334987	2.6e-07	-0.1	Skin - Sun Exposed (Lower leg)
ENSG00000051523.6	CYBA	16_88767468_C_T_b37	rs4782425	2.8e-07	-0.1	Artery - Tibial
ENSG00000051523.6	CYBA	16_88733605_T_G_b37	rs13334987	2.8e-07	-0.097	Artery - Tibial
ENSG00000051523.6	CYBA	16_88716342_G_A_b37	rs35601559	2.8e-07	-0.11	Artery - Tibial
ENSG00000051523.6	CYBA	16_88716342_G_A_b37	rs35601559	2.8e-07	-0.18	Heart - Left Ventricle
ENSG00000051523.6	CYBA	16_88703061_G_T_b37	rs11646542	2.9e-07	-0.38	Pancreas
ENSG00000051523.6	CYBA	16_88733605_T_G_b37	rs13334987	3e-07	-0.2	Stomach
ENSG00000051523.6	CYBA	16_88729573_C_T_b37	rs3794625	3e-07	-0.27	Brain - Caudate (basal ganglia)
ENSG00000051523.6	CYBA	16_88718865_C_T_b37	rs8854	3.7e-07	0.43	Brain - Caudate (basal ganglia)
ENSG00000051523.6	CYBA	16_88681062_T_G_b37	rs4782381	3.9e-07	-0.38	Pancreas
ENSG00000051523.6	CYBA	16_88695338_C_G_b37	rs4782388	4.3e-07	-0.38	Pancreas
ENSG00000051523.6	CYBA	16_88695376_A_G_b37	rs4782307	4.3e-07	-0.38	Pancreas
ENSG00000051523.6	CYBA	16_88727519_T_C_b37	rs4782395	4.4e-07	-0.095	Artery - Tibial
ENSG00000051523.6	CYBA	16_88688832_A_G_b37	rs3751675	4.5e-07	0.37	Pancreas
ENSG00000051523.6	CYBA	16_88718865_C_T_b37	rs8854	4.5e-07	0.55	Brain - Nucleus accumbens (basal ganglia)
ENSG00000051523.6	CYBA	16_88761503_C_A_b37	rs72811459	4.6e-07	-0.17	Heart - Left Ventricle
ENSG00000051523.6	CYBA	16_88720611_G_A_b37	rs1017828	4.9e-07	-0.39	Brain - Nucleus accumbens (basal ganglia)
ENSG00000051523.6	CYBA	16_88720678_G_A_b37	rs1480333	4.9e-07	-0.39	Brain - Nucleus accumbens (basal ganglia)
ENSG00000051523.6	CYBA	16_88763151_G_A_b37	rs13556	5.3e-07	-0.21	Stomach
ENSG00000051523.6	CYBA	16_88766359_C_T_b37	rs11648894	5.5e-07	-0.1	Artery - Tibial
ENSG00000051523.6	CYBA	16_88734904_T_C_b37	rs8051150	5.5e-07	-0.17	Muscle - Skeletal
ENSG00000051523.6	CYBA	16_88633347_G_T_b37	rs8057773	5.8e-07	-0.37	Pancreas
ENSG00000051523.6	CYBA	16_88716394_C_A_b37	rs33997949	5.9e-07	-0.16	Adipose - Visceral (Omentum)
ENSG00000051523.6	CYBA	16_88763151_G_A_b37	rs13556	6e-07	-0.14	Nerve - Tibial
ENSG00000051523.6	CYBA	16_88716342_G_A_b37	rs35601559	6.4e-07	-0.26	Brain - Caudate (basal ganglia)
ENSG00000051523.6	CYBA	16_88768682_T_G_b37	rs11644923	6.6e-07	-0.17	Artery - Aorta
ENSG00000051523.6	CYBA	16_88732862_T_G_b37	rs9929039	6.7e-07	-0.095	Artery - Tibial
ENSG00000051523.6	CYBA	16_88762943_A_T_b37	rs1132579	6.9e-07	-0.47	Pancreas
ENSG00000051523.6	CYBA	16_88717074_G_A_b37	rs3794624	7.1e-07	-0.21	Heart - Atrial Appendage
ENSG00000051523.6	CYBA	16_87933615_C_A_b37	rs191699271	7.3e-07	-1.1	Brain - Frontal Cortex (BA9)
ENSG00000051523.6	CYBA	16_88715502_T_C_b37	rs12051199	7.3e-07	0.22	Cells - Transformed fibroblasts
ENSG00000051523.6	CYBA	16_88727519_T_C_b37	rs4782395	7.5e-07	-0.15	Adipose - Visceral (Omentum)
ENSG00000051523.6	CYBA	16_88757335_C_T_b37	rs8059815	7.5e-07	-0.19	Stomach
ENSG00000051523.6	CYBA	16_88716342_G_A_b37	rs35601559	7.6e-07	-0.22	Heart - Atrial Appendage
ENSG00000051523.6	CYBA	16_88760100_G_A_b37	rs11642704	7.6e-07	-0.17	Artery - Aorta
ENSG00000051523.6	CYBA	16_88718275_C_G_b37	rs16966671	7.7e-07	0.15	Cells - Transformed fibroblasts
ENSG00000051523.6	CYBA	16_88727733_C_T_b37	rs6500487	8.1e-07	0.24	Brain - Caudate (basal ganglia)
ENSG00000051523.6	CYBA	16_88729573_C_T_b37	rs3794625	9.2e-07	-0.099	Skin - Sun Exposed (Lower leg)
ENSG00000051523.6	CYBA	16_88633978_A_C_b37	rs4782451	9.8e-07	0.36	Pancreas
ENSG00000051523.6	CYBA	16_88720678_G_A_b37	rs1480333	9.9e-07	-0.17	Artery - Aorta
ENSG00000051523.6	CYBA	16_88730402_C_G_b37	rs3812950	1e-06	-0.14	Nerve - Tibial
ENSG00000051523.6	CYBA	16_88717074_G_A_b37	rs3794624	1e-06	-0.34	Brain - Putamen (basal ganglia)
ENSG00000051523.6	CYBA	16_88715485_ATG_A_b37		1e-06	0.39	Brain - Caudate (basal ganglia)
ENSG00000051523.6	CYBA	16_88715488_C_CAG_b37		1e-06	0.39	Brain - Caudate (basal ganglia)
ENSG00000051523.6	CYBA	16_88715490_C_T_b37	rs568194725	1e-06	0.39	Brain - Caudate (basal ganglia)
ENSG00000051523.6	CYBA	16_88743630_GT_G_b37		1e-06	-0.17	Heart - Left Ventricle
ENSG00000051523.6	CYBA	16_88743632_GGA_G_b37		1e-06	-0.17	Heart - Left Ventricle
ENSG00000051523.6	CYBA	16_88743636_AGAGGCCCAGAC_A_b37	rs752800349	1e-06	-0.17	Heart - Left Ventricle
ENSG00000051523.6	CYBA	16_88743648_C_T_b37	rs141364557	1e-06	-0.17	Heart - Left Ventricle
ENSG00000051523.6	CYBA	16_88753963_C_G_b37	rs7200064	1e-06	-0.19	Stomach
ENSG00000051523.6	CYBA	16_88722012_C_T_b37	rs3736112	1e-06	0.21	Cells - Transformed fibroblasts
ENSG00000051523.6	CYBA	16_88766359_C_T_b37	rs11648894	1.1e-06	-0.38	Brain - Putamen (basal ganglia)
ENSG00000051523.6	CYBA	16_88743630_GT_G_b37		1.2e-06	-0.2	Stomach
ENSG00000051523.6	CYBA	16_88743632_GGA_G_b37		1.2e-06	-0.2	Stomach
ENSG00000051523.6	CYBA	16_88743636_AGAGGCCCAGAC_A_b37	rs752800349	1.2e-06	-0.2	Stomach
ENSG00000051523.6	CYBA	16_88743648_C_T_b37	rs141364557	1.2e-06	-0.2	Stomach
ENSG00000051523.6	CYBA	16_88701780_C_A_b37	rs899729	1.3e-06	-0.36	Pancreas
ENSG00000051523.6	CYBA	16_88727519_T_C_b37	rs4782395	1.4e-06	-0.12	Nerve - Tibial
ENSG00000051523.6	CYBA	16_88722336_G_A_b37	rs3736111	1.5e-06	0.2	Cells - Transformed fibroblasts
ENSG00000051523.6	CYBA	16_88760963_G_A_b37	rs62049774	1.6e-06	0.11	Artery - Tibial
ENSG00000051523.6	CYBA	16_88715612_T_C_b37	rs12051202	1.7e-06	0.19	Cells - Transformed fibroblasts
ENSG00000051523.6	CYBA	16_88720611_G_A_b37	rs1017828	1.7e-06	-0.16	Artery - Aorta
ENSG00000051523.6	CYBA	16_88716342_G_A_b37	rs35601559	1.8e-06	-0.17	Cells - Transformed fibroblasts
ENSG00000051523.6	CYBA	16_88730354_A_G_b37	rs3812949	1.9e-06	-0.14	Nerve - Tibial
ENSG00000051523.6	CYBA	16_88760963_G_A_b37	rs62049774	2e-06	0.18	Cells - Transformed fibroblasts
ENSG00000051523.6	CYBA	16_88718275_C_G_b37	rs16966671	2e-06	0.13	Nerve - Tibial
ENSG00000051523.6	CYBA	16_88717957_G_A_b37	rs13306296	2e-06	-0.2	Heart - Atrial Appendage
ENSG00000051523.6	CYBA	16_88745891_C_T_b37	rs72811439	2.1e-06	-0.19	Stomach
ENSG00000051523.6	CYBA	16_88712767_A_G_b37	rs12933505	2.1e-06	-0.12	Nerve - Tibial
ENSG00000051523.6	CYBA	16_88727733_C_T_b37	rs6500487	2.1e-06	0.32	Brain - Nucleus accumbens (basal ganglia)
ENSG00000051523.6	CYBA	16_88740084_C_T_b37	rs11076697	2.1e-06	-0.091	Artery - Tibial
ENSG00000051523.6	CYBA	16_88762932_CT_C_b37	rs796606951	2.2e-06	0.18	Cells - Transformed fibroblasts
ENSG00000051523.6	CYBA	16_88763151_G_A_b37	rs13556	2.3e-06	-0.16	Heart - Left Ventricle
ENSG00000051523.6	CYBA	16_88739988_G_T_b37	rs11076696	2.3e-06	-0.091	Artery - Tibial
ENSG00000051523.6	CYBA	16_88729788_C_T_b37	rs3794628	2.4e-06	-0.38	Brain - Putamen (basal ganglia)
ENSG00000051523.6	CYBA	16_88767468_C_T_b37	rs4782425	2.4e-06	-0.16	Heart - Left Ventricle
ENSG00000051523.6	CYBA	16_88718865_C_T_b37	rs8854	2.4e-06	0.2	Nerve - Tibial
ENSG00000051523.6	CYBA	16_88729573_C_T_b37	rs3794625	2.5e-06	-0.38	Brain - Putamen (basal ganglia)
ENSG00000051523.6	CYBA	16_88716394_C_A_b37	rs33997949	2.6e-06	-0.091	Artery - Tibial
ENSG00000051523.6	CYBA	16_88634298_CA_C_b37	rs397855220	2.7e-06	-0.36	Pancreas
ENSG00000051523.6	CYBA	16_88762932_CT_C_b37	rs796606951	2.7e-06	0.11	Artery - Tibial
ENSG00000051523.6	CYBA	16_88743630_GT_G_b37		2.7e-06	-0.096	Artery - Tibial
ENSG00000051523.6	CYBA	16_88743632_GGA_G_b37		2.7e-06	-0.096	Artery - Tibial
ENSG00000051523.6	CYBA	16_88743636_AGAGGCCCAGAC_A_b37	rs752800349	2.7e-06	-0.096	Artery - Tibial
ENSG00000051523.6	CYBA	16_88743648_C_T_b37	rs141364557	2.7e-06	-0.096	Artery - Tibial
ENSG00000051523.6	CYBA	16_88672017_A_C_b37	rs4782379	2.8e-06	-0.35	Pancreas
ENSG00000051523.6	CYBA	16_88721012_G_A_b37	rs12935454	2.8e-06	-0.36	Brain - Nucleus accumbens (basal ganglia)
ENSG00000051523.6	CYBA	16_88743632_GGA_G_b37		2.9e-06	-0.39	Brain - Putamen (basal ganglia)
ENSG00000051523.6	CYBA	16_88743636_AGAGGCCCAGAC_A_b37	rs752800349	2.9e-06	-0.39	Brain - Putamen (basal ganglia)
ENSG00000051523.6	CYBA	16_88743648_C_T_b37	rs141364557	2.9e-06	-0.39	Brain - Putamen (basal ganglia)
ENSG00000051523.6	CYBA	16_88763958_G_A_b37	rs11076700	2.9e-06	0.11	Artery - Tibial
ENSG00000051523.6	CYBA	16_88765174_T_G_b37	rs78069475	2.9e-06	-0.33	Cells - Transformed fibroblasts
ENSG00000051523.6	CYBA	16_88743630_GT_G_b37		3e-06	-0.38	Brain - Putamen (basal ganglia)
ENSG00000051523.6	CYBA	16_88767468_C_T_b37	rs4782425	3e-06	-0.37	Brain - Putamen (basal ganglia)
ENSG00000051523.6	CYBA	16_88761503_C_A_b37	rs72811459	3.1e-06	-0.093	Artery - Tibial
ENSG00000051523.6	CYBA	16_88744234_CGTG_C_b37	rs377086685	3.2e-06	-0.091	Artery - Tibial
ENSG00000051523.6	CYBA	16_88750790_C_T_b37	rs8050696	3.2e-06	-0.15	Heart - Left Ventricle
ENSG00000051523.6	CYBA	16_88750790_C_T_b37	rs8050696	3.2e-06	-0.18	Stomach
ENSG00000051523.6	CYBA	16_88780488_C_G_b37	rs74880807	3.3e-06	-0.55	Brain - Caudate (basal ganglia)
ENSG00000051523.6	CYBA	16_88761503_C_A_b37	rs72811459	3.3e-06	-0.15	Cells - Transformed fibroblasts
ENSG00000051523.6	CYBA	16_88664758_T_C_b37	rs3887592	3.4e-06	-0.36	Pancreas
ENSG00000051523.6	CYBA	16_88763958_G_A_b37	rs11076700	3.4e-06	0.45	Pancreas
ENSG00000051523.6	CYBA	16_88718275_C_G_b37	rs16966671	3.5e-06	0.14	Adipose - Visceral (Omentum)
ENSG00000051523.6	CYBA	16_88713236_A_G_b37	rs4673	3.5e-06	-0.12	Nerve - Tibial
ENSG00000051523.6	CYBA	16_88760100_G_A_b37	rs11642704	3.6e-06	-0.089	Artery - Tibial
ENSG00000051523.6	CYBA	16_88757341_A_G_b37	rs9932972	3.6e-06	0.16	Cells - Transformed fibroblasts
ENSG00000051523.6	CYBA	16_88760100_G_A_b37	rs11642704	3.7e-06	-0.16	Heart - Left Ventricle
ENSG00000051523.6	CYBA	16_88729788_C_T_b37	rs3794628	3.7e-06	-0.19	Stomach
ENSG00000051523.6	CYBA	16_88728513_A_G_b37	rs12933657	3.7e-06	0.19	Cells - Transformed fibroblasts
ENSG00000051523.6	CYBA	16_88720074_A_G_b37	rs11649119	3.7e-06	0.18	Cells - Transformed fibroblasts
ENSG00000051523.6	CYBA	16_88733605_T_G_b37	rs13334987	3.8e-06	-0.18	Breast - Mammary Tissue
ENSG00000051523.6	CYBA	16_88719877_C_G_b37	rs12926212	3.9e-06	-0.36	Brain - Nucleus accumbens (basal ganglia)
ENSG00000051523.6	CYBA	16_88757335_C_T_b37	rs8059815	3.9e-06	-0.09	Artery - Tibial
ENSG00000051523.6	CYBA	16_88639659_G_C_b37	rs62050269	4e-06	0.39	Pancreas
ENSG00000051523.6	CYBA	16_88640165_A_G_b37	rs62050270	4e-06	0.39	Pancreas
ENSG00000051523.6	CYBA	16_88713236_A_G_b37	rs4673	4.1e-06	-0.16	Artery - Aorta
ENSG00000051523.6	CYBA	16_88718275_C_G_b37	rs16966671	4.2e-06	0.15	Heart - Left Ventricle
ENSG00000051523.6	CYBA	16_88717074_G_A_b37	rs3794624	4.2e-06	-0.097	Adipose - Subcutaneous
ENSG00000051523.6	CYBA	16_88712780_A_C_b37	rs12933512	4.3e-06	-0.12	Nerve - Tibial
ENSG00000051523.6	CYBA	16_88712782_A_G_b37	rs12709103	4.3e-06	-0.12	Nerve - Tibial
ENSG00000051523.6	CYBA	16_88761503_C_A_b37	rs72811459	4.3e-06	-0.33	Brain - Nucleus accumbens (basal ganglia)
ENSG00000051523.6	CYBA	16_88733700_C_A_b37	rs12444691	4.4e-06	0.19	Cells - Transformed fibroblasts
ENSG00000051523.6	CYBA	16_88733605_T_G_b37	rs13334987	4.4e-06	-0.31	Brain - Nucleus accumbens (basal ganglia)
ENSG00000051523.6	CYBA	16_88664758_T_C_b37	rs3887592	4.4e-06	-0.14	Esophagus - Muscularis
ENSG00000051523.6	CYBA	16_88732862_T_G_b37	rs9929039	4.5e-06	-0.094	Skin - Sun Exposed (Lower leg)
ENSG00000051523.6	CYBA	16_88768682_T_G_b37	rs11644923	4.5e-06	-0.15	Heart - Left Ventricle
ENSG00000051523.6	CYBA	16_88721012_G_A_b37	rs12935454	4.5e-06	-0.092	Skin - Sun Exposed (Lower leg)
ENSG00000051523.6	CYBA	16_88715741_C_T_b37	rs62048002	4.5e-06	0.13	Adipose - Subcutaneous
ENSG00000051523.6	CYBA	16_88767468_C_T_b37	rs4782425	4.5e-06	-0.14	Nerve - Tibial
ENSG00000051523.6	CYBA	16_88713473_G_A_b37	rs4782308	4.6e-06	-0.12	Nerve - Tibial
ENSG00000051523.6	CYBA	16_88761503_C_A_b37	rs72811459	4.6e-06	-0.13	Nerve - Tibial
ENSG00000051523.6	CYBA	16_88692204_T_TGAC_b37	rs71391399	4.7e-06	0.34	Pancreas
ENSG00000051523.6	CYBA	16_88733605_T_G_b37	rs13334987	4.8e-06	-0.21	Colon - Sigmoid
ENSG00000051523.6	CYBA	16_88717074_G_A_b37	rs3794624	4.9e-06	-0.14	Adipose - Visceral (Omentum)
ENSG00000051523.6	CYBA	16_87822082_G_C_b37	rs77063151	4.9e-06	-0.29	Adipose - Subcutaneous
ENSG00000051523.6	CYBA	16_88730861_C_G_b37	rs73258681	5e-06	-0.7	Thyroid
ENSG00000051523.6	CYBA	16_88725967_G_A_b37	rs73258669	5.2e-06	-0.7	Thyroid
ENSG00000051523.6	CYBA	16_88727803_T_A_b37	rs7204006	5.2e-06	-0.7	Thyroid
ENSG00000051523.6	CYBA	16_88728594_A_G_b37	rs8061869	5.2e-06	-0.7	Thyroid
ENSG00000051523.6	CYBA	16_88731738_T_G_b37	rs8064137	5.2e-06	-0.7	Thyroid
ENSG00000051523.6	CYBA	16_88745891_C_T_b37	rs72811439	5.4e-06	-0.088	Artery - Tibial
ENSG00000051523.6	CYBA	16_88717074_G_A_b37	rs3794624	5.5e-06	-0.2	Breast - Mammary Tissue
ENSG00000051523.6	CYBA	16_88743632_GGA_G_b37		5.8e-06	-0.33	Brain - Nucleus accumbens (basal ganglia)
ENSG00000051523.6	CYBA	16_88743636_AGAGGCCCAGAC_A_b37	rs752800349	5.8e-06	-0.33	Brain - Nucleus accumbens (basal ganglia)
ENSG00000051523.6	CYBA	16_88743648_C_T_b37	rs141364557	5.8e-06	-0.33	Brain - Nucleus accumbens (basal ganglia)
ENSG00000051523.6	CYBA	16_88719625_A_T_b37	rs11648950	5.9e-06	0.17	Cells - Transformed fibroblasts
ENSG00000051523.6	CYBA	16_88760100_G_A_b37	rs11642704	5.9e-06	-0.34	Brain - Putamen (basal ganglia)
ENSG00000051523.6	CYBA	16_88758518_C_T_b37	rs72811456	6.1e-06	-0.085	Artery - Tibial
ENSG00000051523.6	CYBA	16_88744234_CGTG_C_b37	rs377086685	6.4e-06	-0.18	Stomach
ENSG00000051523.6	CYBA	16_88626846_T_C_b37	rs72807493	6.5e-06	0.68	Pancreas
ENSG00000051523.6	CYBA	16_88745891_C_T_b37	rs72811439	6.7e-06	-0.16	Artery - Aorta
ENSG00000051523.6	CYBA	16_88763151_G_A_b37	rs13556	6.7e-06	-0.15	Cells - Transformed fibroblasts
ENSG00000051523.6	CYBA	16_88745891_C_T_b37	rs72811439	6.7e-06	-0.38	Brain - Putamen (basal ganglia)
ENSG00000051523.6	CYBA	16_88727733_C_T_b37	rs6500487	6.8e-06	0.085	Artery - Tibial
ENSG00000051523.6	CYBA	16_88754869_C_T_b37	rs880970	6.9e-06	0.17	Cells - Transformed fibroblasts
ENSG00000051523.6	CYBA	16_88766976_C_CT_b37	rs149328410	6.9e-06	0.18	Cells - Transformed fibroblasts
ENSG00000051523.6	CYBA	16_88739988_G_T_b37	rs11076696	6.9e-06	-0.18	Stomach
ENSG00000051523.6	CYBA	16_88768682_T_G_b37	rs11644923	7.1e-06	-0.087	Artery - Tibial
ENSG00000051523.6	CYBA	16_88753963_C_G_b37	rs7200064	7.2e-06	-0.38	Brain - Putamen (basal ganglia)
ENSG00000051523.6	CYBA	16_88761503_C_A_b37	rs72811459	7.2e-06	-0.18	Stomach
ENSG00000051523.6	CYBA	16_88729788_C_T_b37	rs3794628	7.2e-06	-0.15	Cells - Transformed fibroblasts
ENSG00000051523.6	CYBA	16_88733605_T_G_b37	rs13334987	7.2e-06	-0.14	Artery - Aorta
ENSG00000051523.6	CYBA	16_88758458_C_A_b37	rs62048041	7.3e-06	0.11	Artery - Tibial
ENSG00000051523.6	CYBA	16_88753963_C_G_b37	rs7200064	7.3e-06	-0.15	Heart - Left Ventricle
ENSG00000051523.6	CYBA	16_88743630_GT_G_b37		7.3e-06	-0.33	Brain - Nucleus accumbens (basal ganglia)
ENSG00000051523.6	CYBA	16_88766973_G_C_b37	rs2340970	7.6e-06	0.17	Cells - Transformed fibroblasts
ENSG00000051523.6	CYBA	16_88736363_A_G_b37	rs12929177	7.6e-06	-0.15	Muscle - Skeletal
ENSG00000051523.6	CYBA	16_88750790_C_T_b37	rs8050696	7.7e-06	-0.088	Artery - Tibial
ENSG00000051523.6	CYBA	16_88766976_C_CT_b37	rs149328410	7.8e-06	0.11	Artery - Tibial
ENSG00000051523.6	CYBA	16_88734904_T_C_b37	rs8051150	7.8e-06	-0.093	Skin - Sun Exposed (Lower leg)
ENSG00000051523.6	CYBA	16_88722898_G_C_b37	rs11639637	7.8e-06	0.12	Adipose - Subcutaneous
ENSG00000051523.6	CYBA	16_88720611_G_A_b37	rs1017828	8e-06	-0.088	Artery - Tibial
ENSG00000051523.6	CYBA	16_88763151_G_A_b37	rs13556	8.6e-06	-0.091	Skin - Sun Exposed (Lower leg)
ENSG00000051523.6	CYBA	16_88718865_C_T_b37	rs8854	8.7e-06	0.15	Skin - Sun Exposed (Lower leg)
ENSG00000051523.6	CYBA	16_88740084_C_T_b37	rs11076697	8.7e-06	-0.18	Stomach
ENSG00000051523.6	CYBA	16_88672017_A_C_b37	rs4782379	9e-06	-0.13	Esophagus - Muscularis
ENSG00000051523.6	CYBA	16_88715612_T_C_b37	rs12051202	9e-06	0.18	Thyroid
ENSG00000051523.6	CYBA	16_88719877_C_G_b37	rs12926212	9.2e-06	-0.14	Muscle - Skeletal
ENSG00000051523.6	CYBA	16_88732862_T_G_b37	rs9929039	9.3e-06	-0.31	Brain - Nucleus accumbens (basal ganglia)
ENSG00000051523.6	CYBA	16_88754670_G_A_b37	rs4782422	9.5e-06	-0.52	Brain - Nucleus accumbens (basal ganglia)
ENSG00000051523.6	CYBA	16_88741504_G_C_b37	rs1056707	9.7e-06	0.13	Cells - Transformed fibroblasts
ENSG00000051523.6	CYBA	16_88724347_G_T_b37	rs2279258	9.9e-06	-0.12	Nerve - Tibial
ENSG00000051523.6	CYBA	16_88763958_G_A_b37	rs11076700	9.9e-06	0.17	Cells - Transformed fibroblasts
ENSG00000051523.6	CYBA	16_88760963_G_A_b37	rs62049774	9.9e-06	0.43	Pancreas
ENSG00000051523.6	CYBA	16_88719877_C_G_b37	rs12926212	1e-05	-0.089	Skin - Sun Exposed (Lower leg)
ENSG00000051523.6	CYBA	16_88155675_T_C_b37	rs565573904	1e-05	0.26	Heart - Left Ventricle
ENSG00000051523.6	CYBA	16_88739988_G_T_b37	rs11076696	1e-05	-0.15	Artery - Aorta
ENSG00000051523.6	CYBA	16_88732862_T_G_b37	rs9929039	1e-05	-0.17	Stomach
ENSG00000051523.6	CYBA	16_88750790_C_T_b37	rs8050696	1.1e-05	-0.15	Artery - Aorta
ENSG00000051523.6	CYBA	16_88768098_G_A_b37	rs112125845	1.1e-05	0.17	Cells - Transformed fibroblasts
ENSG00000051523.6	CYBA	16_88753963_C_G_b37	rs7200064	1.1e-05	-0.087	Artery - Tibial
ENSG00000051523.6	CYBA	16_88645931_T_C_b37	rs72809423	1.1e-05	0.69	Pancreas
ENSG00000051523.6	CYBA	16_88718865_C_T_b37	rs8854	1.1e-05	0.23	Muscle - Skeletal
ENSG00000051523.6	CYBA	16_88713473_G_A_b37	rs4782308	1.1e-05	-0.15	Artery - Aorta
ENSG00000051523.6	CYBA	16_88712780_A_C_b37	rs12933512	1.1e-05	-0.14	Artery - Aorta
ENSG00000051523.6	CYBA	16_88712782_A_G_b37	rs12709103	1.1e-05	-0.14	Artery - Aorta
ENSG00000051523.6	CYBA	16_88743630_GT_G_b37		1.2e-05	-0.13	Nerve - Tibial
ENSG00000051523.6	CYBA	16_88743632_GGA_G_b37		1.2e-05	-0.13	Nerve - Tibial
ENSG00000051523.6	CYBA	16_88743636_AGAGGCCCAGAC_A_b37	rs752800349	1.2e-05	-0.13	Nerve - Tibial
ENSG00000051523.6	CYBA	16_88743648_C_T_b37	rs141364557	1.2e-05	-0.13	Nerve - Tibial
ENSG00000051523.6	CYBA	16_88716342_G_A_b37	rs35601559	1.2e-05	-0.14	Skin - Not Sun Exposed (Suprapubic)
ENSG00000051523.6	CYBA	16_88712767_A_G_b37	rs12933505	1.2e-05	-0.15	Artery - Aorta
ENSG00000051523.6	CYBA	16_89455482_G_C_b37	rs111258579	1.2e-05	0.66	Heart - Left Ventricle
ENSG00000051523.6	CYBA	16_88743632_GGA_G_b37		1.2e-05	-0.15	Cells - Transformed fibroblasts
ENSG00000051523.6	CYBA	16_88743636_AGAGGCCCAGAC_A_b37	rs752800349	1.2e-05	-0.15	Cells - Transformed fibroblasts
ENSG00000051523.6	CYBA	16_88743648_C_T_b37	rs141364557	1.2e-05	-0.15	Cells - Transformed fibroblasts
ENSG00000051523.6	CYBA	16_88730088_G_GGCCGTGGGGCGCTGTGCGGGT_b37	rs71158740	1.2e-05	-0.18	Cells - Transformed fibroblasts
ENSG00000051523.6	CYBA	16_88745891_C_T_b37	rs72811439	1.3e-05	-0.14	Heart - Left Ventricle
ENSG00000051523.6	CYBA	16_88766359_C_T_b37	rs11648894	1.3e-05	-0.23	Brain - Caudate (basal ganglia)
ENSG00000051523.6	CYBA	16_88760100_G_A_b37	rs11642704	1.3e-05	-0.13	Nerve - Tibial
ENSG00000051523.6	CYBA	16_88715502_T_C_b37	rs12051199	1.3e-05	0.12	Adipose - Subcutaneous
ENSG00000051523.6	CYBA	16_88715612_T_C_b37	rs12051202	1.3e-05	0.12	Adipose - Subcutaneous
ENSG00000051523.6	CYBA	16_88763896_G_A_b37	rs2879899	1.3e-05	0.42	Pancreas
ENSG00000051523.6	CYBA	16_88656638_G_T_b37	rs4782505	1.4e-05	-0.33	Pancreas
ENSG00000051523.6	CYBA	16_88768682_T_G_b37	rs11644923	1.4e-05	-0.12	Nerve - Tibial
ENSG00000051523.6	CYBA	16_88727733_C_T_b37	rs6500487	1.4e-05	0.32	Pancreas
ENSG00000051523.6	CYBA	16_88759441_G_A_b37	rs11642407	1.4e-05	0.41	Pancreas
ENSG00000051523.6	CYBA	16_88759444_G_A_b37	rs11642408	1.4e-05	0.41	Pancreas
ENSG00000051523.6	CYBA	16_88727733_C_T_b37	rs6500487	1.4e-05	0.087	Adipose - Subcutaneous
ENSG00000051523.6	CYBA	16_88766359_C_T_b37	rs11648894	1.4e-05	-0.13	Nerve - Tibial
ENSG00000051523.6	CYBA	16_88655229_G_A_b37	rs72809433	1.4e-05	0.71	Pancreas
ENSG00000051523.6	CYBA	16_88155676_G_A_b37	rs577124009	1.4e-05	0.26	Heart - Left Ventricle
ENSG00000051523.6	CYBA	16_88192009_C_T_b37	rs12924042	1.4e-05	0.38	Pancreas
ENSG00000051523.6	CYBA	16_88634287_C_T_b37	rs62050267	1.5e-05	-0.33	Pancreas
ENSG00000051523.6	CYBA	16_88757642_C_T_b37	rs28718611	1.5e-05	0.16	Cells - Transformed fibroblasts
ENSG00000051523.6	CYBA	16_88717074_G_A_b37	rs3794624	1.5e-05	-0.2	Colon - Sigmoid
ENSG00000051523.6	CYBA	16_88744234_CGTG_C_b37	rs377086685	1.5e-05	-0.14	Heart - Left Ventricle
ENSG00000051523.6	CYBA	16_88744234_CGTG_C_b37	rs377086685	1.6e-05	-0.15	Artery - Aorta
ENSG00000051523.6	CYBA	16_88719425_A_G_b37	rs62048037	1.6e-05	0.16	Cells - Transformed fibroblasts
ENSG00000051523.6	CYBA	16_88720678_G_A_b37	rs1480333	1.6e-05	-0.085	Artery - Tibial
ENSG00000051523.6	CYBA	16_88766359_C_T_b37	rs11648894	1.7e-05	-0.15	Heart - Left Ventricle
ENSG00000051523.6	CYBA	16_88729650_T_C_b37	rs11646758	1.7e-05	0.18	Cells - Transformed fibroblasts
ENSG00000051523.6	CYBA	16_88728903_G_C_b37	rs4782396	1.8e-05	-0.11	Artery - Tibial
ENSG00000051523.6	CYBA	16_88740084_C_T_b37	rs11076697	1.8e-05	-0.15	Artery - Aorta
ENSG00000051523.6	CYBA	16_88762506_A_C_b37	rs11863597	1.9e-05	0.093	Artery - Tibial
ENSG00000051523.6	CYBA	16_88757335_C_T_b37	rs8059815	1.9e-05	-0.13	Cells - Transformed fibroblasts
ENSG00000051523.6	CYBA	16_88743485_A_G_b37	rs11862024	2e-05	0.16	Cells - Transformed fibroblasts
ENSG00000051523.6	CYBA	16_88766973_G_C_b37	rs2340970	2e-05	0.1	Artery - Tibial
ENSG00000051523.6	CYBA	16_88742585_G_T_b37	rs11645983	2e-05	0.16	Cells - Transformed fibroblasts
ENSG00000051523.6	CYBA	16_88759207_C_G_b37	rs11646325	2e-05	0.15	Cells - Transformed fibroblasts
ENSG00000051523.6	CYBA	16_88732862_T_G_b37	rs9929039	2e-05	-0.12	Nerve - Tibial
ENSG00000051523.6	CYBA	16_88768682_T_G_b37	rs11644923	2e-05	-0.085	Skin - Sun Exposed (Lower leg)
ENSG00000051523.6	CYBA	16_88727519_T_C_b37	rs4782395	2e-05	-0.087	Adipose - Subcutaneous
ENSG00000051523.6	CYBA	16_88717074_G_A_b37	rs3794624	2.1e-05	-0.13	Thyroid
ENSG00000051523.6	CYBA	16_88757755_C_T_b37	rs57577962	2.1e-05	0.1	Artery - Tibial
ENSG00000051523.6	CYBA	16_88716342_G_A_b37	rs35601559	2.1e-05	-0.15	Esophagus - Muscularis
ENSG00000051523.6	CYBA	16_88757755_C_T_b37	rs57577962	2.1e-05	0.1	Adipose - Subcutaneous
ENSG00000051523.6	CYBA	16_88722898_G_C_b37	rs11639637	2.1e-05	0.12	Artery - Tibial
ENSG00000051523.6	CYBA	16_88807608_A_G_b37	rs750739	2.2e-05	-0.11	Skin - Sun Exposed (Lower leg)
ENSG00000051523.6	CYBA	16_88735914_C_G_b37	rs11076694	2.2e-05	0.18	Cells - Transformed fibroblasts
ENSG00000051523.6	CYBA	16_88717957_G_A_b37	rs13306296	2.2e-05	-0.13	Thyroid
ENSG00000051523.6	CYBA	16_88754670_G_A_b37	rs4782422	2.2e-05	-0.23	Artery - Aorta
ENSG00000051523.6	CYBA	16_88743630_GT_G_b37		2.4e-05	-0.14	Cells - Transformed fibroblasts
ENSG00000051523.6	CYBA	16_88716394_C_A_b37	rs33997949	2.5e-05	-0.13	Cells - Transformed fibroblasts
ENSG00000051523.6	CYBA	16_88750790_C_T_b37	rs8050696	2.5e-05	-0.13	Cells - Transformed fibroblasts
ENSG00000051523.6	CYBA	16_88756788_C_G_b37	rs11642292	2.6e-05	0.16	Cells - Transformed fibroblasts
ENSG00000051523.6	CYBA	16_88763896_G_A_b37	rs2879899	2.6e-05	0.1	Artery - Tibial
ENSG00000051523.6	CYBA	16_87822464_T_C_b37	rs79483911	2.6e-05	-0.28	Adipose - Subcutaneous
ENSG00000051523.6	CYBA	16_87823054_T_C_b37	rs61161228	2.6e-05	-0.28	Adipose - Subcutaneous
ENSG00000051523.6	CYBA	16_87823230_G_A_b37	rs56120818	2.6e-05	-0.28	Adipose - Subcutaneous
ENSG00000051523.6	CYBA	16_87824079_C_T_b37	rs6540081	2.6e-05	-0.28	Adipose - Subcutaneous
ENSG00000051523.6	CYBA	16_88759444_G_A_b37	rs11642408	2.6e-05	0.1	Artery - Tibial
ENSG00000051523.6	CYBA	16_88753963_C_G_b37	rs7200064	2.7e-05	-0.13	Cells - Transformed fibroblasts
ENSG00000051523.6	CYBA	16_88754670_G_A_b37	rs4782422	2.7e-05	-0.21	Cells - Transformed fibroblasts
ENSG00000051523.6	CYBA	16_88737433_C_T_b37	rs11647276	2.8e-05	0.17	Cells - Transformed fibroblasts
ENSG00000051523.6	CYBA	16_88737564_A_G_b37	rs3924275	2.8e-05	0.17	Cells - Transformed fibroblasts
ENSG00000051523.6	CYBA	16_88720611_G_A_b37	rs1017828	2.8e-05	-0.14	Muscle - Skeletal
ENSG00000051523.6	CYBA	16_88722336_G_A_b37	rs3736111	2.8e-05	0.11	Adipose - Subcutaneous
ENSG00000051523.6	CYBA	16_88729876_G_A_b37	rs3794629	2.8e-05	-0.11	Nerve - Tibial
ENSG00000051523.6	CYBA	16_88734268_A_G_b37	rs4420519	2.8e-05	-0.14	Muscle - Skeletal
ENSG00000051523.6	CYBA	16_88760100_G_A_b37	rs11642704	2.9e-05	-0.086	Skin - Sun Exposed (Lower leg)
ENSG00000051523.6	CYBA	16_88759441_G_A_b37	rs11642407	3e-05	0.16	Cells - Transformed fibroblasts
ENSG00000051523.6	CYBA	16_88763896_G_A_b37	rs2879899	3e-05	0.16	Cells - Transformed fibroblasts
ENSG00000051523.6	CYBA	16_88757755_C_T_b37	rs57577962	3.1e-05	0.16	Cells - Transformed fibroblasts
ENSG00000051523.6	CYBA	16_88718275_C_G_b37	rs16966671	3.1e-05	0.078	Artery - Tibial
ENSG00000051523.6	CYBA	16_89148643_C_T_b37	rs9935216	3.2e-05	0.1	Skin - Sun Exposed (Lower leg)
ENSG00000051523.6	CYBA	16_88759444_G_A_b37	rs11642408	3.2e-05	0.16	Cells - Transformed fibroblasts
ENSG00000051523.6	CYBA	16_88761231_C_A_b37	rs57350670	3.2e-05	0.088	Artery - Tibial
ENSG00000051523.6	CYBA	16_88730402_C_G_b37	rs3812950	3.3e-05	-0.091	Artery - Tibial
ENSG00000051523.6	CYBA	16_88735914_C_G_b37	rs11076694	3.3e-05	0.11	Artery - Tibial
ENSG00000051523.6	CYBA	16_88849754_G_A_b37	rs76327864	3.3e-05	-0.12	Artery - Tibial
ENSG00000051523.6	CYBA	16_88754670_G_A_b37	rs4782422	3.4e-05	-0.14	Skin - Sun Exposed (Lower leg)
ENSG00000051523.6	CYBA	16_88766359_C_T_b37	rs11648894	3.6e-05	-0.088	Skin - Sun Exposed (Lower leg)
ENSG00000051523.6	CYBA	16_89146775_G_A_b37	rs9921653	3.8e-05	0.1	Skin - Sun Exposed (Lower leg)

## Sheet: GTEx_CYBB
Gencode Id	Gene Symbol	Variant Id	SNP Id	P-Value	NES	Tissue
ENSG00000165168.6	CYBB	X_37629455_G_C_b37	rs140097659	6.9e-08	0.46	Cells - EBV-transformed lymphocytes
ENSG00000165168.6	CYBB	X_37563811_G_A_b37	rs7053065	1.2e-07	0.44	Cells - EBV-transformed lymphocytes
ENSG00000165168.6	CYBB	X_37623375_C_CA_b37	rs370105882	1.5e-07	0.43	Cells - EBV-transformed lymphocytes
ENSG00000165168.6	CYBB	X_37587804_A_T_b37	rs2230148	1.7e-07	0.42	Cells - EBV-transformed lymphocytes
ENSG00000165168.6	CYBB	X_37655735_TAAAC_T_b37	rs35574346	2.1e-07	0.41	Cells - EBV-transformed lymphocytes
ENSG00000165168.6	CYBB	X_37658455_A_G_b37	rs5964125	2.3e-07	0.41	Cells - EBV-transformed lymphocytes
ENSG00000165168.6	CYBB	X_37596016_C_A_b37	rs17312170	2.5e-07	0.41	Cells - EBV-transformed lymphocytes
ENSG00000165168.6	CYBB	X_37606277_G_C_b37	rs17312177	2.5e-07	0.41	Cells - EBV-transformed lymphocytes
ENSG00000165168.6	CYBB	X_37621344_G_A_b37	rs5964066	2.5e-07	0.41	Cells - EBV-transformed lymphocytes
ENSG00000165168.6	CYBB	X_37673219_G_T_b37	rs5963327	2.5e-07	0.41	Cells - EBV-transformed lymphocytes
ENSG00000165168.6	CYBB	X_37679803_G_A_b37	rs9330580	2.5e-07	0.41	Cells - EBV-transformed lymphocytes
ENSG00000165168.6	CYBB	X_37659056_A_G_b37	rs5963309	2.5e-07	0.41	Cells - EBV-transformed lymphocytes
ENSG00000165168.6	CYBB	X_37619114_G_A_b37	rs7884397	2.9e-07	0.41	Cells - EBV-transformed lymphocytes
ENSG00000165168.6	CYBB	X_37628858_C_G_b37	rs7056501	3.5e-07	0.43	Cells - EBV-transformed lymphocytes
ENSG00000165168.6	CYBB	X_37567168_C_A_b37	rs12012499	3.8e-07	0.41	Cells - EBV-transformed lymphocytes
ENSG00000165168.6	CYBB	X_37633447_C_T_b37	rs7054356	4e-07	0.41	Cells - EBV-transformed lymphocytes
ENSG00000165168.6	CYBB	X_37571543_C_G_b37	rs5963985	4.2e-07	0.41	Cells - EBV-transformed lymphocytes
ENSG00000165168.6	CYBB	X_37544115_T_C_b37	rs72619420	4.3e-07	0.41	Cells - EBV-transformed lymphocytes
ENSG00000165168.6	CYBB	X_37667431_T_C_b37	rs7886998	5.2e-07	0.4	Cells - EBV-transformed lymphocytes
ENSG00000165168.6	CYBB	X_37496370_A_G_b37	rs3126417	5.2e-07	0.38	Cells - EBV-transformed lymphocytes
ENSG00000165168.6	CYBB	X_37519117_A_G_b37	rs147417545	5.3e-07	0.61	Cells - EBV-transformed lymphocytes
ENSG00000165168.6	CYBB	X_37632252_G_A_b37	rs142096230	5.6e-07	0.46	Cells - EBV-transformed lymphocytes
ENSG00000165168.6	CYBB	X_37664811_A_G_b37	rs35773320	5.9e-07	0.41	Cells - EBV-transformed lymphocytes
ENSG00000165168.6	CYBB	X_37497896_G_A_b37	rs3126419	6.9e-07	0.41	Cells - EBV-transformed lymphocytes
ENSG00000165168.6	CYBB	X_37629853_A_C_b37	rs5964072	7e-07	0.41	Cells - EBV-transformed lymphocytes
ENSG00000165168.6	CYBB	X_37506276_A_G_b37	rs146200166	7.1e-07	0.42	Cells - EBV-transformed lymphocytes
ENSG00000165168.6	CYBB	X_37654136_T_C_b37	rs12014060	7.8e-07	0.4	Cells - EBV-transformed lymphocytes
ENSG00000165168.6	CYBB	X_37491749_G_A_b37	rs144787822	7.9e-07	0.42	Cells - EBV-transformed lymphocytes
ENSG00000165168.6	CYBB	X_37591065_A_T_b37	rs17312163	8.6e-07	0.41	Cells - EBV-transformed lymphocytes
ENSG00000165168.6	CYBB	X_37670729_T_G_b37	rs5964151	9.7e-07	0.41	Cells - EBV-transformed lymphocytes
ENSG00000165168.6	CYBB	X_37696553_T_C_b37	rs7055948	1.1e-06	0.3	Esophagus - Gastroesophageal Junction
ENSG00000165168.6	CYBB	X_37531015_T_G_b37	rs5963221	1.2e-06	0.41	Cells - EBV-transformed lymphocytes
ENSG00000165168.6	CYBB	X_37518806_C_T_b37	rs12009345	1.3e-06	0.38	Cells - EBV-transformed lymphocytes
ENSG00000165168.6	CYBB	X_37683852_T_C_b37	rs5963337	1.3e-06	0.38	Cells - EBV-transformed lymphocytes
ENSG00000165168.6	CYBB	X_37508670_A_G_b37	rs5918046	1.4e-06	0.38	Cells - EBV-transformed lymphocytes
ENSG00000165168.6	CYBB	X_37685691_A_G_b37	rs7884670	1.4e-06	0.38	Cells - EBV-transformed lymphocytes
ENSG00000165168.6	CYBB	X_37685695_T_C_b37	rs7888889	1.4e-06	0.38	Cells - EBV-transformed lymphocytes
ENSG00000165168.6	CYBB	X_37578411_A_G_b37	rs5964000	1.5e-06	0.4	Cells - EBV-transformed lymphocytes
ENSG00000165168.6	CYBB	X_37633165_G_A_b37	rs7057754	1.5e-06	0.45	Cells - EBV-transformed lymphocytes
ENSG00000165168.6	CYBB	X_37659562_T_A_b37	rs5963310	1.7e-06	0.38	Cells - EBV-transformed lymphocytes
ENSG00000165168.6	CYBB	X_37651663_T_C_b37	rs4827298	1.8e-06	0.4	Cells - EBV-transformed lymphocytes
ENSG00000165168.6	CYBB	X_37644425_C_G_b37	rs6520785	1.8e-06	0.39	Cells - EBV-transformed lymphocytes
ENSG00000165168.6	CYBB	X_37696519_G_A_b37	rs7066115	1.8e-06	0.39	Cells - EBV-transformed lymphocytes
ENSG00000165168.6	CYBB	X_37538866_C_T_b37	rs12393823	1.8e-06	0.39	Cells - EBV-transformed lymphocytes
ENSG00000165168.6	CYBB	X_37494585_T_C_b37	rs3117505	1.9e-06	0.39	Cells - EBV-transformed lymphocytes
ENSG00000165168.6	CYBB	X_37509925_T_C_b37	rs5963867	2e-06	0.4	Cells - EBV-transformed lymphocytes
ENSG00000165168.6	CYBB	X_37619291_T_A_b37	rs7891950	2e-06	0.41	Cells - EBV-transformed lymphocytes
ENSG00000165168.6	CYBB	X_37685301_C_G_b37	rs4486340	2e-06	0.37	Cells - EBV-transformed lymphocytes
ENSG00000165168.6	CYBB	X_37643379_C_T_b37	rs6417871	2.1e-06	0.39	Cells - EBV-transformed lymphocytes
ENSG00000165168.6	CYBB	X_37680020_T_C_b37	rs72619430	2.3e-06	0.39	Cells - EBV-transformed lymphocytes
ENSG00000165168.6	CYBB	X_37644467_A_AAAG_b37	rs10644031	2.3e-06	0.37	Cells - EBV-transformed lymphocytes
ENSG00000165168.6	CYBB	X_37688620_G_A_b37	rs7052496	2.3e-06	0.37	Cells - EBV-transformed lymphocytes
ENSG00000165168.6	CYBB	X_37629064_C_A_b37	rs112521811	2.3e-06	0.4	Cells - EBV-transformed lymphocytes
ENSG00000165168.6	CYBB	X_37686974_A_G_b37	rs5964185	2.3e-06	0.38	Cells - EBV-transformed lymphocytes
ENSG00000165168.6	CYBB	X_37696553_T_C_b37	rs7055948	2.5e-06	0.15	Adipose - Subcutaneous
ENSG00000165168.6	CYBB	X_37563756_C_G_b37	rs7067148	2.7e-06	0.39	Cells - EBV-transformed lymphocytes
ENSG00000165168.6	CYBB	X_37687003_C_G_b37	rs5964186	2.8e-06	0.38	Cells - EBV-transformed lymphocytes
ENSG00000165168.6	CYBB	X_37653141_C_T_b37	rs6610669	3.2e-06	0.43	Cells - EBV-transformed lymphocytes
ENSG00000165168.6	CYBB	X_37516217_A_G_b37	rs6651743	3.3e-06	0.36	Cells - EBV-transformed lymphocytes
ENSG00000165168.6	CYBB	X_37696519_G_A_b37	rs7066115	3.3e-06	0.26	Esophagus - Gastroesophageal Junction
ENSG00000165168.6	CYBB	X_37685634_A_C_b37	rs17146321	3.3e-06	0.37	Cells - EBV-transformed lymphocytes
ENSG00000165168.6	CYBB	X_37518414_C_T_b37	rs984967	3.4e-06	0.36	Cells - EBV-transformed lymphocytes
ENSG00000165168.6	CYBB	X_37692644_T_C_b37	rs12390908	3.4e-06	0.37	Cells - EBV-transformed lymphocytes
ENSG00000165168.6	CYBB	X_37529562_T_C_b37	rs61322519	3.4e-06	0.4	Cells - EBV-transformed lymphocytes
ENSG00000165168.6	CYBB	X_37616747_G_A_b37	rs6651766	3.5e-06	0.39	Cells - EBV-transformed lymphocytes
ENSG00000165168.6	CYBB	X_37583628_T_G_b37	rs9887665	3.7e-06	0.37	Cells - EBV-transformed lymphocytes
ENSG00000165168.6	CYBB	X_37611289_T_C_b37	rs5963278	3.8e-06	0.37	Cells - EBV-transformed lymphocytes
ENSG00000165168.6	CYBB	X_37694357_C_T_b37	rs878337	3.9e-06	0.36	Cells - EBV-transformed lymphocytes
ENSG00000165168.6	CYBB	X_37696553_T_C_b37	rs7055948	4e-06	0.41	Cells - EBV-transformed lymphocytes
ENSG00000165168.6	CYBB	X_37699294_AGTT_A_b37	rs140268139	4.2e-06	0.37	Cells - EBV-transformed lymphocytes
ENSG00000165168.6	CYBB	X_37492775_C_T_b37	rs3117503	4.6e-06	0.4	Cells - EBV-transformed lymphocytes
ENSG00000165168.6	CYBB	X_37686932_C_G_b37	rs4494038	4.9e-06	0.36	Cells - EBV-transformed lymphocytes
ENSG00000165168.6	CYBB	X_37548850_A_G_b37	rs5963935	4.9e-06	0.39	Cells - EBV-transformed lymphocytes
ENSG00000165168.6	CYBB	X_37687877_A_C_b37	rs5963339	5e-06	0.36	Cells - EBV-transformed lymphocytes
ENSG00000165168.6	CYBB	X_37643878_GA_G_b37	rs369882070	5e-06	0.38	Cells - EBV-transformed lymphocytes
ENSG00000165168.6	CYBB	X_37680651_T_C_b37	rs4263903	5.1e-06	0.37	Cells - EBV-transformed lymphocytes
ENSG00000165168.6	CYBB	X_37510382_C_T_b37	rs7881860	5.2e-06	0.37	Cells - EBV-transformed lymphocytes
ENSG00000165168.6	CYBB	X_37692677_C_T_b37	rs12387511	5.3e-06	0.37	Cells - EBV-transformed lymphocytes
ENSG00000165168.6	CYBB	X_37691635_G_T_b37	rs11266335	5.3e-06	0.37	Cells - EBV-transformed lymphocytes
ENSG00000165168.6	CYBB	X_37645727_T_C_b37	rs5964099	5.6e-06	0.36	Cells - EBV-transformed lymphocytes
ENSG00000165168.6	CYBB	X_37542292_C_T_b37	rs5963228	5.6e-06	0.38	Cells - EBV-transformed lymphocytes
ENSG00000165168.6	CYBB	X_37636514_G_A_b37	rs6610650	5.6e-06	0.37	Cells - EBV-transformed lymphocytes
ENSG00000165168.6	CYBB	X_37590238_T_C_b37	rs5963262	5.6e-06	0.37	Cells - EBV-transformed lymphocytes
ENSG00000165168.6	CYBB	X_37669694_A_G_b37	rs5964149	5.8e-06	0.36	Cells - EBV-transformed lymphocytes
ENSG00000165168.6	CYBB	X_37692644_T_C_b37	rs12390908	5.9e-06	0.25	Esophagus - Gastroesophageal Junction
ENSG00000165168.6	CYBB	X_37857663_A_C_b37	rs146298604	6e-06	-0.37	Brain - Hippocampus
ENSG00000165168.6	CYBB	X_37675427_G_A_b37	rs5963329	6.1e-06	0.37	Cells - EBV-transformed lymphocytes
ENSG00000165168.6	CYBB	X_37537432_C_A_b37	rs5963919	6.3e-06	0.36	Cells - EBV-transformed lymphocytes
ENSG00000165168.6	CYBB	X_37504140_C_G_b37	rs1884688	6.3e-06	0.36	Cells - EBV-transformed lymphocytes
ENSG00000165168.6	CYBB	X_37603852_C_T_b37	rs72619424	6.4e-06	0.36	Cells - EBV-transformed lymphocytes
ENSG00000165168.6	CYBB	X_37566865_A_G_b37	rs190142630	6.4e-06	0.35	Cells - EBV-transformed lymphocytes
ENSG00000165168.6	CYBB	X_37521883_A_G_b37	rs7882747	6.7e-06	0.35	Cells - EBV-transformed lymphocytes
ENSG00000165168.6	CYBB	X_37610398_T_C_b37	rs5964057	7.2e-06	0.38	Cells - EBV-transformed lymphocytes
ENSG00000165168.6	CYBB	X_37530688_C_A_b37	rs5963220	7.5e-06	0.39	Cells - EBV-transformed lymphocytes
ENSG00000165168.6	CYBB	X_37596158_T_C_b37	rs57687841	7.5e-06	0.37	Cells - EBV-transformed lymphocytes
ENSG00000165168.6	CYBB	X_37684162_A_G_b37	rs7052712	8e-06	0.38	Cells - EBV-transformed lymphocytes
ENSG00000165168.6	CYBB	X_37629455_G_C_b37	rs140097659	8.1e-06	0.26	Esophagus - Gastroesophageal Junction
ENSG00000165168.6	CYBB	X_37662369_C_T_b37	rs17146255	8.4e-06	0.41	Cells - EBV-transformed lymphocytes
ENSG00000165168.6	CYBB	X_37691635_G_T_b37	rs11266335	8.4e-06	0.25	Esophagus - Gastroesophageal Junction
ENSG00000165168.6	CYBB	X_37686556_T_A_b37	rs4501722	8.6e-06	0.27	Esophagus - Gastroesophageal Junction
ENSG00000165168.6	CYBB	X_37523009_T_C_b37	rs7886836	8.7e-06	0.35	Cells - EBV-transformed lymphocytes
ENSG00000165168.6	CYBB	X_37687367_G_T_b37	rs5964187	8.7e-06	0.36	Cells - EBV-transformed lymphocytes
ENSG00000165168.6	CYBB	X_37619114_G_A_b37	rs7884397	8.8e-06	0.13	Adipose - Subcutaneous
ENSG00000165168.6	CYBB	X_37633447_C_T_b37	rs7054356	9.5e-06	0.13	Nerve - Tibial
ENSG00000165168.6	CYBB	X_37687003_C_G_b37	rs5964186	9.6e-06	0.13	Adipose - Subcutaneous
ENSG00000165168.6	CYBB	X_37594024_G_A_b37	rs5964030	1e-05	0.38	Cells - EBV-transformed lymphocytes
ENSG00000165168.6	CYBB	X_37684162_A_G_b37	rs7052712	1.1e-05	0.12	Adipose - Subcutaneous
ENSG00000165168.6	CYBB	X_37699294_AGTT_A_b37	rs140268139	1.2e-05	0.24	Esophagus - Gastroesophageal Junction
ENSG00000165168.6	CYBB	X_37555932_G_C_b37	rs2295447	1.2e-05	0.35	Cells - EBV-transformed lymphocytes
ENSG00000165168.6	CYBB	X_37528639_C_T_b37	rs72619419	1.2e-05	0.35	Cells - EBV-transformed lymphocytes
ENSG00000165168.6	CYBB	X_37529040_C_T_b37	rs6651753	1.2e-05	0.15	Lung
ENSG00000165168.6	CYBB	X_37687003_C_G_b37	rs5964186	1.2e-05	0.24	Esophagus - Gastroesophageal Junction
ENSG00000165168.6	CYBB	X_37654136_T_C_b37	rs12014060	1.2e-05	0.15	Lung
ENSG00000165168.6	CYBB	X_37496283_C_A_b37	rs3117506	1.2e-05	0.35	Cells - EBV-transformed lymphocytes
ENSG00000165168.6	CYBB	X_37688620_G_A_b37	rs7052496	1.3e-05	0.24	Esophagus - Gastroesophageal Junction
ENSG00000165168.6	CYBB	X_36761272_A_G_b37	rs149800385	1.3e-05	1.1	Cells - EBV-transformed lymphocytes
ENSG00000165168.6	CYBB	X_37676120_T_G_b37	rs5963331	1.4e-05	0.36	Cells - EBV-transformed lymphocytes
ENSG00000165168.6	CYBB	X_37596016_C_A_b37	rs17312170	1.5e-05	0.12	Adipose - Subcutaneous
ENSG00000165168.6	CYBB	X_37600151_C_A_b37	rs146220675	1.5e-05	0.66	Cells - EBV-transformed lymphocytes
ENSG00000165168.6	CYBB	X_37686974_A_G_b37	rs5964185	1.6e-05	0.23	Esophagus - Gastroesophageal Junction
ENSG00000165168.6	CYBB	X_37694515_A_G_b37	rs910876	1.6e-05	0.35	Cells - EBV-transformed lymphocytes
ENSG00000165168.6	CYBB	X_37667431_T_C_b37	rs7886998	1.6e-05	0.15	Lung
ENSG00000165168.6	CYBB	X_36800140_GA_G_b37	rs201595718	1.6e-05	2.1	Brain - Cortex
ENSG00000165168.6	CYBB	X_37643668_A_G_b37	rs6651773	1.6e-05	0.38	Cells - EBV-transformed lymphocytes
ENSG00000165168.6	CYBB	X_37684162_A_G_b37	rs7052712	1.6e-05	0.23	Esophagus - Gastroesophageal Junction
ENSG00000165168.6	CYBB	X_37531089_C_G_b37	rs5963222	1.6e-05	0.34	Cells - EBV-transformed lymphocytes
ENSG00000165168.6	CYBB	X_37529040_C_T_b37	rs6651753	1.7e-05	0.11	Nerve - Tibial
ENSG00000165168.6	CYBB	X_38054282_C_T_b37	rs2146004	1.7e-05	1.4	Brain - Nucleus accumbens (basal ganglia)
ENSG00000165168.6	CYBB	X_37683852_T_C_b37	rs5963337	1.7e-05	0.12	Adipose - Subcutaneous
ENSG00000165168.6	CYBB	X_37606277_G_C_b37	rs17312177	1.7e-05	0.16	Lung
ENSG00000165168.6	CYBB	X_37568491_A_G_b37	rs6610554	1.8e-05	0.37	Cells - EBV-transformed lymphocytes
ENSG00000165168.6	CYBB	X_37629871_A_C_b37	rs5964073	1.8e-05	0.29	Spleen
ENSG00000165168.6	CYBB	X_36790380_C_T_b37	rs149652951	1.8e-05	2	Brain - Cortex
ENSG00000165168.6	CYBB	X_36795131_C_G_b37	rs141077434	1.8e-05	2	Brain - Cortex
ENSG00000165168.6	CYBB	X_36795266_C_T_b37	rs150272410	1.8e-05	2	Brain - Cortex
ENSG00000165168.6	CYBB	X_36795962_G_C_b37	rs147146898	1.8e-05	2	Brain - Cortex
ENSG00000165168.6	CYBB	X_36796420_A_G_b37	rs144525706	1.8e-05	2	Brain - Cortex
ENSG00000165168.6	CYBB	X_36797219_C_T_b37	rs146034957	1.8e-05	2	Brain - Cortex
ENSG00000165168.6	CYBB	X_36801292_C_A_b37	rs151068131	1.8e-05	2	Brain - Cortex
ENSG00000165168.6	CYBB	X_36806554_A_T_b37	rs140862552	1.8e-05	2	Brain - Cortex
ENSG00000165168.6	CYBB	X_36822302_T_A_b37	rs114526650	1.8e-05	2	Brain - Cortex
ENSG00000165168.6	CYBB	X_37641526_C_A_b37	rs4422908	1.8e-05	0.29	Spleen
ENSG00000165168.6	CYBB	X_36832476_G_T_b37	rs114526785	1.8e-05	2	Brain - Cortex
ENSG00000165168.6	CYBB	X_37564436_C_T_b37	rs1989526	1.8e-05	0.36	Cells - EBV-transformed lymphocytes
ENSG00000165168.6	CYBB	X_37567168_C_A_b37	rs12012499	1.9e-05	0.16	Lung
ENSG00000165168.6	CYBB	X_37529040_C_T_b37	rs6651753	1.9e-05	0.33	Cells - EBV-transformed lymphocytes
ENSG00000165168.6	CYBB	X_37629871_A_C_b37	rs5964073	1.9e-05	0.34	Cells - EBV-transformed lymphocytes
ENSG00000165168.6	CYBB	X_37619291_T_A_b37	rs7891950	1.9e-05	0.16	Lung
ENSG00000165168.6	CYBB	X_37490517_G_A_b37	rs140193847	2e-05	0.34	Cells - EBV-transformed lymphocytes
ENSG00000165168.6	CYBB	X_37679803_G_A_b37	rs9330580	2e-05	0.15	Lung
ENSG00000165168.6	CYBB	X_37501486_C_T_b37	rs3117508	2e-05	0.33	Cells - EBV-transformed lymphocytes
ENSG00000165168.6	CYBB	X_37517626_A_G_b37	rs1998100	2e-05	0.33	Cells - EBV-transformed lymphocytes
ENSG00000165168.6	CYBB	X_37596932_G_A_b37	rs7880354	2.1e-05	0.39	Cells - EBV-transformed lymphocytes
ENSG00000165168.6	CYBB	X_37487695_G_T_b37	rs34603809	2.1e-05	0.36	Cells - EBV-transformed lymphocytes
ENSG00000165168.6	CYBB	X_37686932_C_G_b37	rs4494038	2.2e-05	0.24	Esophagus - Gastroesophageal Junction
ENSG00000165168.6	CYBB	X_37686974_A_G_b37	rs5964185	2.3e-05	0.12	Adipose - Subcutaneous
ENSG00000165168.6	CYBB	X_37612431_C_T_b37	rs72619425	2.3e-05	0.34	Cells - EBV-transformed lymphocytes
ENSG00000165168.6	CYBB	X_37685634_A_C_b37	rs17146321	2.3e-05	0.23	Esophagus - Gastroesophageal Junction
ENSG00000165168.6	CYBB	X_37496497_A_T_b37	rs3126418	2.3e-05	0.33	Cells - EBV-transformed lymphocytes
ENSG00000165168.6	CYBB	X_37544115_T_C_b37	rs72619420	2.4e-05	0.15	Lung
ENSG00000165168.6	CYBB	X_37683852_T_C_b37	rs5963337	2.4e-05	0.22	Esophagus - Gastroesophageal Junction
ENSG00000165168.6	CYBB	X_37685695_T_C_b37	rs7888889	2.6e-05	0.23	Esophagus - Gastroesophageal Junction
ENSG00000165168.6	CYBB	X_37685301_C_G_b37	rs4486340	2.6e-05	0.23	Esophagus - Gastroesophageal Junction
ENSG00000165168.6	CYBB	X_37685691_A_G_b37	rs7884670	2.6e-05	0.22	Esophagus - Gastroesophageal Junction
ENSG00000165168.6	CYBB	X_37567168_C_A_b37	rs12012499	2.6e-05	0.23	Esophagus - Gastroesophageal Junction
ENSG00000165168.6	CYBB	X_37679803_G_A_b37	rs9330580	2.7e-05	0.23	Esophagus - Gastroesophageal Junction
ENSG00000165168.6	CYBB	X_38047229_C_A_b37	rs6609400	2.8e-05	1.4	Brain - Nucleus accumbens (basal ganglia)
ENSG00000165168.6	CYBB	X_37654136_T_C_b37	rs12014060	2.9e-05	0.12	Adipose - Subcutaneous
ENSG00000165168.6	CYBB	X_37619291_T_A_b37	rs7891950	3e-05	0.12	Adipose - Subcutaneous
ENSG00000165168.6	CYBB	X_37629853_A_C_b37	rs5964072	3e-05	0.15	Lung
ENSG00000165168.6	CYBB	X_36645582_C_T_b37	rs4424415	3.1e-05	0.34	Brain - Cerebellum
ENSG00000165168.6	CYBB	X_37623375_C_CA_b37	rs370105882	3.2e-05	0.22	Esophagus - Gastroesophageal Junction
ENSG00000165168.6	CYBB	X_37664811_A_G_b37	rs35773320	3.3e-05	0.24	Esophagus - Gastroesophageal Junction
ENSG00000165168.6	CYBB	X_37654136_T_C_b37	rs12014060	3.4e-05	0.12	Nerve - Tibial
ENSG00000165168.6	CYBB	X_37673219_G_T_b37	rs5963327	3.4e-05	0.12	Adipose - Subcutaneous
ENSG00000165168.6	CYBB	X_37563811_G_A_b37	rs7053065	3.4e-05	0.12	Nerve - Tibial
ENSG00000165168.6	CYBB	X_37655735_TAAAC_T_b37	rs35574346	3.4e-05	0.22	Esophagus - Gastroesophageal Junction
ENSG00000165168.6	CYBB	X_37587804_A_T_b37	rs2230148	3.5e-05	0.12	Adipose - Subcutaneous
ENSG00000165168.6	CYBB	X_37694515_A_G_b37	rs910876	3.5e-05	0.11	Adipose - Subcutaneous
ENSG00000165168.6	CYBB	X_38251563_T_C_b37	rs4827097	3.9e-05	0.2	Skin - Not Sun Exposed (Suprapubic)
ENSG00000165168.6	CYBB	X_37611289_T_C_b37	rs5963278	4e-05	0.11	Nerve - Tibial
ENSG00000165168.6	CYBB	X_37692677_C_T_b37	rs12387511	4e-05	0.12	Adipose - Subcutaneous
ENSG00000165168.6	CYBB	X_37632252_G_A_b37	rs142096230	4e-05	0.13	Adipose - Subcutaneous
ENSG00000165168.6	CYBB	X_37578411_A_G_b37	rs5964000	4.1e-05	0.12	Nerve - Tibial
ENSG00000165168.6	CYBB	X_37629455_G_C_b37	rs140097659	4.2e-05	0.16	Lung
ENSG00000165168.6	CYBB	X_37642405_G_T_b37	rs4595265	4.4e-05	0.13	Nerve - Tibial
ENSG00000165168.6	CYBB	X_37655735_TAAAC_T_b37	rs35574346	4.5e-05	0.15	Lung
ENSG00000165168.6	CYBB	X_37537559_T_A_b37	rs5963920	4.7e-05	0.11	Nerve - Tibial
ENSG00000165168.6	CYBB	X_37563756_C_G_b37	rs7067148	5e-05	0.18	Skin - Not Sun Exposed (Suprapubic)
ENSG00000165168.6	CYBB	X_37563756_C_G_b37	rs7067148	5e-05	0.15	Lung
ENSG00000165168.6	CYBB	X_37680020_T_C_b37	rs72619430	5e-05	0.15	Lung
ENSG00000165168.6	CYBB	X_37568688_G_T_b37	rs6610555	5.1e-05	0.12	Nerve - Tibial
ENSG00000165168.6	CYBB	X_38034917_C_T_b37	rs138146123	5.1e-05	0.53	Lung
ENSG00000165168.6	CYBB	X_37587804_A_T_b37	rs2230148	5.2e-05	0.15	Lung
ENSG00000165168.6	CYBB	X_37686556_T_A_b37	rs4501722	5.2e-05	0.12	Adipose - Subcutaneous
ENSG00000165168.6	CYBB	X_37680020_T_C_b37	rs72619430	5.3e-05	0.12	Nerve - Tibial
ENSG00000165168.6	CYBB	X_37494585_T_C_b37	rs3117505	5.5e-05	0.16	Lung
ENSG00000165168.6	CYBB	X_37696519_G_A_b37	rs7066115	5.5e-05	0.12	Adipose - Subcutaneous
ENSG00000165168.6	CYBB	X_37531983_G_A_b37	rs67614978	5.6e-05	0.11	Nerve - Tibial
ENSG00000165168.6	CYBB	X_37531089_C_G_b37	rs5963222	5.9e-05	0.15	Lung
ENSG00000165168.6	CYBB	X_37685695_T_C_b37	rs7888889	5.9e-05	0.11	Adipose - Subcutaneous
ENSG00000165168.6	CYBB	X_37692677_C_T_b37	rs12387511	6.2e-05	0.11	Nerve - Tibial
ENSG00000165168.6	CYBB	X_37623375_C_CA_b37	rs370105882	6.3e-05	0.14	Lung
ENSG00000165168.6	CYBB	X_37685691_A_G_b37	rs7884670	6.3e-05	0.11	Adipose - Subcutaneous
ENSG00000165168.6	CYBB	X_37478824_A_AATTTGGTT_b37	rs5902155	6.3e-05	0.13	Lung
ENSG00000165168.6	CYBB	X_37680020_T_C_b37	rs72619430	6.4e-05	0.11	Adipose - Subcutaneous
ENSG00000165168.6	CYBB	X_37619114_G_A_b37	rs7884397	6.5e-05	0.12	Nerve - Tibial
ENSG00000165168.6	CYBB	X_37633165_G_A_b37	rs7057754	6.6e-05	0.12	Nerve - Tibial
ENSG00000165168.6	CYBB	X_37583628_T_G_b37	rs9887665	6.9e-05	0.11	Nerve - Tibial
ENSG00000165168.6	CYBB	X_37694357_C_T_b37	rs878337	7e-05	0.11	Adipose - Subcutaneous
ENSG00000165168.6	CYBB	X_37516217_A_G_b37	rs6651743	7.2e-05	0.1	Nerve - Tibial
ENSG00000165168.6	CYBB	X_37496370_A_G_b37	rs3126417	7.3e-05	0.11	Nerve - Tibial
ENSG00000165168.6	CYBB	X_36892643_T_A_b37	rs28698239	7.3e-05	-0.11	Adipose - Subcutaneous
ENSG00000165168.6	CYBB	X_36972643_T_G_b37	rs28790667	7.4e-05	-0.1	Adipose - Subcutaneous
ENSG00000165168.6	CYBB	X_37606277_G_C_b37	rs17312177	7.5e-05	0.11	Nerve - Tibial
ENSG00000165168.6	CYBB	X_37667431_T_C_b37	rs7886998	7.5e-05	0.11	Adipose - Subcutaneous
ENSG00000165168.6	CYBB	X_37687367_G_T_b37	rs5964187	7.6e-05	0.11	Adipose - Subcutaneous
ENSG00000165168.6	CYBB	X_37664811_A_G_b37	rs35773320	7.8e-05	0.12	Adipose - Subcutaneous
ENSG00000165168.6	CYBB	X_37687877_A_C_b37	rs5963339	8e-05	0.11	Nerve - Tibial
ENSG00000165168.6	CYBB	X_37482090_T_C_b37	rs3117499	8e-05	0.1	Nerve - Tibial
ENSG00000165168.6	CYBB	X_37633447_C_T_b37	rs7054356	8e-05	0.11	Adipose - Subcutaneous
ENSG00000165168.6	CYBB	X_37659562_T_A_b37	rs5963310	8.3e-05	0.11	Adipose - Subcutaneous
ENSG00000165168.6	CYBB	X_37644425_C_G_b37	rs6520785	8.5e-05	0.12	Adipose - Subcutaneous
ENSG00000165168.6	CYBB	X_37686809_C_T_b37	rs4440749	8.6e-05	0.12	Adipose - Subcutaneous
ENSG00000165168.6	CYBB	X_37675427_G_A_b37	rs5963329	9.8e-05	0.11	Nerve - Tibial
ENSG00000165168.6	CYBB	X_37659562_T_A_b37	rs5963310	0.00011	0.11	Nerve - Tibial
ENSG00000165168.6	CYBB	X_37643878_GA_G_b37	rs369882070	0.00011	0.11	Nerve - Tibial
ENSG00000165168.6	CYBB	X_37555932_G_C_b37	rs2295447	0.00011	0.11	Nerve - Tibial
ENSG00000165168.6	CYBB	X_37587804_A_T_b37	rs2230148	0.00012	0.12	Nerve - Tibial
ENSG00000165168.6	CYBB	X_37694357_C_T_b37	rs878337	0.00012	0.1	Nerve - Tibial
ENSG00000165168.6	CYBB	X_37664811_A_G_b37	rs35773320	0.00012	0.12	Nerve - Tibial

## Sheet: GTEx_GPX3
Gencode Id	Gene Symbol	Variant Id	SNP Id	P-Value	NES	Tissue
ENSG00000211445.7	GPX3	5_150385801_AT_A_b37	rs145915581	7.4e-54	1.1	Thyroid
ENSG00000211445.7	GPX3	5_150392646_G_A_b37	rs78553122	2e-47	1.1	Thyroid
ENSG00000211445.7	GPX3	5_150350270_G_T_b37	rs112766024	2.3e-44	1.1	Thyroid
ENSG00000211445.7	GPX3	5_150395351_G_A_b37	rs111576143	9.4e-43	1	Thyroid
ENSG00000211445.7	GPX3	5_150387559_C_T_b37	rs60522022	5.5e-41	0.93	Thyroid
ENSG00000211445.7	GPX3	5_150380664_A_T_b37	rs6859408	1.8e-24	0.59	Thyroid
ENSG00000211445.7	GPX3	5_150345936_C_T_b37	rs11738156	1.4e-21	0.59	Thyroid
ENSG00000211445.7	GPX3	5_150345407_T_C_b37	rs11741463	1.4e-21	0.63	Thyroid
ENSG00000211445.7	GPX3	5_150349563_A_T_b37	rs146459234	1.4e-21	0.63	Thyroid
ENSG00000211445.7	GPX3	5_150362119_G_C_b37	rs4958432	1.8e-21	0.63	Thyroid
ENSG00000211445.7	GPX3	5_150359205_A_ACAGT_b37	rs140870637	5.4e-21	0.61	Thyroid
ENSG00000211445.7	GPX3	5_150354954_G_A_b37	rs7722889	8.2e-21	0.61	Thyroid
ENSG00000211445.7	GPX3	5_150343188_A_G_b37	rs11742581	1.3e-20	0.62	Thyroid
ENSG00000211445.7	GPX3	5_150339382_G_A_b37	rs1600158	1.4e-20	0.69	Thyroid
ENSG00000211445.7	GPX3	5_150342133_T_C_b37	rs10476956	1.6e-20	0.57	Thyroid
ENSG00000211445.7	GPX3	5_150342032_T_C_b37	rs10476955	1.6e-20	0.57	Thyroid
ENSG00000211445.7	GPX3	5_150343260_G_C_b37	rs7729147	1.7e-20	0.57	Thyroid
ENSG00000211445.7	GPX3	5_150343458_T_C_b37	rs7711502	1.7e-20	0.57	Thyroid
ENSG00000211445.7	GPX3	5_150343608_C_T_b37	rs7729472	1.7e-20	0.57	Thyroid
ENSG00000211445.7	GPX3	5_150343670_T_TG_b37	rs141642048	1.7e-20	0.57	Thyroid
ENSG00000211445.7	GPX3	5_150343746_T_G_b37	rs7711986	1.7e-20	0.57	Thyroid
ENSG00000211445.7	GPX3	5_150343794_T_C_b37	rs7712141	1.7e-20	0.57	Thyroid
ENSG00000211445.7	GPX3	5_150344039_A_C_b37	rs112295833	1.7e-20	0.57	Thyroid
ENSG00000211445.7	GPX3	5_150344172_T_C_b37	rs150115024	1.7e-20	0.57	Thyroid
ENSG00000211445.7	GPX3	5_150345086_CA_C_b37	rs143256226	1.7e-20	0.57	Thyroid
ENSG00000211445.7	GPX3	5_150345276_C_T_b37	rs10050483	1.7e-20	0.57	Thyroid
ENSG00000211445.7	GPX3	5_150345565_A_G_b37	rs28829009	1.7e-20	0.57	Thyroid
ENSG00000211445.7	GPX3	5_150345839_G_A_b37	rs11738180	1.7e-20	0.57	Thyroid
ENSG00000211445.7	GPX3	5_150350285_C_T_b37	rs7700368	1.7e-20	0.57	Thyroid
ENSG00000211445.7	GPX3	5_150350866_G_A_b37	rs10050350	1.7e-20	0.57	Thyroid
ENSG00000211445.7	GPX3	5_150350990_G_A_b37	rs10050426	1.7e-20	0.57	Thyroid
ENSG00000211445.7	GPX3	5_150345677_T_C_b37	rs28870164	1.7e-20	0.57	Thyroid
ENSG00000211445.7	GPX3	5_150359405_A_G_b37	rs1478396	2.1e-20	0.6	Thyroid
ENSG00000211445.7	GPX3	5_150353871_C_G_b37	rs6877285	2.4e-20	0.6	Thyroid
ENSG00000211445.7	GPX3	5_150356336_G_A_b37	rs112298694	2.4e-20	0.6	Thyroid
ENSG00000211445.7	GPX3	5_150357846_G_T_b37	rs7710643	2.4e-20	0.6	Thyroid
ENSG00000211445.7	GPX3	5_150359987_C_A_b37	rs79375741	2.4e-20	0.6	Thyroid
ENSG00000211445.7	GPX3	5_150361720_A_G_b37	rs11749574	2.4e-20	0.6	Thyroid
ENSG00000211445.7	GPX3	5_150342001_T_C_b37	rs10476954	2.6e-20	0.57	Thyroid
ENSG00000211445.7	GPX3	5_150341061_T_A_b37	rs56929126	3.3e-20	0.58	Thyroid
ENSG00000211445.7	GPX3	5_150341651_T_A_b37	rs2344175	3.5e-20	0.57	Thyroid
ENSG00000211445.7	GPX3	5_150340682_G_T_b37	rs10476953	3.7e-20	0.58	Thyroid
ENSG00000211445.7	GPX3	5_150346590_G_A_b37	rs202059442	3.7e-20	0.58	Thyroid
ENSG00000211445.7	GPX3	5_150343138_G_A_b37	rs7728967	4.5e-20	0.57	Thyroid
ENSG00000211445.7	GPX3	5_150339824_C_T_b37	rs11955609	5.2e-20	0.58	Thyroid
ENSG00000211445.7	GPX3	5_150340989_T_G_b37	rs79855186	5.2e-20	0.58	Thyroid
ENSG00000211445.7	GPX3	5_150347219_T_C_b37	rs115926116	5.2e-20	0.58	Thyroid
ENSG00000211445.7	GPX3	5_150347381_T_G_b37	rs140871484	5.2e-20	0.58	Thyroid
ENSG00000211445.7	GPX3	5_150347568_G_A_b37	rs28757434	5.2e-20	0.58	Thyroid
ENSG00000211445.7	GPX3	5_150347712_G_A_b37	rs139665531	5.2e-20	0.58	Thyroid
ENSG00000211445.7	GPX3	5_150348542_G_A_b37	rs12110076	5.2e-20	0.58	Thyroid
ENSG00000211445.7	GPX3	5_150349476_C_T_b37	rs147045685	5.2e-20	0.58	Thyroid
ENSG00000211445.7	GPX3	5_150349523_G_A_b37	rs143782815	5.2e-20	0.58	Thyroid
ENSG00000211445.7	GPX3	5_150349537_G_A_b37	rs149515882	5.2e-20	0.58	Thyroid
ENSG00000211445.7	GPX3	5_150349552_C_T_b37	rs141839930	5.2e-20	0.58	Thyroid
ENSG00000211445.7	GPX3	5_150349576_A_G_b37	rs145806007	5.2e-20	0.58	Thyroid
ENSG00000211445.7	GPX3	5_150350013_G_A_b37	rs7734290	5.2e-20	0.58	Thyroid
ENSG00000211445.7	GPX3	5_150359053_A_T_b37	rs11746989	5.5e-20	0.57	Thyroid
ENSG00000211445.7	GPX3	5_150340618_C_T_b37	rs10476952	5.7e-20	0.58	Thyroid
ENSG00000211445.7	GPX3	5_150341232_G_A_b37	rs57992290	6.2e-20	0.58	Thyroid
ENSG00000211445.7	GPX3	5_150358402_T_A_b37	rs6896232	6.9e-20	0.57	Thyroid
ENSG00000211445.7	GPX3	5_150358459_C_A_b37	rs11950220	6.9e-20	0.57	Thyroid
ENSG00000211445.7	GPX3	5_150358351_A_T_b37	rs6579831	7.3e-20	0.57	Thyroid
ENSG00000211445.7	GPX3	5_150348987_A_AAAAC_b37	rs35626319	7.6e-20	0.57	Thyroid
ENSG00000211445.7	GPX3	5_150361111_T_G_b37	rs10042254	8.7e-20	0.57	Thyroid
ENSG00000211445.7	GPX3	5_150349757_G_A_b37	rs147734185	1.3e-19	0.57	Thyroid
ENSG00000211445.7	GPX3	5_150353021_T_C_b37	rs7732268	1.4e-19	0.57	Thyroid
ENSG00000211445.7	GPX3	5_150352823_T_C_b37	rs7731932	1.7e-19	0.55	Thyroid
ENSG00000211445.7	GPX3	5_150341628_C_T_b37	rs2344176	1.7e-19	0.56	Thyroid
ENSG00000211445.7	GPX3	5_150340132_T_C_b37	rs11167527	1.9e-19	0.57	Thyroid
ENSG00000211445.7	GPX3	5_150353890_C_A_b37	rs6877297	2e-19	0.56	Thyroid
ENSG00000211445.7	GPX3	5_150340609_G_A_b37	rs10476951	2.3e-19	0.57	Thyroid
ENSG00000211445.7	GPX3	5_150314756_C_A_b37	rs77556387	2.8e-19	0.83	Thyroid
ENSG00000211445.7	GPX3	5_150341653_T_G_b37	rs2344174	3.2e-19	0.57	Thyroid
ENSG00000211445.7	GPX3	5_150358092_G_A_b37	rs6579830	3.7e-19	0.55	Thyroid
ENSG00000211445.7	GPX3	5_150358794_C_T_b37	rs11950340	3.9e-19	0.56	Thyroid
ENSG00000211445.7	GPX3	5_150348264_G_T_b37	rs12110067	4.5e-19	0.57	Thyroid
ENSG00000211445.7	GPX3	5_150357982_A_C_b37	rs6579829	7.2e-19	0.56	Thyroid
ENSG00000211445.7	GPX3	5_150352642_C_CAAT_b37	rs769233489	9.5e-19	0.56	Thyroid
ENSG00000211445.7	GPX3	5_150357601_A_G_b37	rs7709870	1.8e-18	0.54	Thyroid
ENSG00000211445.7	GPX3	5_150341469_T_G_b37	rs4397118	5e-18	0.52	Thyroid
ENSG00000211445.7	GPX3	5_150345351_T_C_b37	rs10058425	5.4e-18	0.52	Thyroid
ENSG00000211445.7	GPX3	5_150364666_A_G_b37	rs11739333	6.3e-18	0.55	Thyroid
ENSG00000211445.7	GPX3	5_150344518_G_A_b37	rs11750221	6.7e-18	0.52	Thyroid
ENSG00000211445.7	GPX3	5_150345517_T_A_b37	rs11741495	6.7e-18	0.52	Thyroid
ENSG00000211445.7	GPX3	5_150347391_A_C_b37	rs112431475	6.7e-18	0.52	Thyroid
ENSG00000211445.7	GPX3	5_150351529_T_C_b37	rs3886104	6.7e-18	0.52	Thyroid
ENSG00000211445.7	GPX3	5_150342535_T_C_b37	rs10476957	7.3e-18	0.54	Thyroid
ENSG00000211445.7	GPX3	5_150365022_A_G_b37	rs11739412	1.4e-17	0.52	Thyroid
ENSG00000211445.7	GPX3	5_150369314_G_A_b37	rs57652693	1.8e-17	0.51	Thyroid
ENSG00000211445.7	GPX3	5_150314588_T_A_b37	rs75442664	1.9e-17	0.77	Thyroid
ENSG00000211445.7	GPX3	5_150320948_G_C_b37	rs75756583	1.9e-17	0.77	Thyroid
ENSG00000211445.7	GPX3	5_150343095_A_G_b37	rs7728527	2e-17	0.51	Thyroid
ENSG00000211445.7	GPX3	5_150346589_T_C_b37	rs150818972	2.2e-17	0.5	Thyroid
ENSG00000211445.7	GPX3	5_150346412_CA_C_b37		2.6e-17	0.57	Thyroid
ENSG00000211445.7	GPX3	5_150346415_A_C_b37	rs796361609	2.6e-17	0.57	Thyroid
ENSG00000211445.7	GPX3	5_150339955_A_G_b37	rs11949089	4.3e-17	0.54	Thyroid
ENSG00000211445.7	GPX3	5_150349469_A_G_b37	rs149194131	4.4e-17	0.51	Thyroid
ENSG00000211445.7	GPX3	5_150342380_A_G_b37	rs10476761	4.9e-17	0.53	Thyroid
ENSG00000211445.7	GPX3	5_150340111_A_T_b37	rs12652918	1.5e-16	0.5	Thyroid
ENSG00000211445.7	GPX3	5_150340285_A_T_b37	rs10476950	3.2e-16	0.5	Thyroid
ENSG00000211445.7	GPX3	5_150341971_G_A_b37	rs7719670	1.3e-15	0.49	Thyroid
ENSG00000211445.7	GPX3	5_150393115_A_AC_b37	rs111605509	3.3e-14	0.45	Thyroid
ENSG00000211445.7	GPX3	5_150213374_A_T_b37	rs12657855	8.4e-13	0.73	Thyroid
ENSG00000211445.7	GPX3	5_150339341_G_T_b37	rs1600157	9.2e-13	0.44	Thyroid
ENSG00000211445.7	GPX3	5_150349774_A_G_b37	rs35223100	2e-12	0.41	Thyroid
ENSG00000211445.7	GPX3	5_150339320_C_T_b37	rs1600156	2.9e-12	0.43	Thyroid
ENSG00000211445.7	GPX3	5_150202291_G_GAA_b37	rs146445558	3.1e-12	0.78	Thyroid
ENSG00000211445.7	GPX3	5_150205207_A_T_b37	rs72660281	3.5e-12	0.75	Thyroid
ENSG00000211445.7	GPX3	5_150193277_T_G_b37	rs74294173	3.6e-12	0.74	Thyroid
ENSG00000211445.7	GPX3	5_150262802_T_C_b37	rs77989834	3.7e-12	0.81	Thyroid
ENSG00000211445.7	GPX3	5_150219879_C_A_b37	rs72660295	4.4e-12	0.7	Thyroid
ENSG00000211445.7	GPX3	5_150208124_G_C_b37	rs78578812	5.8e-12	0.67	Thyroid
ENSG00000211445.7	GPX3	5_150208209_T_A_b37	rs80321117	6e-12	0.67	Thyroid
ENSG00000211445.7	GPX3	5_150346890_T_C_b37	rs10060945	8.1e-12	0.39	Thyroid
ENSG00000211445.7	GPX3	5_150189775_T_G_b37	rs77988978	8.8e-12	0.72	Thyroid
ENSG00000211445.7	GPX3	5_150210411_A_T_b37	rs72660286	9.2e-12	0.74	Thyroid
ENSG00000211445.7	GPX3	5_150225415_T_C_b37	rs75536889	1.4e-11	0.72	Thyroid
ENSG00000211445.7	GPX3	5_150204796_A_T_b37	rs72660280	1.7e-11	0.72	Thyroid
ENSG00000211445.7	GPX3	5_150281503_CCTT_C_b37	rs139499267	1.7e-11	0.72	Thyroid
ENSG00000211445.7	GPX3	5_150278982_TA_T_b37	rs139865848	1.8e-11	0.72	Thyroid
ENSG00000211445.7	GPX3	5_150199029_TA_T_b37	rs142610640	2.1e-11	0.73	Thyroid
ENSG00000211445.7	GPX3	5_150210889_C_T_b37	rs72660287	2.3e-11	0.71	Thyroid
ENSG00000211445.7	GPX3	5_150216316_C_A_b37	rs72660292	2.7e-11	0.71	Thyroid
ENSG00000211445.7	GPX3	5_150281841_A_G_b37	rs12656603	3e-11	0.71	Thyroid
ENSG00000211445.7	GPX3	5_150278179_C_T_b37	rs80187235	3.1e-11	0.71	Thyroid
ENSG00000211445.7	GPX3	5_150282234_T_C_b37	rs188044722	3.1e-11	0.71	Thyroid
ENSG00000211445.7	GPX3	5_150283716_G_T_b37	rs111894021	3.1e-11	0.71	Thyroid
ENSG00000211445.7	GPX3	5_150283720_A_ATT_b37	rs150231272	3.1e-11	0.71	Thyroid
ENSG00000211445.7	GPX3	5_150283804_C_CA_b37	rs149934741	3.1e-11	0.71	Thyroid
ENSG00000211445.7	GPX3	5_150284085_A_C_b37	rs76311153	3.1e-11	0.71	Thyroid
ENSG00000211445.7	GPX3	5_150284169_T_C_b37	rs79623152	3.1e-11	0.71	Thyroid
ENSG00000211445.7	GPX3	5_150284657_C_T_b37	rs79659435	3.1e-11	0.71	Thyroid
ENSG00000211445.7	GPX3	5_150285348_A_G_b37	rs80192078	3.1e-11	0.71	Thyroid
ENSG00000211445.7	GPX3	5_150286848_A_G_b37	rs75724231	3.1e-11	0.71	Thyroid
ENSG00000211445.7	GPX3	5_150282439_A_C_b37	rs78178596	3.1e-11	0.71	Thyroid
ENSG00000211445.7	GPX3	5_150282423_T_A_b37	rs78514223	3.1e-11	0.71	Thyroid
ENSG00000211445.7	GPX3	5_150274079_A_G_b37	rs10515643	3.2e-11	0.71	Thyroid
ENSG00000211445.7	GPX3	5_150282233_C_T_b37	rs183673646	3.3e-11	0.71	Thyroid
ENSG00000211445.7	GPX3	5_150276613_A_T_b37	rs77756126	3.5e-11	0.71	Thyroid
ENSG00000211445.7	GPX3	5_150276969_A_AAC_b37	rs201872058	3.5e-11	0.71	Thyroid
ENSG00000211445.7	GPX3	5_150277111_T_G_b37	rs17800777	3.5e-11	0.71	Thyroid
ENSG00000211445.7	GPX3	5_150277270_C_G_b37	rs78713819	3.5e-11	0.71	Thyroid
ENSG00000211445.7	GPX3	5_150277435_C_CAT_b37	rs773046056	3.5e-11	0.71	Thyroid
ENSG00000211445.7	GPX3	5_150247035_C_A_b37	rs72492463	3.7e-11	0.72	Thyroid
ENSG00000211445.7	GPX3	5_150199119_G_A_b37	rs12656888	3.7e-11	0.72	Thyroid
ENSG00000211445.7	GPX3	5_150278420_C_T_b37	rs77212559	3.8e-11	0.71	Thyroid
ENSG00000211445.7	GPX3	5_150263080_A_G_b37	rs75720180	3.8e-11	0.72	Thyroid
ENSG00000211445.7	GPX3	5_150275787_C_T_b37	rs17800771	3.9e-11	0.71	Thyroid
ENSG00000211445.7	GPX3	5_150262311_T_C_b37	rs75807404	4e-11	0.72	Thyroid
ENSG00000211445.7	GPX3	5_150199003_C_T_b37	rs115911571	4.1e-11	0.72	Thyroid
ENSG00000211445.7	GPX3	5_150199162_A_G_b37	rs12652653	4.1e-11	0.72	Thyroid
ENSG00000211445.7	GPX3	5_150199238_T_C_b37	rs12659091	4.1e-11	0.72	Thyroid
ENSG00000211445.7	GPX3	5_150199251_C_T_b37	rs12656873	4.1e-11	0.72	Thyroid
ENSG00000211445.7	GPX3	5_150199855_G_A_b37	rs78565227	4.1e-11	0.72	Thyroid
ENSG00000211445.7	GPX3	5_150200019_T_C_b37	rs114767277	4.1e-11	0.72	Thyroid
ENSG00000211445.7	GPX3	5_150200085_G_A_b37	rs116505068	4.1e-11	0.72	Thyroid
ENSG00000211445.7	GPX3	5_150200139_A_G_b37	rs116117469	4.1e-11	0.72	Thyroid
ENSG00000211445.7	GPX3	5_150200404_G_A_b37	rs75758577	4.1e-11	0.72	Thyroid
ENSG00000211445.7	GPX3	5_150200811_C_T_b37	rs79044688	4.1e-11	0.72	Thyroid
ENSG00000211445.7	GPX3	5_150200832_T_C_b37	rs77551664	4.1e-11	0.72	Thyroid
ENSG00000211445.7	GPX3	5_150200994_C_G_b37	rs115735895	4.1e-11	0.72	Thyroid
ENSG00000211445.7	GPX3	5_150201667_C_A_b37	rs77393234	4.1e-11	0.72	Thyroid
ENSG00000211445.7	GPX3	5_150201779_G_A_b37	rs74639589	4.1e-11	0.72	Thyroid
ENSG00000211445.7	GPX3	5_150201956_G_A_b37	rs74294174	4.1e-11	0.72	Thyroid
ENSG00000211445.7	GPX3	5_150224378_A_T_b37	rs79689395	4.1e-11	0.72	Thyroid
ENSG00000211445.7	GPX3	5_150225055_C_T_b37	rs79665755	4.1e-11	0.72	Thyroid
ENSG00000211445.7	GPX3	5_150226323_C_T_b37	rs12658239	4.1e-11	0.72	Thyroid
ENSG00000211445.7	GPX3	5_150226778_A_C_b37	rs77724219	4.1e-11	0.72	Thyroid
ENSG00000211445.7	GPX3	5_150227966_C_A_b37	rs72553867	4.1e-11	0.72	Thyroid
ENSG00000211445.7	GPX3	5_150230253_C_A_b37	rs74959468	4.1e-11	0.72	Thyroid
ENSG00000211445.7	GPX3	5_150230357_C_T_b37	rs75924195	4.1e-11	0.72	Thyroid
ENSG00000211445.7	GPX3	5_150233414_T_C_b37	rs79946494	4.1e-11	0.72	Thyroid
ENSG00000211445.7	GPX3	5_150238879_G_C_b37	rs12656307	4.1e-11	0.72	Thyroid
ENSG00000211445.7	GPX3	5_150242568_G_C_b37	rs78282250	4.1e-11	0.72	Thyroid
ENSG00000211445.7	GPX3	5_150243256_TG_T_b37	rs397882301	4.1e-11	0.72	Thyroid
ENSG00000211445.7	GPX3	5_150244152_C_A_b37	rs79155428	4.1e-11	0.72	Thyroid
ENSG00000211445.7	GPX3	5_150248743_T_C_b37	rs12652859	4.1e-11	0.72	Thyroid
ENSG00000211445.7	GPX3	5_150248905_T_C_b37	rs12652898	4.1e-11	0.72	Thyroid
ENSG00000211445.7	GPX3	5_150252060_G_A_b37	rs11739196	4.1e-11	0.72	Thyroid
ENSG00000211445.7	GPX3	5_150252310_G_A_b37	rs74294180	4.1e-11	0.72	Thyroid
ENSG00000211445.7	GPX3	5_150254146_C_T_b37	rs76768636	4.1e-11	0.72	Thyroid
ENSG00000211445.7	GPX3	5_150254224_G_A_b37	rs79536832	4.1e-11	0.72	Thyroid
ENSG00000211445.7	GPX3	5_150254365_T_G_b37	rs78939081	4.1e-11	0.72	Thyroid
ENSG00000211445.7	GPX3	5_150254862_G_T_b37	rs12654294	4.1e-11	0.72	Thyroid
ENSG00000211445.7	GPX3	5_150261219_A_G_b37	rs185219348	4.1e-11	0.72	Thyroid
ENSG00000211445.7	GPX3	5_150274374_T_C_b37	rs12653571	4.2e-11	0.71	Thyroid
ENSG00000211445.7	GPX3	5_150231585_AAT_A_b37	rs112594261	4.2e-11	0.72	Thyroid
ENSG00000211445.7	GPX3	5_150267322_C_T_b37	rs80263191	4.4e-11	0.72	Thyroid
ENSG00000211445.7	GPX3	5_150257722_G_A_b37	rs80213358	4.5e-11	0.72	Thyroid
ENSG00000211445.7	GPX3	5_150285783_G_A_b37	rs80164485	4.5e-11	0.72	Thyroid
ENSG00000211445.7	GPX3	5_150265281_C_G_b37	rs116015064	4.6e-11	0.72	Thyroid
ENSG00000211445.7	GPX3	5_150271292_A_G_b37	rs74405939	4.6e-11	0.72	Thyroid
ENSG00000211445.7	GPX3	5_150272060_A_T_b37	rs79716898	4.6e-11	0.72	Thyroid
ENSG00000211445.7	GPX3	5_150237411_C_T_b37	rs150141257	4.7e-11	0.72	Thyroid
ENSG00000211445.7	GPX3	5_150204842_G_GAGA_b37	rs143739354	5.1e-11	0.64	Thyroid
ENSG00000211445.7	GPX3	5_150272279_T_G_b37	rs78849458	5.3e-11	0.72	Thyroid
ENSG00000211445.7	GPX3	5_150202798_A_G_b37	rs138163497	5.9e-11	0.76	Thyroid
ENSG00000211445.7	GPX3	5_150280463_A_T_b37	rs76125741	6e-11	0.71	Thyroid
ENSG00000211445.7	GPX3	5_150261137_A_G_b37	rs78260325	6.4e-11	0.72	Thyroid
ENSG00000211445.7	GPX3	5_150210349_C_T_b37	rs72660285	7.1e-11	0.71	Thyroid
ENSG00000211445.7	GPX3	5_150282784_T_C_b37	rs2290989	7.2e-11	0.7	Thyroid
ENSG00000211445.7	GPX3	5_150284951_T_A_b37	rs1947773	1.7e-10	0.67	Thyroid
ENSG00000211445.7	GPX3	5_150351665_C_G_b37	rs4368715	2e-10	-0.33	Thyroid
ENSG00000211445.7	GPX3	5_150222097_G_A_b37	rs148401656	2.2e-10	0.62	Thyroid
ENSG00000211445.7	GPX3	5_150285886_A_T_b37	rs77088460	2.5e-10	0.66	Thyroid
ENSG00000211445.7	GPX3	5_150352277_C_T_b37	rs7711099	2.6e-10	-0.32	Thyroid
ENSG00000211445.7	GPX3	5_150281305_G_A_b37	rs77599091	3.2e-10	0.68	Thyroid
ENSG00000211445.7	GPX3	5_150209698_A_AT_b37	rs77362825	3.3e-10	0.58	Thyroid
ENSG00000211445.7	GPX3	5_150255348_C_T_b37	rs12654773	3.4e-10	0.67	Thyroid
ENSG00000211445.7	GPX3	5_150216534_C_G_b37	rs72660293	3.6e-10	0.61	Thyroid
ENSG00000211445.7	GPX3	5_150207861_A_G_b37	rs72660282	3.8e-10	0.6	Thyroid
ENSG00000211445.7	GPX3	5_150208297_A_G_b37	rs116117662	3.8e-10	0.6	Thyroid
ENSG00000211445.7	GPX3	5_150211038_C_T_b37	rs72660288	3.8e-10	0.6	Thyroid
ENSG00000211445.7	GPX3	5_150212972_C_T_b37	rs12653240	3.8e-10	0.6	Thyroid
ENSG00000211445.7	GPX3	5_150213382_G_C_b37	rs12653756	3.8e-10	0.6	Thyroid
ENSG00000211445.7	GPX3	5_150213655_C_T_b37	rs72660291	3.8e-10	0.6	Thyroid
ENSG00000211445.7	GPX3	5_150216731_T_C_b37	rs79327024	3.8e-10	0.6	Thyroid
ENSG00000211445.7	GPX3	5_150216737_C_G_b37	rs77545547	3.8e-10	0.6	Thyroid
ENSG00000211445.7	GPX3	5_150220708_G_A_b37	rs72660296	3.8e-10	0.6	Thyroid
ENSG00000211445.7	GPX3	5_150220764_C_A_b37	rs72660297	3.8e-10	0.6	Thyroid
ENSG00000211445.7	GPX3	5_150402334_C_T_b37	rs4958872	4e-10	0.26	Testis
ENSG00000211445.7	GPX3	5_150282058_C_T_b37	rs77988786	4.7e-10	0.68	Thyroid
ENSG00000211445.7	GPX3	5_150204726_T_A_b37	rs72660279	9.4e-10	0.62	Thyroid
ENSG00000211445.7	GPX3	5_150358957_G_A_b37	rs1038074	1e-09	-0.31	Thyroid
ENSG00000211445.7	GPX3	5_150410835_C_T_b37	rs10463311	1.2e-09	0.26	Testis
ENSG00000211445.7	GPX3	5_150212172_T_C_b37	rs72660290	1.8e-09	0.61	Thyroid
ENSG00000211445.7	GPX3	5_150217761_A_G_b37	rs72660294	1.9e-09	0.58	Thyroid
ENSG00000211445.7	GPX3	5_150207220_T_C_b37	rs114396193	2e-09	0.58	Thyroid
ENSG00000211445.7	GPX3	5_150211601_T_C_b37	rs72660289	2.3e-09	0.6	Thyroid
ENSG00000211445.7	GPX3	5_150405395_T_C_b37	rs4958874	2.5e-09	0.22	Testis
ENSG00000211445.7	GPX3	5_150360906_TTATC_T_b37	rs10610203	3.2e-09	-0.3	Thyroid
ENSG00000211445.7	GPX3	5_150182749_G_A_b37	rs76699393	4.5e-09	0.59	Thyroid
ENSG00000211445.7	GPX3	5_150361924_T_A_b37	rs10070386	4.8e-09	-0.3	Thyroid
ENSG00000211445.7	GPX3	5_150362948_C_A_b37	rs6898463	4.8e-09	-0.3	Thyroid
ENSG00000211445.7	GPX3	5_150181881_T_G_b37	rs76425495	6.9e-09	0.6	Thyroid
ENSG00000211445.7	GPX3	5_150183550_G_A_b37	rs75374664	6.9e-09	0.6	Thyroid
ENSG00000211445.7	GPX3	5_150402490_G_C_b37	rs3792796	8.9e-09	0.22	Testis
ENSG00000211445.7	GPX3	5_150401796_A_G_b37	rs3828599	9.2e-09	0.24	Testis
ENSG00000211445.7	GPX3	5_150404383_G_T_b37	rs8177435	9.6e-09	0.21	Testis
ENSG00000211445.7	GPX3	5_150402940_A_G_b37	rs8177426	1.1e-08	0.28	Testis
ENSG00000211445.7	GPX3	5_150360548_C_A_b37	rs12516727	1.1e-08	-0.29	Thyroid
ENSG00000211445.7	GPX3	5_150201120_T_G_b37	rs78946051	1.5e-08	0.52	Thyroid
ENSG00000211445.7	GPX3	5_150202126_A_G_b37	rs10060183	1.5e-08	0.52	Thyroid
ENSG00000211445.7	GPX3	5_150414709_C_A_b37	rs2233304	3.1e-08	1	Thyroid
ENSG00000211445.7	GPX3	5_150183789_G_GA_b37	rs143998070	3.2e-08	0.57	Thyroid
ENSG00000211445.7	GPX3	5_150408711_C_T_b37	rs3763010	3.3e-08	0.21	Testis
ENSG00000211445.7	GPX3	5_150221286_C_T_b37	rs116157220	3.6e-08	1	Thyroid
ENSG00000211445.7	GPX3	5_150352573_T_C_b37	rs7731554	4.1e-08	-0.28	Thyroid
ENSG00000211445.7	GPX3	5_150321008_T_C_b37	rs114972107	4.6e-08	1	Thyroid
ENSG00000211445.7	GPX3	5_150415477_C_G_b37	rs7727034	5e-08	0.23	Testis
ENSG00000211445.7	GPX3	5_150402570_A_G_b37	rs4958434	5.6e-08	0.27	Testis
ENSG00000211445.7	GPX3	5_150403011_A_G_b37	rs8177427	5.6e-08	0.27	Testis
ENSG00000211445.7	GPX3	5_150189278_G_A_b37	rs78359666	8.7e-08	0.52	Thyroid
ENSG00000211445.7	GPX3	5_150414388_A_G_b37	rs11747926	9.1e-08	0.28	Testis
ENSG00000211445.7	GPX3	5_150356521_T_C_b37	rs1478398	1e-07	-0.27	Thyroid
ENSG00000211445.7	GPX3	5_150404096_A_G_b37	rs4958873	1e-07	0.26	Testis
ENSG00000211445.7	GPX3	5_150407456_T_C_b37	rs8177447	1e-07	0.26	Testis
ENSG00000211445.7	GPX3	5_150371302_TG_T_b37	rs138017706	1.2e-07	0.94	Thyroid
ENSG00000211445.7	GPX3	5_150401891_A_C_b37	rs3792797	1.4e-07	0.26	Testis
ENSG00000211445.7	GPX3	5_150410894_T_C_b37	rs10463312	1.6e-07	0.2	Testis
ENSG00000211445.7	GPX3	5_150410135_G_A_b37	rs3924	1.7e-07	0.2	Testis
ENSG00000211445.7	GPX3	5_150403996_G_A_b37	rs8177431	1.9e-07	0.2	Testis
ENSG00000211445.7	GPX3	5_150266909_C_T_b37	rs76991767	2.1e-07	0.87	Thyroid
ENSG00000211445.7	GPX3	5_150303309_G_C_b37	rs77557378	2.1e-07	0.87	Thyroid
ENSG00000211445.7	GPX3	5_150383263_C_A_b37	rs2345000	2.1e-07	0.23	Heart - Atrial Appendage
ENSG00000211445.7	GPX3	5_150415651_C_T_b37	rs7727250	2.5e-07	0.27	Testis
ENSG00000211445.7	GPX3	5_150414960_A_C_b37	rs11748041	2.5e-07	0.27	Testis
ENSG00000211445.7	GPX3	5_150409348_T_C_b37	rs736775	2.8e-07	0.19	Testis
ENSG00000211445.7	GPX3	5_150415338_C_T_b37	rs2287720	2.9e-07	0.19	Testis
ENSG00000211445.7	GPX3	5_150436517_G_A_b37	rs2233289	3.1e-07	0.98	Thyroid
ENSG00000211445.7	GPX3	5_150381912_T_TCTGG_b37	rs10686305	4e-07	0.23	Heart - Atrial Appendage
ENSG00000211445.7	GPX3	5_150420339_G_C_b37	rs3805434	4.1e-07	0.27	Testis
ENSG00000211445.7	GPX3	5_150381889_T_C_b37	rs3902906	4.9e-07	0.54	Brain - Putamen (basal ganglia)
ENSG00000211445.7	GPX3	5_150383263_C_A_b37	rs2345000	5e-07	0.46	Brain - Anterior cingulate cortex (BA24)
ENSG00000211445.7	GPX3	5_150381912_T_TCTGG_b37	rs10686305	5.2e-07	0.47	Brain - Anterior cingulate cortex (BA24)
ENSG00000211445.7	GPX3	5_150200240_T_C_b37	rs113006696	5.8e-07	0.45	Thyroid
ENSG00000211445.7	GPX3	5_150381243_G_A_b37	rs17111637	7.6e-07	0.46	Brain - Anterior cingulate cortex (BA24)
ENSG00000211445.7	GPX3	5_150383263_C_A_b37	rs2345000	1.1e-06	0.12	Artery - Tibial
ENSG00000211445.7	GPX3	5_150381912_T_TCTGG_b37	rs10686305	1.2e-06	0.13	Artery - Tibial
ENSG00000211445.7	GPX3	5_150199337_C_G_b37	rs10069105	1.3e-06	0.4	Thyroid
ENSG00000211445.7	GPX3	5_150401253_G_A_b37	rs144615471	1.5e-06	0.89	Thyroid
ENSG00000211445.7	GPX3	5_150384959_A_G_b37	rs2054440	1.6e-06	0.12	Artery - Tibial
ENSG00000211445.7	GPX3	5_150355752_G_A_b37	rs141413541	1.7e-06	0.45	Brain - Anterior cingulate cortex (BA24)
ENSG00000211445.7	GPX3	5_150364559_C_T_b37	rs12519636	1.7e-06	0.45	Brain - Anterior cingulate cortex (BA24)
ENSG00000211445.7	GPX3	5_150365804_C_A_b37	rs62380655	2e-06	0.46	Brain - Anterior cingulate cortex (BA24)
ENSG00000211445.7	GPX3	5_150352224_A_G_b37	rs7710839	2.1e-06	0.45	Brain - Anterior cingulate cortex (BA24)
ENSG00000211445.7	GPX3	5_150356620_A_G_b37	rs1478397	2.1e-06	0.45	Brain - Anterior cingulate cortex (BA24)
ENSG00000211445.7	GPX3	5_150367063_A_C_b37	rs62380657	2.1e-06	0.45	Brain - Anterior cingulate cortex (BA24)
ENSG00000211445.7	GPX3	5_150353231_C_T_b37	rs2054439	2.2e-06	0.45	Brain - Anterior cingulate cortex (BA24)
ENSG00000211445.7	GPX3	5_150353231_C_T_b37	rs2054439	2.2e-06	0.49	Brain - Putamen (basal ganglia)
ENSG00000211445.7	GPX3	5_150384959_A_G_b37	rs2054440	2.6e-06	0.12	Nerve - Tibial
ENSG00000211445.7	GPX3	5_150356620_A_G_b37	rs1478397	2.6e-06	0.5	Brain - Putamen (basal ganglia)
ENSG00000211445.7	GPX3	5_150383263_C_A_b37	rs2345000	2.7e-06	0.45	Brain - Putamen (basal ganglia)
ENSG00000211445.7	GPX3	5_150383630_G_A_b37	rs12515502	2.7e-06	0.49	Brain - Putamen (basal ganglia)
ENSG00000211445.7	GPX3	5_150383904_G_C_b37	rs12515581	2.7e-06	0.49	Brain - Putamen (basal ganglia)
ENSG00000211445.7	GPX3	5_150318810_T_A_b37	rs6579818	3.2e-06	0.51	Brain - Anterior cingulate cortex (BA24)
ENSG00000211445.7	GPX3	5_150364559_C_T_b37	rs12519636	3.2e-06	0.46	Brain - Putamen (basal ganglia)
ENSG00000211445.7	GPX3	5_150383403_T_C_b37	rs12109402	3.3e-06	-0.41	Brain - Anterior cingulate cortex (BA24)
ENSG00000211445.7	GPX3	5_150381912_T_TCTGG_b37	rs10686305	3.5e-06	0.45	Brain - Putamen (basal ganglia)
ENSG00000211445.7	GPX3	5_150369960_G_C_b37	rs62382261	3.6e-06	0.6	Brain - Putamen (basal ganglia)
ENSG00000211445.7	GPX3	5_150367063_A_C_b37	rs62380657	3.8e-06	0.48	Brain - Putamen (basal ganglia)
ENSG00000211445.7	GPX3	5_150381243_G_A_b37	rs17111637	4.4e-06	0.12	Artery - Tibial
ENSG00000211445.7	GPX3	5_150383630_G_A_b37	rs12515502	4.5e-06	0.43	Brain - Anterior cingulate cortex (BA24)
ENSG00000211445.7	GPX3	5_150383904_G_C_b37	rs12515581	4.5e-06	0.43	Brain - Anterior cingulate cortex (BA24)
ENSG00000211445.7	GPX3	5_150382497_A_G_b37	rs10155601	4.8e-06	-0.4	Brain - Anterior cingulate cortex (BA24)
ENSG00000211445.7	GPX3	5_150355752_G_A_b37	rs141413541	4.8e-06	0.48	Brain - Putamen (basal ganglia)
ENSG00000211445.7	GPX3	5_150352224_A_G_b37	rs7710839	4.9e-06	0.47	Brain - Putamen (basal ganglia)
ENSG00000211445.7	GPX3	5_150402570_A_G_b37	rs4958434	5e-06	0.27	Heart - Left Ventricle
ENSG00000211445.7	GPX3	5_150403011_A_G_b37	rs8177427	5e-06	0.27	Heart - Left Ventricle
ENSG00000211445.7	GPX3	5_150383263_C_A_b37	rs2345000	5.1e-06	0.21	Heart - Left Ventricle
ENSG00000211445.7	GPX3	5_150381243_G_A_b37	rs17111637	5.5e-06	0.21	Heart - Atrial Appendage
ENSG00000211445.7	GPX3	5_150299621_A_G_b37	rs6868828	6e-06	0.19	Heart - Atrial Appendage
ENSG00000211445.7	GPX3	5_150336873_A_G_b37	rs4958429	6.1e-06	0.18	Heart - Atrial Appendage
ENSG00000211445.7	GPX3	5_150353775_C_A_b37	rs977696	6.2e-06	0.43	Brain - Anterior cingulate cortex (BA24)
ENSG00000211445.7	GPX3	5_150383630_G_A_b37	rs12515502	6.3e-06	0.2	Heart - Atrial Appendage
ENSG00000211445.7	GPX3	5_150381889_T_C_b37	rs3902906	6.4e-06	0.43	Brain - Anterior cingulate cortex (BA24)
ENSG00000211445.7	GPX3	5_150383904_G_C_b37	rs12515581	6.4e-06	0.12	Artery - Tibial
ENSG00000211445.7	GPX3	5_150413406_A_C_b37	rs2233305	6.9e-06	0.22	Testis
ENSG00000211445.7	GPX3	5_150353775_C_A_b37	rs977696	7e-06	0.47	Brain - Putamen (basal ganglia)
ENSG00000211445.7	GPX3	5_150381243_G_A_b37	rs17111637	7.2e-06	0.44	Brain - Putamen (basal ganglia)
ENSG00000211445.7	GPX3	5_150389354_G_A_b37	rs707146	7.8e-06	0.19	Thyroid
ENSG00000211445.7	GPX3	5_150357350_C_T_b37	rs1382323	8e-06	0.42	Brain - Anterior cingulate cortex (BA24)
ENSG00000211445.7	GPX3	5_150381912_T_TCTGG_b37	rs10686305	8.2e-06	0.21	Heart - Left Ventricle
ENSG00000211445.7	GPX3	5_150356386_C_A_b37	rs1478399	8.4e-06	0.42	Brain - Anterior cingulate cortex (BA24)
ENSG00000211445.7	GPX3	5_150358443_G_A_b37	rs1351131	8.4e-06	0.42	Brain - Anterior cingulate cortex (BA24)
ENSG00000211445.7	GPX3	5_150361730_C_T_b37	rs35104024	8.4e-06	0.42	Brain - Anterior cingulate cortex (BA24)
ENSG00000211445.7	GPX3	5_150362041_C_T_b37	rs12517537	8.4e-06	0.42	Brain - Anterior cingulate cortex (BA24)
ENSG00000211445.7	GPX3	5_150383630_G_A_b37	rs12515502	8.8e-06	0.12	Artery - Tibial
ENSG00000211445.7	GPX3	5_150336728_C_T_b37	rs4591738	9.3e-06	0.19	Heart - Atrial Appendage
ENSG00000211445.7	GPX3	5_150483257_G_C_b37	rs41290563	9.6e-06	0.81	Thyroid
ENSG00000211445.7	GPX3	5_150384959_A_G_b37	rs2054440	9.9e-06	0.2	Heart - Atrial Appendage
ENSG00000211445.7	GPX3	5_150301417_A_G_b37	rs72807816	1e-05	0.49	Brain - Anterior cingulate cortex (BA24)
ENSG00000211445.7	GPX3	5_150308040_T_G_b37	rs6866153	1.1e-05	0.19	Heart - Atrial Appendage
ENSG00000211445.7	GPX3	5_150312084_C_T_b37	rs4958850	1.1e-05	0.19	Heart - Atrial Appendage
ENSG00000211445.7	GPX3	5_150314749_G_A_b37	rs6884351	1.1e-05	0.19	Heart - Atrial Appendage
ENSG00000211445.7	GPX3	5_150383904_G_C_b37	rs12515581	1.1e-05	0.2	Heart - Atrial Appendage
ENSG00000211445.7	GPX3	5_150390517_A_G_b37	rs707149	1.1e-05	0.19	Thyroid
ENSG00000211445.7	GPX3	5_150375953_G_T_b37	rs4958867	1.2e-05	0.2	Thyroid
ENSG00000211445.7	GPX3	5_150327519_C_A_b37	rs4958851	1.2e-05	0.45	Brain - Anterior cingulate cortex (BA24)
ENSG00000211445.7	GPX3	5_150323530_GTGGGAGAAGGTCGTGA_G_b37	rs59236887	1.3e-05	0.18	Heart - Atrial Appendage
ENSG00000211445.7	GPX3	5_150393091_G_A_b37	rs10434722	1.3e-05	-0.19	Thyroid
ENSG00000211445.7	GPX3	5_150292290_T_C_b37	rs6579808	1.4e-05	0.19	Heart - Atrial Appendage
ENSG00000211445.7	GPX3	5_150297888_G_C_b37	rs1382319	1.4e-05	0.18	Heart - Atrial Appendage
ENSG00000211445.7	GPX3	5_150364559_C_T_b37	rs12519636	1.5e-05	0.11	Artery - Tibial
ENSG00000211445.7	GPX3	5_150293407_A_G_b37	rs6864531	1.5e-05	0.19	Heart - Atrial Appendage
ENSG00000211445.7	GPX3	5_150316261_A_G_b37	rs7733619	1.5e-05	0.18	Heart - Atrial Appendage
ENSG00000211445.7	GPX3	5_150300965_G_A_b37	rs1600154	1.6e-05	0.19	Heart - Atrial Appendage
ENSG00000211445.7	GPX3	5_150369960_G_C_b37	rs62382261	1.7e-05	0.25	Heart - Left Ventricle
ENSG00000211445.7	GPX3	5_150338202_C_G_b37	rs2100935	1.7e-05	0.18	Heart - Atrial Appendage
ENSG00000211445.7	GPX3	5_150393136_C_CA_b37	rs397782760	1.7e-05	-0.19	Thyroid
ENSG00000211445.7	GPX3	5_150381912_T_TCTGG_b37	rs10686305	1.8e-05	0.11	Nerve - Tibial
ENSG00000211445.7	GPX3	5_150300601_C_G_b37	rs1600153	1.8e-05	0.18	Heart - Atrial Appendage
ENSG00000211445.7	GPX3	5_150315691_C_T_b37	rs1478391	1.9e-05	0.18	Heart - Atrial Appendage
ENSG00000211445.7	GPX3	5_150299210_G_A_b37	rs1478389	1.9e-05	0.19	Heart - Atrial Appendage
ENSG00000211445.7	GPX3	5_150376052_T_C_b37	rs4958868	2e-05	0.19	Thyroid
ENSG00000211445.7	GPX3	5_150366739_G_A_b37	rs62380656	2e-05	0.19	Thyroid
ENSG00000211445.7	GPX3	5_150291403_G_A_b37	rs964072	2.1e-05	0.18	Heart - Atrial Appendage
ENSG00000211445.7	GPX3	5_150313552_A_G_b37	rs11747403	2.1e-05	0.18	Heart - Atrial Appendage
ENSG00000211445.7	GPX3	5_150305182_C_T_b37	rs1478390	2.1e-05	0.18	Heart - Atrial Appendage
ENSG00000211445.7	GPX3	5_150311857_CT_C_b37	rs10719367	2.1e-05	0.18	Heart - Atrial Appendage
ENSG00000211445.7	GPX3	5_150293594_G_C_b37	rs6865257	2.1e-05	0.18	Heart - Atrial Appendage
ENSG00000211445.7	GPX3	5_150294052_T_C_b37	rs1600152	2.1e-05	0.18	Heart - Atrial Appendage
ENSG00000211445.7	GPX3	5_150309694_C_T_b37	rs67719255	2.1e-05	0.18	Heart - Atrial Appendage
ENSG00000211445.7	GPX3	5_150309803_C_T_b37	rs17714562	2.1e-05	0.18	Heart - Atrial Appendage
ENSG00000211445.7	GPX3	5_150310852_C_T_b37	rs6861480	2.1e-05	0.18	Heart - Atrial Appendage
ENSG00000211445.7	GPX3	5_150311080_T_A_b37	rs10875561	2.1e-05	0.18	Heart - Atrial Appendage
ENSG00000211445.7	GPX3	5_150311368_T_G_b37	rs17658199	2.1e-05	0.18	Heart - Atrial Appendage
ENSG00000211445.7	GPX3	5_150311678_A_G_b37	rs11167525	2.1e-05	0.18	Heart - Atrial Appendage
ENSG00000211445.7	GPX3	5_150313994_A_C_b37	rs10875562	2.1e-05	0.18	Heart - Atrial Appendage
ENSG00000211445.7	GPX3	5_150314256_A_T_b37	rs12521445	2.1e-05	0.18	Heart - Atrial Appendage
ENSG00000211445.7	GPX3	5_150314471_C_T_b37	rs6883738	2.1e-05	0.18	Heart - Atrial Appendage
ENSG00000211445.7	GPX3	5_150314850_A_G_b37	rs6884120	2.1e-05	0.18	Heart - Atrial Appendage
ENSG00000211445.7	GPX3	5_150382497_A_G_b37	rs10155601	2.2e-05	-0.1	Artery - Tibial
ENSG00000211445.7	GPX3	5_150311421_T_A_b37	rs17714586	2.2e-05	0.18	Heart - Atrial Appendage
ENSG00000211445.7	GPX3	5_150311773_T_C_b37	rs7727919	2.3e-05	0.18	Heart - Atrial Appendage
ENSG00000211445.7	GPX3	5_150381243_G_A_b37	rs17111637	2.3e-05	0.2	Heart - Left Ventricle
ENSG00000211445.7	GPX3	5_150381889_T_C_b37	rs3902906	2.3e-05	0.2	Heart - Atrial Appendage
ENSG00000211445.7	GPX3	5_150315141_A_G_b37	rs6888604	2.3e-05	0.18	Heart - Atrial Appendage
ENSG00000211445.7	GPX3	5_150321577_A_C_b37	rs6893670	2.3e-05	0.18	Heart - Atrial Appendage
ENSG00000211445.7	GPX3	5_150328217_C_T_b37	rs6579820	2.3e-05	0.18	Heart - Atrial Appendage
ENSG00000211445.7	GPX3	5_150428195_C_T_b37	rs4292439	2.4e-05	0.2	Testis
ENSG00000211445.7	GPX3	5_150369960_G_C_b37	rs62382261	2.4e-05	0.23	Heart - Atrial Appendage
ENSG00000211445.7	GPX3	5_150278983_A_T_b37	rs183172854	2.4e-05	0.82	Thyroid
ENSG00000211445.7	GPX3	5_150512374_T_C_b37	rs115112983	2.6e-05	0.82	Thyroid
ENSG00000211445.7	GPX3	5_150293078_T_C_b37	rs11167522	2.6e-05	0.18	Heart - Atrial Appendage
ENSG00000211445.7	GPX3	5_150337499_G_A_b37	rs1600155	2.7e-05	0.17	Heart - Atrial Appendage
ENSG00000211445.7	GPX3	5_150329970_C_T_b37	rs6869441	2.8e-05	0.18	Heart - Atrial Appendage
ENSG00000211445.7	GPX3	5_150296008_G_A_b37	rs6579810	2.8e-05	0.18	Heart - Atrial Appendage
ENSG00000211445.7	GPX3	5_150298115_G_A_b37	rs1478388	2.8e-05	0.18	Heart - Atrial Appendage
ENSG00000211445.7	GPX3	5_150292325_T_G_b37	rs6579809	2.8e-05	0.18	Heart - Atrial Appendage
ENSG00000211445.7	GPX3	5_150365804_C_A_b37	rs62380655	2.8e-05	0.19	Heart - Atrial Appendage
ENSG00000211445.7	GPX3	5_150322973_T_TCCC_b37	rs3214905	2.9e-05	0.18	Heart - Atrial Appendage
ENSG00000211445.7	GPX3	5_150387493_G_A_b37	rs707144	3e-05	0.18	Thyroid
ENSG00000211445.7	GPX3	5_150382497_A_G_b37	rs10155601	3.1e-05	-0.11	Nerve - Tibial
ENSG00000211445.7	GPX3	5_150367063_A_C_b37	rs62380657	3.2e-05	0.11	Artery - Tibial
ENSG00000211445.7	GPX3	5_150356386_C_A_b37	rs1478399	3.5e-05	0.11	Artery - Tibial
ENSG00000211445.7	GPX3	5_150358443_G_A_b37	rs1351131	3.5e-05	0.11	Artery - Tibial
ENSG00000211445.7	GPX3	5_150362041_C_T_b37	rs12517537	3.5e-05	0.11	Artery - Tibial
ENSG00000211445.7	GPX3	5_150381889_T_C_b37	rs3902906	3.6e-05	0.11	Artery - Tibial
ENSG00000211445.7	GPX3	5_150816080_A_G_b37	rs72798307	3.7e-05	0.28	Thyroid
ENSG00000211445.7	GPX3	5_150356620_A_G_b37	rs1478397	3.9e-05	0.11	Artery - Tibial
ENSG00000211445.7	GPX3	5_150383263_C_A_b37	rs2345000	4.2e-05	0.1	Nerve - Tibial
ENSG00000211445.7	GPX3	5_150355752_G_A_b37	rs141413541	4.2e-05	0.1	Artery - Tibial
ENSG00000211445.7	GPX3	5_150381243_G_A_b37	rs17111637	4.7e-05	0.1	Nerve - Tibial
ENSG00000211445.7	GPX3	5_150370102_A_G_b37	rs13163581	5e-05	0.18	Thyroid
ENSG00000211445.7	GPX3	5_150811022_T_G_b37	rs7445141	5.3e-05	0.25	Thyroid

## Sheet: GTEx_IL6
Gencode Id	Gene Symbol	Variant Id	SNP Id	P-Value	NES	Tissue
ENSG00000136244.7	IL6	7_21775063_G_A_b37	rs72657357	8.1e-07	-0.62	Colon - Transverse
ENSG00000136244.7	IL6	7_21771465_G_A_b37	rs7800783	1.1e-06	-0.63	Colon - Transverse

## Sheet: GTEx_IL10
Gencode Id	Gene Symbol	Variant Id	SNP Id	P-Value	NES	Tissue
ENSG00000136634.5	IL10	1_206955651_T_C_b37	rs6686931	2.7e-10	0.31	Whole Blood
ENSG00000136634.5	IL10	1_206944233_A_G_b37	rs1554286	2.2e-09	0.3	Whole Blood
ENSG00000136634.5	IL10	1_206944645_T_C_b37	rs1518111	2.5e-09	0.29	Whole Blood
ENSG00000136634.5	IL10	1_206944861_A_C_b37	rs1518110	2.5e-09	0.29	Whole Blood
ENSG00000136634.5	IL10	1_206945311_A_C_b37	rs3024490	4.5e-09	0.28	Whole Blood
ENSG00000136634.5	IL10	1_206946407_T_G_b37	rs1800872	4.5e-09	0.28	Whole Blood
ENSG00000136634.5	IL10	1_206946634_A_G_b37	rs1800871	4.5e-09	0.28	Whole Blood
ENSG00000136634.5	IL10	1_206941529_T_C_b37	rs3024498	1.7e-06	0.21	Whole Blood
ENSG00000136634.5	IL10	1_206938439_A_G_b37	rs61815632	2.3e-06	0.21	Whole Blood
ENSG00000136634.5	IL10	1_206937245_G_T_b37	rs6673928	2.5e-06	0.21	Whole Blood
ENSG00000136634.5	IL10	1_206944112_T_A_b37	rs3024492	2.9e-06	0.21	Whole Blood
ENSG00000136634.5	IL10	1_206915809_A_G_b37	rs10494878	3.8e-06	0.22	Whole Blood
ENSG00000136634.5	IL10	1_206948639_C_T_b37	rs6703630	6.7e-06	0.19	Whole Blood
ENSG00000136634.5	IL10	1_206851035_T_C_b37	rs11119297	6.9e-06	-0.29	Whole Blood
ENSG00000136634.5	IL10	1_206844970_G_A_b37	rs12038489	7.3e-06	-0.27	Whole Blood
ENSG00000136634.5	IL10	1_206925375_G_A_b37	rs7539748	7.6e-06	0.22	Whole Blood
ENSG00000136634.5	IL10	1_206850453_T_G_b37	rs116183781	7.7e-06	-0.29	Whole Blood
ENSG00000136634.5	IL10	1_206865555_TG_T_b37	rs367801648	1.4e-05	-0.28	Whole Blood
ENSG00000136634.5	IL10	1_206871784_G_C_b37	rs10863784	2e-05	-0.28	Whole Blood
ENSG00000136634.5	IL10	1_206868245_G_A_b37	rs4129024	2.3e-05	0.21	Whole Blood
ENSG00000136634.5	IL10	1_206872631_G_A_b37	rs35125368	2.3e-05	0.21	Whole Blood
ENSG00000136634.5	IL10	1_206864408_AC_A_b37	rs371363175	2.4e-05	-0.27	Whole Blood
ENSG00000136634.5	IL10	1_206912501_A_G_b37	rs4147011	2.5e-05	-0.28	Whole Blood
ENSG00000136634.5	IL10	1_206955701_T_A_b37	rs6687015	2.5e-05	0.18	Whole Blood
ENSG00000136634.5	IL10	1_206909450_T_A_b37	rs55715735	2.7e-05	0.21	Whole Blood
ENSG00000136634.5	IL10	1_206941864_A_G_b37	rs3024496	3e-05	0.17	Whole Blood
ENSG00000136634.5	IL10	1_207256964_C_T_b37	rs73077015	4e-05	0.91	Esophagus - Muscularis
ENSG00000136634.5	IL10	1_206945046_C_A_b37	rs3024491	4.6e-05	0.17	Whole Blood
ENSG00000136634.5	IL10	1_206945381_G_A_b37	rs2222202	4.6e-05	0.17	Whole Blood
ENSG00000136634.5	IL10	1_206940831_A_G_b37	rs3024500	4.7e-05	0.16	Whole Blood
ENSG00000136634.5	IL10	1_206944645_T_C_b37	rs1518111	4.9e-05	0.26	Nerve - Tibial
ENSG00000136634.5	IL10	1_206940310_C_T_b37	rs3024502	5e-05	0.17	Whole Blood
ENSG00000136634.5	IL10	1_206946897_T_C_b37	rs1800896	6e-05	0.16	Whole Blood
ENSG00000136634.5	IL10	1_206945311_A_C_b37	rs3024490	6.7e-05	0.25	Nerve - Tibial
ENSG00000136634.5	IL10	1_207266082_G_C_b37	rs56166793	6.8e-05	0.87	Esophagus - Muscularis
ENSG00000136634.5	IL10	1_206946407_T_G_b37	rs1800872	7.3e-05	0.25	Nerve - Tibial
ENSG00000136634.5	IL10	1_206946634_A_G_b37	rs1800871	7.3e-05	0.25	Nerve - Tibial
ENSG00000136634.5	IL10	1_206944861_A_C_b37	rs1518110	8.5e-05	0.25	Nerve - Tibial

## Sheet: GTEx_NCF1
Gencode Id	Gene Symbol	Variant Id	SNP Id	P-Value	NES	Tissue
ENSG00000158517.9	NCF1	7_74105219_ATGT_A_b37	rs34765995	9.9e-07	0.18	Esophagus - Mucosa
ENSG00000158517.9	NCF1	7_74140925_G_C_b37	rs810366	1.6e-06	0.26	Adipose - Subcutaneous
ENSG00000158517.9	NCF1	7_74305086_T_C_b37	rs2529279	2e-06	0.11	Whole Blood
ENSG00000158517.9	NCF1	7_74098949_G_A_b37	rs2527366	2.2e-06	0.18	Esophagus - Mucosa
ENSG00000158517.9	NCF1	7_74099677_A_C_b37	rs2718272	2.2e-06	0.18	Esophagus - Mucosa
ENSG00000158517.9	NCF1	7_74138121_A_C_b37	rs2267812	2.5e-06	0.26	Adipose - Subcutaneous
ENSG00000158517.9	NCF1	7_73868241_T_G_b37	rs181306727	2.5e-06	-0.68	Artery - Tibial
ENSG00000158517.9	NCF1	7_74236723_C_T_b37	rs80239815	2.5e-06	0.18	Esophagus - Mucosa
ENSG00000158517.9	NCF1	7_74306708_G_GA_b37	rs376727434	3.4e-06	0.12	Whole Blood
ENSG00000158517.9	NCF1	7_74196244_C_T_b37	rs800980	4e-06	0.14	Whole Blood
ENSG00000158517.9	NCF1	7_74058992_A_G_b37	rs6967942	5.5e-06	-0.17	Esophagus - Mucosa
ENSG00000158517.9	NCF1	7_74061512_G_A_b37	rs13247682	5.7e-06	0.12	Whole Blood
ENSG00000158517.9	NCF1	7_74104706_T_C_b37	rs2527380	6.2e-06	0.18	Esophagus - Mucosa
ENSG00000158517.9	NCF1	7_74099138_C_T_b37	rs2527367	8.6e-06	0.17	Esophagus - Mucosa
ENSG00000158517.9	NCF1	7_74065589_A_G_b37	rs6460087	8.7e-06	-0.17	Esophagus - Mucosa
ENSG00000158517.9	NCF1	7_73764782_C_T_b37	rs28858376	8.9e-06	-0.7	Stomach
ENSG00000158517.9	NCF1	7_73765036_A_T_b37	rs57085904	8.9e-06	-0.7	Stomach
ENSG00000158517.9	NCF1	7_73766812_A_C_b37	rs56199878	8.9e-06	-0.7	Stomach
ENSG00000158517.9	NCF1	7_74095092_ATGT_A_b37	rs368190082	8.9e-06	0.17	Esophagus - Mucosa
ENSG00000158517.9	NCF1	7_74068747_C_G_b37	rs112506907	9.4e-06	-0.17	Esophagus - Mucosa
ENSG00000158517.9	NCF1	7_74138121_A_C_b37	rs2267812	9.4e-06	0.12	Whole Blood
ENSG00000158517.9	NCF1	7_74140925_G_C_b37	rs810366	9.5e-06	0.12	Whole Blood
ENSG00000158517.9	NCF1	7_74122720_A_T_b37	rs12672029	9.9e-06	0.17	Esophagus - Mucosa
ENSG00000158517.9	NCF1	7_74076493_A_G_b37	rs13238568	1e-05	-0.17	Esophagus - Mucosa
ENSG00000158517.9	NCF1	7_74081407_T_G_b37	rs28584911	1.2e-05	-0.17	Esophagus - Mucosa
ENSG00000158517.9	NCF1	7_74212048_C_T_b37	rs707395	1.2e-05	0.24	Adipose - Subcutaneous
ENSG00000158517.9	NCF1	7_73239219_G_A_b37	rs139685925	1.3e-05	0.52	Colon - Transverse
ENSG00000158517.9	NCF1	7_74060455_C_A_b37	rs13243640	1.4e-05	-0.17	Esophagus - Mucosa
ENSG00000158517.9	NCF1	7_74298377_T_C_b37	rs1062273	1.5e-05	0.28	Breast - Mammary Tissue
ENSG00000158517.9	NCF1	7_74095687_T_A_b37	rs2527374	1.5e-05	0.17	Esophagus - Mucosa
ENSG00000158517.9	NCF1	7_74080862_CT_C_b37	rs34717383	1.6e-05	0.11	Whole Blood
ENSG00000158517.9	NCF1	7_74304341_G_A_b37	rs192530690	1.7e-05	0.11	Whole Blood
ENSG00000158517.9	NCF1	7_74134911_T_C_b37	rs35005436	1.7e-05	0.26	Adipose - Subcutaneous
ENSG00000158517.9	NCF1	7_74134911_T_C_b37	rs35005436	1.7e-05	0.13	Whole Blood
ENSG00000158517.9	NCF1	7_74069645_A_G_b37	rs13238996	2.3e-05	0.11	Whole Blood
ENSG00000158517.9	NCF1	7_74127495_TA_T_b37	rs5884957	2.3e-05	0.17	Esophagus - Mucosa
ENSG00000158517.9	NCF1	7_74196244_C_T_b37	rs800980	2.4e-05	0.29	Skin - Sun Exposed (Lower leg)
ENSG00000158517.9	NCF1	7_74117893_G_T_b37	rs6973978	2.7e-05	0.11	Whole Blood
ENSG00000158517.9	NCF1	7_74132014_A_G_b37	rs17515241	2.7e-05	0.11	Whole Blood
ENSG00000158517.9	NCF1	7_74132305_T_A_b37	rs34324835	2.7e-05	0.11	Whole Blood
ENSG00000158517.9	NCF1	7_75142556_A_G_b37	rs192639244	2.9e-05	0.38	Breast - Mammary Tissue
ENSG00000158517.9	NCF1	7_74088893_G_A_b37	rs35473599	3e-05	0.11	Whole Blood
ENSG00000158517.9	NCF1	7_74098056_A_G_b37	rs7794284	3e-05	0.11	Whole Blood
ENSG00000158517.9	NCF1	7_74089819_G_C_b37	rs36044436	3.2e-05	0.11	Whole Blood
ENSG00000158517.9	NCF1	7_74196244_C_T_b37	rs800980	3.4e-05	0.26	Esophagus - Muscularis
ENSG00000158517.9	NCF1	7_74140051_C_T_b37	rs810364	3.4e-05	0.17	Esophagus - Mucosa
ENSG00000158517.9	NCF1	7_74196244_C_T_b37	rs800980	3.5e-05	0.25	Adipose - Subcutaneous
ENSG00000158517.9	NCF1	7_75142573_G_T_b37	rs141180141	3.5e-05	0.38	Breast - Mammary Tissue
ENSG00000158517.9	NCF1	7_74131650_T_TC_b37	rs139797652	3.6e-05	0.11	Whole Blood
ENSG00000158517.9	NCF1	7_74066227_T_C_b37	rs35735900	3.9e-05	0.1	Whole Blood
ENSG00000158517.9	NCF1	7_74240559_T_C_b37	rs71270258	4e-05	0.19	Esophagus - Mucosa
ENSG00000158517.9	NCF1	7_74094721_T_G_b37	rs13227433	4.1e-05	0.11	Whole Blood
ENSG00000158517.9	NCF1	7_74063883_G_C_b37	rs57542467	4.6e-05	0.1	Whole Blood
ENSG00000158517.9	NCF1	7_74077883_T_C_b37	rs7801385	4.6e-05	0.1	Whole Blood
ENSG00000158517.9	NCF1	7_73961925_C_T_b37	rs56278054	4.6e-05	0.97	Skin - Sun Exposed (Lower leg)
ENSG00000158517.9	NCF1	7_74132014_A_G_b37	rs17515241	4.7e-05	0.21	Adipose - Subcutaneous
ENSG00000158517.9	NCF1	7_74083230_C_A_b37	rs4717905	4.9e-05	0.21	Adipose - Subcutaneous
ENSG00000158517.9	NCF1	7_74105196_C_T_b37	rs35203738	5.1e-05	0.1	Whole Blood
ENSG00000158517.9	NCF1	7_74236750_T_C_b37	rs801012	5.1e-05	0.23	Adipose - Subcutaneous
ENSG00000158517.9	NCF1	7_74068167_T_C_b37	rs4717903	5.4e-05	0.1	Whole Blood
ENSG00000158517.9	NCF1	7_74117893_G_T_b37	rs6973978	5.9e-05	0.21	Adipose - Subcutaneous
ENSG00000158517.9	NCF1	7_74132305_T_A_b37	rs34324835	5.9e-05	0.21	Adipose - Subcutaneous
ENSG00000158517.9	NCF1	7_74061197_G_C_b37	rs34630792	6e-05	0.1	Whole Blood
ENSG00000158517.9	NCF1	7_74073590_A_G_b37	rs73137144	6e-05	0.11	Whole Blood
ENSG00000158517.9	NCF1	7_74026563_G_A_b37	rs10254397	6.1e-05	-0.16	Esophagus - Mucosa
ENSG00000158517.9	NCF1	7_74114847_T_C_b37	rs2301907	6.2e-05	0.21	Adipose - Subcutaneous
ENSG00000158517.9	NCF1	7_74122857_A_G_b37	rs7795282	6.2e-05	0.21	Adipose - Subcutaneous
ENSG00000158517.9	NCF1	7_74058292_G_T_b37	rs35633336	6.4e-05	0.1	Whole Blood
ENSG00000158517.9	NCF1	7_74097363_T_TA_b37	rs376695011	6.6e-05	0.1	Whole Blood
ENSG00000158517.9	NCF1	7_74050694_T_C_b37	rs34762099	6.7e-05	0.1	Whole Blood
ENSG00000158517.9	NCF1	7_74082387_A_G_b37	rs77393417	6.7e-05	0.11	Whole Blood
ENSG00000158517.9	NCF1	7_74114847_T_C_b37	rs2301907	6.7e-05	0.1	Whole Blood
ENSG00000158517.9	NCF1	7_74122854_A_G_b37	rs7795281	6.7e-05	0.1	Whole Blood
ENSG00000158517.9	NCF1	7_74122857_A_G_b37	rs7795282	6.7e-05	0.1	Whole Blood
ENSG00000158517.9	NCF1	7_74212036_C_G_b37	rs707394	7e-05	0.25	Adipose - Subcutaneous
ENSG00000158517.9	NCF1	7_74051807_G_A_b37	rs78942036	7e-05	0.1	Whole Blood
ENSG00000158517.9	NCF1	7_74083022_C_A_b37	rs4717904	7.1e-05	0.1	Whole Blood
ENSG00000158517.9	NCF1	7_74113141_G_A_b37	rs3846966	7.5e-05	0.2	Adipose - Subcutaneous
ENSG00000158517.9	NCF1	7_74122854_A_G_b37	rs7795281	7.7e-05	0.2	Adipose - Subcutaneous
ENSG00000158517.9	NCF1	7_74134911_T_C_b37	rs35005436	8.1e-05	0.24	Esophagus - Muscularis
ENSG00000158517.9	NCF1	7_74304341_G_A_b37	rs192530690	8.3e-05	0.21	Adipose - Subcutaneous
ENSG00000158517.9	NCF1	7_74131650_T_TC_b37	rs139797652	8.4e-05	0.21	Adipose - Subcutaneous
ENSG00000158517.9	NCF1	7_74098056_A_G_b37	rs7794284	8.8e-05	0.2	Adipose - Subcutaneous
ENSG00000158517.9	NCF1	7_74083022_C_A_b37	rs4717904	9.2e-05	0.21	Adipose - Subcutaneous
ENSG00000158517.9	NCF1	7_74212048_C_T_b37	rs707395	0.00011	0.24	Skin - Sun Exposed (Lower leg)

## Sheet: GTEx_NCF2
Gencode Id	Gene Symbol	Variant Id	SNP Id	P-Value	NES	Tissue
ENSG00000116701.10	NCF2	1_183563161_C_G_b37	rs11579965	2e-41	-0.91	Skin - Sun Exposed (Lower leg)
ENSG00000116701.10	NCF2	1_183559841_G_A_b37	rs12091406	2.1e-41	-0.9	Skin - Sun Exposed (Lower leg)
ENSG00000116701.10	NCF2	1_183560035_G_A_b37	rs13306580	2.1e-41	-0.9	Skin - Sun Exposed (Lower leg)
ENSG00000116701.10	NCF2	1_183560196_C_T_b37	rs4987079	2.3e-41	-0.9	Skin - Sun Exposed (Lower leg)
ENSG00000116701.10	NCF2	1_183561560_C_A_b37	rs12066019	1.4e-40	-0.9	Skin - Sun Exposed (Lower leg)
ENSG00000116701.10	NCF2	1_183561697_A_G_b37	rs12096702	1.4e-40	-0.9	Skin - Sun Exposed (Lower leg)
ENSG00000116701.10	NCF2	1_183561725_G_T_b37	rs12086699	1.4e-40	-0.9	Skin - Sun Exposed (Lower leg)
ENSG00000116701.10	NCF2	1_183558996_G_A_b37	rs34110768	1.5e-40	-0.91	Skin - Sun Exposed (Lower leg)
ENSG00000116701.10	NCF2	1_183554714_C_T_b37	rs34423782	3.2e-39	-0.88	Skin - Sun Exposed (Lower leg)
ENSG00000116701.10	NCF2	1_183582249_A_G_b37	rs2767316	1.3e-34	-0.57	Artery - Tibial
ENSG00000116701.10	NCF2	1_183579379_G_A_b37	rs2761556	1.7e-34	-0.57	Artery - Tibial
ENSG00000116701.10	NCF2	1_183579585_T_A_b37	rs2767311	1.7e-34	-0.57	Artery - Tibial
ENSG00000116701.10	NCF2	1_183579911_A_G_b37	rs2767312	1.7e-34	-0.57	Artery - Tibial
ENSG00000116701.10	NCF2	1_183579973_C_T_b37	rs2761558	1.7e-34	-0.57	Artery - Tibial
ENSG00000116701.10	NCF2	1_183580279_C_T_b37	rs2761559	1.7e-34	-0.57	Artery - Tibial
ENSG00000116701.10	NCF2	1_183580653_G_C_b37	rs2761561	1.7e-34	-0.57	Artery - Tibial
ENSG00000116701.10	NCF2	1_183581038_G_T_b37	rs2476571	1.7e-34	-0.57	Artery - Tibial
ENSG00000116701.10	NCF2	1_183581755_G_A_b37	rs2761566	1.7e-34	-0.57	Artery - Tibial
ENSG00000116701.10	NCF2	1_183582172_T_C_b37	rs2767315	1.7e-34	-0.57	Artery - Tibial
ENSG00000116701.10	NCF2	1_183582765_A_G_b37	rs61811180	1.7e-34	-0.57	Artery - Tibial
ENSG00000116701.10	NCF2	1_183583021_T_C_b37	rs111610865	1.7e-34	-0.57	Artery - Tibial
ENSG00000116701.10	NCF2	1_183583992_C_T_b37	rs75940660	1.7e-34	-0.57	Artery - Tibial
ENSG00000116701.10	NCF2	1_183583993_A_G_b37	rs75435975	1.7e-34	-0.57	Artery - Tibial
ENSG00000116701.10	NCF2	1_183584159_G_A_b37	rs12062320	1.7e-34	-0.57	Artery - Tibial
ENSG00000116701.10	NCF2	1_183582830_G_A_b37	rs61811181	1.8e-34	-0.57	Artery - Tibial
ENSG00000116701.10	NCF2	1_183583950_C_T_b37	rs78070601	1.8e-34	-0.57	Artery - Tibial
ENSG00000116701.10	NCF2	1_183584067_TTC_T_b37	rs113152065	2e-34	-0.57	Artery - Tibial
ENSG00000116701.10	NCF2	1_183583937_A_C_b37	rs75705092	2.1e-34	-0.57	Artery - Tibial
ENSG00000116701.10	NCF2	1_183579123_C_G_b37	rs2761555	2.3e-34	-0.57	Artery - Tibial
ENSG00000116701.10	NCF2	1_183584150_T_A_b37	rs12067848	2.5e-34	-0.6	Artery - Tibial
ENSG00000116701.10	NCF2	1_183596136_A_G_b37	rs11755	2.5e-34	-0.58	Artery - Tibial
ENSG00000116701.10	NCF2	1_183586313_C_T_b37	rs200835529	4.2e-34	-0.58	Artery - Tibial
ENSG00000116701.10	NCF2	1_183584354_C_T_b37	rs12082958	7.6e-34	-0.57	Artery - Tibial
ENSG00000116701.10	NCF2	1_183579726_TG_T_b37	rs796140731	9.9e-34	-0.57	Artery - Tibial
ENSG00000116701.10	NCF2	1_183584285_G_A_b37	rs12062368	9.9e-34	-0.57	Artery - Tibial
ENSG00000116701.10	NCF2	1_183581960_A_G_b37	rs2761568	1.1e-33	-0.57	Artery - Tibial
ENSG00000116701.10	NCF2	1_183580427_C_T_b37	rs2767313	1.1e-33	-0.57	Artery - Tibial
ENSG00000116701.10	NCF2	1_183583107_G_T_b37	rs62031859	1.1e-33	-0.57	Artery - Tibial
ENSG00000116701.10	NCF2	1_183604905_A_G_b37	rs2767305	1.1e-33	-0.57	Artery - Tibial
ENSG00000116701.10	NCF2	1_183602795_A_G_b37	rs2254972	1.2e-33	-0.57	Artery - Tibial
ENSG00000116701.10	NCF2	1_183583101_A_G_b37	rs74755153	1.4e-33	-0.57	Artery - Tibial
ENSG00000116701.10	NCF2	1_183586973_G_C_b37	rs2761571	2.3e-33	-0.57	Artery - Tibial
ENSG00000116701.10	NCF2	1_183581402_C_T_b37	rs2761565	2.7e-33	-0.57	Artery - Tibial
ENSG00000116701.10	NCF2	1_183580827_G_A_b37	rs2761563	3.1e-33	-0.57	Artery - Tibial
ENSG00000116701.10	NCF2	1_183579729_G_T_b37	rs34840421	4.5e-33	-0.57	Artery - Tibial
ENSG00000116701.10	NCF2	1_183576552_T_C_b37	rs2767307	5.4e-33	-0.56	Artery - Tibial
ENSG00000116701.10	NCF2	1_183586265_C_T_b37	rs201591467	8.3e-33	-0.57	Artery - Tibial
ENSG00000116701.10	NCF2	1_183580370_G_A_b37	rs2761560	1.6e-32	-0.56	Artery - Tibial
ENSG00000116701.10	NCF2	1_183563840_C_T_b37	rs11580439	1.9e-32	-0.75	Skin - Sun Exposed (Lower leg)
ENSG00000116701.10	NCF2	1_183580826_T_C_b37	rs2761562	2.3e-32	-0.57	Artery - Tibial
ENSG00000116701.10	NCF2	1_183583150_C_G_b37	rs75815911	2.5e-32	-0.57	Artery - Tibial
ENSG00000116701.10	NCF2	1_183609654_A_G_b37	rs1174687	8e-32	-0.56	Artery - Tibial
ENSG00000116701.10	NCF2	1_183587440_C_T_b37	rs2478761	8.5e-32	-0.55	Artery - Tibial
ENSG00000116701.10	NCF2	1_183653691_A_G_b37	rs7520442	2.3e-31	0.54	Artery - Tibial
ENSG00000116701.10	NCF2	1_183650380_C_G_b37	rs140224751	2.5e-31	0.54	Artery - Tibial
ENSG00000116701.10	NCF2	1_183576236_C_G_b37	rs2767306	3.2e-31	-0.54	Artery - Tibial
ENSG00000116701.10	NCF2	1_183568298_A_G_b37	rs59591433	3.2e-31	-0.54	Artery - Tibial
ENSG00000116701.10	NCF2	1_183647995_G_A_b37	rs12724273	4.5e-31	0.54	Artery - Tibial
ENSG00000116701.10	NCF2	1_183644173_G_A_b37	rs12120000	4.6e-31	0.54	Artery - Tibial
ENSG00000116701.10	NCF2	1_183583164_C_T_b37	rs377482073	4.9e-31	-0.58	Artery - Tibial
ENSG00000116701.10	NCF2	1_183628095_C_T_b37	rs7541678	5e-31	0.54	Artery - Tibial
ENSG00000116701.10	NCF2	1_183563833_A_G_b37	rs10797892	1.3e-30	-0.55	Artery - Tibial
ENSG00000116701.10	NCF2	1_183563808_A_G_b37	rs10797891	1.6e-30	-0.54	Artery - Tibial
ENSG00000116701.10	NCF2	1_183563709_C_T_b37	rs10797890	1.6e-30	-0.54	Artery - Tibial
ENSG00000116701.10	NCF2	1_183586240_A_T_b37	rs114063887	3.4e-30	-0.56	Artery - Tibial
ENSG00000116701.10	NCF2	1_183564287_C_T_b37	rs10911368	8.7e-30	-0.54	Artery - Tibial
ENSG00000116701.10	NCF2	1_183564301_G_C_b37	rs3903838	1.4e-29	-0.54	Artery - Tibial
ENSG00000116701.10	NCF2	1_183573228_G_A_b37	rs2767314	1.4e-29	-0.53	Artery - Tibial
ENSG00000116701.10	NCF2	1_183671556_C_G_b37	rs2148627	1.7e-29	0.52	Artery - Tibial
ENSG00000116701.10	NCF2	1_183694281_C_T_b37	rs6660352	2.9e-29	0.52	Artery - Tibial
ENSG00000116701.10	NCF2	1_183704104_C_T_b37	rs7530552	3.5e-29	0.51	Artery - Tibial
ENSG00000116701.10	NCF2	1_183691923_C_G_b37	rs6699197	4e-29	0.52	Artery - Tibial
ENSG00000116701.10	NCF2	1_183715525_G_A_b37	rs2182594	4.3e-29	0.52	Artery - Tibial
ENSG00000116701.10	NCF2	1_183692426_A_G_b37	rs10911421	4.9e-29	0.51	Artery - Tibial
ENSG00000116701.10	NCF2	1_183692814_C_A_b37	rs7554816	4.9e-29	0.51	Artery - Tibial
ENSG00000116701.10	NCF2	1_183693921_C_T_b37	rs1926827	4.9e-29	0.51	Artery - Tibial
ENSG00000116701.10	NCF2	1_183694185_G_A_b37	rs6660412	4.9e-29	0.51	Artery - Tibial
ENSG00000116701.10	NCF2	1_183704400_T_G_b37	rs12734523	4.9e-29	0.52	Artery - Tibial
ENSG00000116701.10	NCF2	1_183675169_T_C_b37	rs12739778	4.9e-29	0.52	Artery - Tibial
ENSG00000116701.10	NCF2	1_183676719_G_T_b37	rs12132735	4.9e-29	0.52	Artery - Tibial
ENSG00000116701.10	NCF2	1_183692766_A_G_b37	rs7532280	5e-29	0.51	Artery - Tibial
ENSG00000116701.10	NCF2	1_183697046_G_T_b37	rs7553224	5e-29	0.51	Artery - Tibial
ENSG00000116701.10	NCF2	1_183676791_C_G_b37	rs12117797	5.1e-29	0.52	Artery - Tibial
ENSG00000116701.10	NCF2	1_183670898_C_T_b37	rs6424906	5.1e-29	0.52	Artery - Tibial
ENSG00000116701.10	NCF2	1_183669380_T_C_b37	rs12133984	5.1e-29	0.52	Artery - Tibial
ENSG00000116701.10	NCF2	1_183694787_T_A_b37	rs2148620	5.2e-29	0.51	Artery - Tibial
ENSG00000116701.10	NCF2	1_183670800_G_A_b37	rs6663585	5.2e-29	0.52	Artery - Tibial
ENSG00000116701.10	NCF2	1_183670811_T_C_b37	rs6424905	5.2e-29	0.52	Artery - Tibial
ENSG00000116701.10	NCF2	1_183667858_G_A_b37	rs6701811	5.2e-29	0.52	Artery - Tibial
ENSG00000116701.10	NCF2	1_183668806_G_A_b37	rs12753772	5.2e-29	0.52	Artery - Tibial
ENSG00000116701.10	NCF2	1_183670012_A_G_b37	rs12138300	5.2e-29	0.52	Artery - Tibial
ENSG00000116701.10	NCF2	1_183670529_A_G_b37	rs1926838	5.2e-29	0.52	Artery - Tibial
ENSG00000116701.10	NCF2	1_183670577_A_G_b37	rs1926839	5.2e-29	0.52	Artery - Tibial
ENSG00000116701.10	NCF2	1_183672052_T_C_b37	rs4517316	5.2e-29	0.52	Artery - Tibial
ENSG00000116701.10	NCF2	1_183672085_A_G_b37	rs4607832	5.2e-29	0.52	Artery - Tibial
ENSG00000116701.10	NCF2	1_183673327_T_C_b37	rs12729088	5.2e-29	0.52	Artery - Tibial
ENSG00000116701.10	NCF2	1_183674297_T_C_b37	rs6689503	5.2e-29	0.52	Artery - Tibial
ENSG00000116701.10	NCF2	1_183677332_T_C_b37	rs60771493	5.2e-29	0.52	Artery - Tibial
ENSG00000116701.10	NCF2	1_183677613_A_G_b37	rs2182596	5.2e-29	0.52	Artery - Tibial
ENSG00000116701.10	NCF2	1_183677873_C_G_b37	rs2182597	5.2e-29	0.52	Artery - Tibial
ENSG00000116701.10	NCF2	1_183669774_G_A_b37	rs12130947	5.3e-29	0.52	Artery - Tibial
ENSG00000116701.10	NCF2	1_183671399_C_G_b37	rs2148626	5.4e-29	0.52	Artery - Tibial
ENSG00000116701.10	NCF2	1_183671385_G_A_b37	rs2148625	5.5e-29	0.52	Artery - Tibial
ENSG00000116701.10	NCF2	1_183563161_C_G_b37	rs11579965	6.3e-29	-0.86	Skin - Not Sun Exposed (Suprapubic)
ENSG00000116701.10	NCF2	1_183696874_A_G_b37	rs12562713	7.2e-29	0.52	Artery - Tibial
ENSG00000116701.10	NCF2	1_183714508_T_A_b37	rs34484934	8.2e-29	0.51	Artery - Tibial
ENSG00000116701.10	NCF2	1_183714509_GT_G_b37	rs869277201	8.2e-29	0.51	Artery - Tibial
ENSG00000116701.10	NCF2	1_183667369_G_A_b37	rs7553722	8.8e-29	0.51	Artery - Tibial
ENSG00000116701.10	NCF2	1_183689266_T_C_b37	rs4609393	9.3e-29	0.52	Artery - Tibial
ENSG00000116701.10	NCF2	1_183698514_A_G_b37	rs1073848	9.6e-29	0.51	Artery - Tibial
ENSG00000116701.10	NCF2	1_183688777_C_A_b37	rs2004077	9.6e-29	0.51	Artery - Tibial
ENSG00000116701.10	NCF2	1_183705589_T_C_b37	rs12120527	9.8e-29	0.51	Artery - Tibial
ENSG00000116701.10	NCF2	1_183706275_A_G_b37	rs10911427	9.8e-29	0.51	Artery - Tibial
ENSG00000116701.10	NCF2	1_183707103_A_G_b37	rs7529946	9.8e-29	0.51	Artery - Tibial
ENSG00000116701.10	NCF2	1_183707989_C_T_b37	rs12133760	9.8e-29	0.51	Artery - Tibial
ENSG00000116701.10	NCF2	1_183708921_T_C_b37	rs12760943	9.8e-29	0.51	Artery - Tibial
ENSG00000116701.10	NCF2	1_183682307_T_C_b37	rs6698736	1e-28	0.51	Artery - Tibial
ENSG00000116701.10	NCF2	1_183683749_C_G_b37	rs12119579	1e-28	0.51	Artery - Tibial
ENSG00000116701.10	NCF2	1_183684635_G_GT_b37	rs397935294	1e-28	0.51	Artery - Tibial
ENSG00000116701.10	NCF2	1_183687001_A_G_b37	rs12145081	1.1e-28	0.51	Artery - Tibial
ENSG00000116701.10	NCF2	1_183700152_A_G_b37	rs4087609	1.1e-28	0.51	Artery - Tibial
ENSG00000116701.10	NCF2	1_183702071_G_C_b37	rs10911426	1.1e-28	0.51	Artery - Tibial
ENSG00000116701.10	NCF2	1_183702455_T_A_b37	rs7536447	1.1e-28	0.51	Artery - Tibial
ENSG00000116701.10	NCF2	1_183702926_G_A_b37	rs7525146	1.2e-28	0.51	Artery - Tibial
ENSG00000116701.10	NCF2	1_183714485_T_TCA_b37	rs10678317	1.4e-28	0.51	Artery - Tibial
ENSG00000116701.10	NCF2	1_183709210_A_G_b37	rs10911428	1.4e-28	0.51	Artery - Tibial
ENSG00000116701.10	NCF2	1_183709348_C_T_b37	rs6658466	1.4e-28	0.51	Artery - Tibial
ENSG00000116701.10	NCF2	1_183709692_C_G_b37	rs6658871	1.4e-28	0.51	Artery - Tibial
ENSG00000116701.10	NCF2	1_183710963_C_T_b37	rs7520083	1.4e-28	0.51	Artery - Tibial
ENSG00000116701.10	NCF2	1_183712910_AC_A_b37	rs34055777	1.4e-28	0.51	Artery - Tibial
ENSG00000116701.10	NCF2	1_183681738_G_C_b37	rs1887246	1.5e-28	0.51	Artery - Tibial
ENSG00000116701.10	NCF2	1_183670425_C_T_b37	rs1926837	1.5e-28	0.51	Artery - Tibial
ENSG00000116701.10	NCF2	1_183701011_C_T_b37	rs12726055	1.5e-28	0.51	Artery - Tibial
ENSG00000116701.10	NCF2	1_183693046_T_G_b37	rs7524241	1.6e-28	0.51	Artery - Tibial
ENSG00000116701.10	NCF2	1_183707633_C_A_b37	rs7552887	1.7e-28	0.51	Artery - Tibial
ENSG00000116701.10	NCF2	1_183700590_C_A_b37	rs10752916	1.7e-28	0.51	Artery - Tibial
ENSG00000116701.10	NCF2	1_183700591_T_A_b37	rs10752917	1.7e-28	0.51	Artery - Tibial
ENSG00000116701.10	NCF2	1_183671283_A_G_b37	rs7543703	1.7e-28	0.51	Artery - Tibial
ENSG00000116701.10	NCF2	1_183561517_T_C_b37	rs10911367	1.8e-28	-0.52	Artery - Tibial
ENSG00000116701.10	NCF2	1_183696240_C_A_b37	rs56402527	1.9e-28	0.52	Artery - Tibial
ENSG00000116701.10	NCF2	1_183707703_C_G_b37	rs7552987	2.3e-28	0.51	Artery - Tibial
ENSG00000116701.10	NCF2	1_183713733_C_A_b37	rs12738712	2.5e-28	0.51	Artery - Tibial
ENSG00000116701.10	NCF2	1_183669720_A_G_b37	rs12138213	2.6e-28	0.51	Artery - Tibial
ENSG00000116701.10	NCF2	1_183713927_T_C_b37	rs7539345	2.7e-28	0.51	Artery - Tibial
ENSG00000116701.10	NCF2	1_183714149_A_C_b37	rs7552115	2.7e-28	0.51	Artery - Tibial
ENSG00000116701.10	NCF2	1_183666920_G_A_b37	rs4507976	2.8e-28	0.51	Artery - Tibial
ENSG00000116701.10	NCF2	1_183554714_C_T_b37	rs34423782	2.8e-28	-0.83	Skin - Not Sun Exposed (Suprapubic)
ENSG00000116701.10	NCF2	1_183563927_CT_C_b37	rs75499535	2.9e-28	-0.53	Artery - Tibial
ENSG00000116701.10	NCF2	1_183558996_G_A_b37	rs34110768	3.2e-28	-0.85	Skin - Not Sun Exposed (Suprapubic)
ENSG00000116701.10	NCF2	1_183563457_C_T_b37	rs10797889	3.5e-28	-0.52	Artery - Tibial
ENSG00000116701.10	NCF2	1_183558437_G_A_b37	rs35550074	3.5e-28	-0.52	Artery - Tibial
ENSG00000116701.10	NCF2	1_183700521_G_A_b37	rs10752915	3.7e-28	0.51	Artery - Tibial
ENSG00000116701.10	NCF2	1_183710374_A_T_b37	rs4489521	3.8e-28	0.5	Artery - Tibial
ENSG00000116701.10	NCF2	1_183704768_T_G_b37	rs12119590	3.9e-28	0.51	Artery - Tibial
ENSG00000116701.10	NCF2	1_183711483_C_T_b37	rs3820689	4.5e-28	0.51	Artery - Tibial
ENSG00000116701.10	NCF2	1_183695313_G_T_b37	rs6424908	4.5e-28	0.51	Artery - Tibial
ENSG00000116701.10	NCF2	1_183712775_T_G_b37	rs1887245	4.5e-28	0.51	Artery - Tibial
ENSG00000116701.10	NCF2	1_183559841_G_A_b37	rs12091406	5.2e-28	-0.84	Skin - Not Sun Exposed (Suprapubic)
ENSG00000116701.10	NCF2	1_183560035_G_A_b37	rs13306580	5.2e-28	-0.84	Skin - Not Sun Exposed (Suprapubic)
ENSG00000116701.10	NCF2	1_183560196_C_T_b37	rs4987079	5.2e-28	-0.84	Skin - Not Sun Exposed (Suprapubic)
ENSG00000116701.10	NCF2	1_183562517_A_C_b37	rs3754517	6.2e-28	-0.52	Artery - Tibial
ENSG00000116701.10	NCF2	1_183562603_T_C_b37	rs3754516	6.2e-28	-0.52	Artery - Tibial
ENSG00000116701.10	NCF2	1_183562782_C_A_b37	rs3754515	6.2e-28	-0.52	Artery - Tibial
ENSG00000116701.10	NCF2	1_183562833_C_T_b37	rs3754514	6.2e-28	-0.52	Artery - Tibial
ENSG00000116701.10	NCF2	1_183562888_A_G_b37	rs7533521	6.2e-28	-0.52	Artery - Tibial
ENSG00000116701.10	NCF2	1_183562264_A_AAGTCTTAGCACCTCAGAT_b37	rs369465356	6.5e-28	-0.52	Artery - Tibial
ENSG00000116701.10	NCF2	1_183562932_C_T_b37	rs7556061	8.9e-28	-0.52	Artery - Tibial
ENSG00000116701.10	NCF2	1_183684569_G_A_b37	rs17559937	1e-27	0.51	Artery - Tibial
ENSG00000116701.10	NCF2	1_183679666_T_G_b37	rs35742190	1.9e-27	0.5	Artery - Tibial
ENSG00000116701.10	NCF2	1_183715357_G_T_b37	rs2148621	1.9e-27	0.5	Artery - Tibial
ENSG00000116701.10	NCF2	1_183679912_C_T_b37	rs12746073	2e-27	0.51	Artery - Tibial
ENSG00000116701.10	NCF2	1_183561560_C_A_b37	rs12066019	2.5e-27	-0.84	Skin - Not Sun Exposed (Suprapubic)
ENSG00000116701.10	NCF2	1_183561697_A_G_b37	rs12096702	2.5e-27	-0.84	Skin - Not Sun Exposed (Suprapubic)
ENSG00000116701.10	NCF2	1_183561725_G_T_b37	rs12086699	2.5e-27	-0.84	Skin - Not Sun Exposed (Suprapubic)
ENSG00000116701.10	NCF2	1_183556291_A_G_b37	rs789192	2.6e-27	-0.52	Artery - Tibial
ENSG00000116701.10	NCF2	1_183745530_G_A_b37	rs12136408	3.8e-27	0.5	Artery - Tibial
ENSG00000116701.10	NCF2	1_183698993_C_T_b37	rs7514445	8.4e-27	0.5	Artery - Tibial
ENSG00000116701.10	NCF2	1_183586329_G_A_b37	rs375178930	1.5e-26	-0.53	Artery - Tibial
ENSG00000116701.10	NCF2	1_183586330_C_T_b37	rs368090357	2.2e-26	-0.53	Artery - Tibial
ENSG00000116701.10	NCF2	1_183717729_T_G_b37	rs7535084	4.5e-26	0.49	Artery - Tibial
ENSG00000116701.10	NCF2	1_183565740_CTACTAAAAATAG_C_b37	rs371019598	4.6e-26	-0.69	Skin - Sun Exposed (Lower leg)
ENSG00000116701.10	NCF2	1_183725668_A_G_b37	rs12736382	5e-26	0.5	Artery - Tibial
ENSG00000116701.10	NCF2	1_183737203_T_C_b37	rs6664373	1e-25	0.49	Artery - Tibial
ENSG00000116701.10	NCF2	1_183738565_T_C_b37	rs1926835	1e-25	0.49	Artery - Tibial
ENSG00000116701.10	NCF2	1_183750249_T_C_b37	rs1926833	1e-25	0.49	Artery - Tibial
ENSG00000116701.10	NCF2	1_183752588_T_C_b37	rs10911436	1e-25	0.49	Artery - Tibial
ENSG00000116701.10	NCF2	1_183753930_A_T_b37	rs7519596	1e-25	0.49	Artery - Tibial
ENSG00000116701.10	NCF2	1_183738892_G_T_b37	rs10911432	1.1e-25	0.49	Artery - Tibial
ENSG00000116701.10	NCF2	1_183719759_TGGA_T_b37	rs367640092	1.1e-25	0.49	Artery - Tibial
ENSG00000116701.10	NCF2	1_183726404_A_G_b37	rs12737637	1.1e-25	0.49	Artery - Tibial
ENSG00000116701.10	NCF2	1_183715181_T_G_b37	rs2182593	1.2e-25	0.5	Artery - Tibial
ENSG00000116701.10	NCF2	1_183725185_G_A_b37	rs12070290	1.2e-25	0.49	Artery - Tibial
ENSG00000116701.10	NCF2	1_183727400_T_C_b37	rs6424910	1.5e-25	0.49	Artery - Tibial
ENSG00000116701.10	NCF2	1_183720001_G_T_b37	rs12126025	1.5e-25	0.49	Artery - Tibial
ENSG00000116701.10	NCF2	1_183558423_G_A_b37	rs35667872	1.5e-25	-0.64	Skin - Sun Exposed (Lower leg)
ENSG00000116701.10	NCF2	1_183716548_T_C_b37	rs6695689	1.6e-25	0.49	Artery - Tibial
ENSG00000116701.10	NCF2	1_183720434_A_G_b37	rs2148622	1.6e-25	0.49	Artery - Tibial
ENSG00000116701.10	NCF2	1_183722930_A_G_b37	rs7516454	1.6e-25	0.49	Artery - Tibial
ENSG00000116701.10	NCF2	1_183724424_C_T_b37	rs12139504	1.6e-25	0.49	Artery - Tibial
ENSG00000116701.10	NCF2	1_183728854_T_G_b37	rs1112003	1.6e-25	0.49	Artery - Tibial
ENSG00000116701.10	NCF2	1_183721595_T_C_b37	rs10127868	1.7e-25	0.49	Artery - Tibial
ENSG00000116701.10	NCF2	1_183717664_T_C_b37	rs7535070	1.7e-25	0.49	Artery - Tibial
ENSG00000116701.10	NCF2	1_183721649_T_C_b37	rs10127870	1.7e-25	0.49	Artery - Tibial
ENSG00000116701.10	NCF2	1_183751640_T_C_b37	rs10911435	1.8e-25	0.49	Artery - Tibial
ENSG00000116701.10	NCF2	1_183725869_C_G_b37	rs12141506	1.8e-25	0.49	Artery - Tibial
ENSG00000116701.10	NCF2	1_183738121_A_G_b37	rs4592228	1.9e-25	0.49	Artery - Tibial
ENSG00000116701.10	NCF2	1_183563840_C_T_b37	rs11580439	1.9e-25	-0.77	Skin - Not Sun Exposed (Suprapubic)
ENSG00000116701.10	NCF2	1_183558174_T_C_b37	rs12094036	2.4e-25	-0.64	Skin - Sun Exposed (Lower leg)
ENSG00000116701.10	NCF2	1_183558357_A_G_b37	rs34459587	2.4e-25	-0.64	Skin - Sun Exposed (Lower leg)
ENSG00000116701.10	NCF2	1_183558438_A_G_b37	rs35423398	2.4e-25	-0.64	Skin - Sun Exposed (Lower leg)
ENSG00000116701.10	NCF2	1_183725087_C_T_b37	rs12090437	2.5e-25	0.49	Artery - Tibial
ENSG00000116701.10	NCF2	1_183720044_T_C_b37	rs10128040	3.5e-25	0.48	Artery - Tibial
ENSG00000116701.10	NCF2	1_183718735_G_A_b37	rs12727643	5.2e-25	0.48	Artery - Tibial
ENSG00000116701.10	NCF2	1_183560192_C_T_b37	rs4987080	5.3e-25	-0.63	Skin - Sun Exposed (Lower leg)
ENSG00000116701.10	NCF2	1_183726312_C_T_b37	rs35822817	5.6e-25	0.48	Artery - Tibial
ENSG00000116701.10	NCF2	1_183566431_A_G_b37	rs10797893	6.1e-25	-0.68	Skin - Sun Exposed (Lower leg)
ENSG00000116701.10	NCF2	1_183559704_A_C_b37	rs2274065	8.4e-25	-0.63	Skin - Sun Exposed (Lower leg)
ENSG00000116701.10	NCF2	1_183559861_T_C_b37	rs2333681	8.4e-25	-0.63	Skin - Sun Exposed (Lower leg)
ENSG00000116701.10	NCF2	1_183561285_T_C_b37	rs10911366	8.4e-25	-0.63	Skin - Sun Exposed (Lower leg)
ENSG00000116701.10	NCF2	1_183739363_C_T_b37	rs1926834	9e-25	0.49	Artery - Tibial
ENSG00000116701.10	NCF2	1_183561441_T_G_b37	rs12057355	1e-24	-0.63	Skin - Sun Exposed (Lower leg)
ENSG00000116701.10	NCF2	1_183560761_A_G_b37	rs2333682	1.2e-24	-0.63	Skin - Sun Exposed (Lower leg)
ENSG00000116701.10	NCF2	1_183561518_G_C_b37	rs12086606	1.2e-24	-0.63	Skin - Sun Exposed (Lower leg)
ENSG00000116701.10	NCF2	1_183561524_T_C_b37	rs12091848	1.2e-24	-0.63	Skin - Sun Exposed (Lower leg)
ENSG00000116701.10	NCF2	1_183724611_G_A_b37	rs10911430	1.7e-24	0.48	Artery - Tibial
ENSG00000116701.10	NCF2	1_183559105_G_A_b37	rs10911365	1.8e-24	-0.64	Skin - Sun Exposed (Lower leg)
ENSG00000116701.10	NCF2	1_183554449_T_C_b37	rs699240	2.3e-24	-0.49	Artery - Tibial
ENSG00000116701.10	NCF2	1_183567676_A_G_b37	rs61685359	3.4e-24	-0.67	Skin - Sun Exposed (Lower leg)
ENSG00000116701.10	NCF2	1_183567132_C_T_b37	rs41263646	3.7e-24	-0.67	Skin - Sun Exposed (Lower leg)
ENSG00000116701.10	NCF2	1_183555779_C_T_b37	rs11578964	7.1e-24	-0.51	Artery - Tibial
ENSG00000116701.10	NCF2	1_183724633_T_C_b37	rs12129521	8.3e-24	0.48	Artery - Tibial
ENSG00000116701.10	NCF2	1_183556620_T_C_b37	rs3903837	8.6e-24	-0.5	Artery - Tibial
ENSG00000116701.10	NCF2	1_183583960_G_A_b37	rs74862432	3.8e-23	-0.51	Artery - Tibial
ENSG00000116701.10	NCF2	1_183555370_A_G_b37	rs35049461	4.5e-23	-0.5	Artery - Tibial
ENSG00000116701.10	NCF2	1_183555373_C_G_b37	rs34715440	4.5e-23	-0.5	Artery - Tibial
ENSG00000116701.10	NCF2	1_183566913_C_T_b37	rs41439047	2.1e-22	-0.51	Artery - Tibial
ENSG00000116701.10	NCF2	1_183570545_G_T_b37	rs10489762	2.1e-22	-0.51	Artery - Tibial
ENSG00000116701.10	NCF2	1_183579599_C_T_b37	rs2761557	7.3e-22	-0.5	Artery - Tibial
ENSG00000116701.10	NCF2	1_183581822_C_T_b37	rs2761567	7.3e-22	-0.5	Artery - Tibial
ENSG00000116701.10	NCF2	1_183575927_TAGCACTTTGGGAGGCTGTAATCTC_T_b37	rs373084731	1.5e-21	-0.5	Artery - Tibial
ENSG00000116701.10	NCF2	1_183581976_C_T_b37	rs2478758	1.6e-21	-0.5	Artery - Tibial
ENSG00000116701.10	NCF2	1_183606747_C_A_b37	rs1174686	1.8e-21	-0.5	Artery - Tibial
ENSG00000116701.10	NCF2	1_183612097_C_T_b37	rs1174688	2.4e-21	-0.5	Artery - Tibial
ENSG00000116701.10	NCF2	1_183567085_G_A_b37	rs35682376	2.5e-21	-0.49	Artery - Tibial
ENSG00000116701.10	NCF2	1_183656278_T_C_b37	rs6664058	3e-21	0.5	Artery - Tibial
ENSG00000116701.10	NCF2	1_183584443_TCTCC_T_b37	rs57926010	3.1e-21	-0.5	Artery - Tibial
ENSG00000116701.10	NCF2	1_183584455_CCCAGG_C_b37	rs57302350	3.1e-21	-0.5	Artery - Tibial
ENSG00000116701.10	NCF2	1_183584462_TGC_T_b37	rs60704058	3.1e-21	-0.5	Artery - Tibial
ENSG00000116701.10	NCF2	1_183762403_G_A_b37	rs2500099	3.5e-21	0.46	Artery - Tibial
ENSG00000116701.10	NCF2	1_183677511_C_T_b37	rs10911420	6.7e-21	0.47	Artery - Tibial
ENSG00000116701.10	NCF2	1_183637082_ACT_A_b37	rs60783383	6.8e-21	-0.5	Artery - Tibial
ENSG00000116701.10	NCF2	1_183655833_G_A_b37	rs9650989	7.1e-21	0.5	Artery - Tibial
ENSG00000116701.10	NCF2	1_183604152_C_G_b37	rs61811187	8.1e-21	-0.5	Artery - Tibial
ENSG00000116701.10	NCF2	1_183623619_G_C_b37	rs1184639	8.5e-21	-0.49	Artery - Tibial
ENSG00000116701.10	NCF2	1_183612717_C_T_b37	rs1174689	8.9e-21	-0.49	Artery - Tibial
ENSG00000116701.10	NCF2	1_183620363_G_T_b37	rs1174659	9.2e-21	-0.49	Artery - Tibial
ENSG00000116701.10	NCF2	1_183622658_A_G_b37	rs1174660	9.2e-21	-0.49	Artery - Tibial
ENSG00000116701.10	NCF2	1_183654977_C_T_b37	rs1952236	9.6e-21	0.49	Artery - Tibial
ENSG00000116701.10	NCF2	1_183654325_C_T_b37	rs1174685	9.9e-21	-0.49	Artery - Tibial
ENSG00000116701.10	NCF2	1_183639173_C_T_b37	rs1174674	1.1e-20	-0.49	Artery - Tibial
ENSG00000116701.10	NCF2	1_183629150_T_G_b37	rs1174667	1.1e-20	-0.49	Artery - Tibial
ENSG00000116701.10	NCF2	1_183581965_A_G_b37	rs2761569	1.4e-20	-0.49	Artery - Tibial
ENSG00000116701.10	NCF2	1_183593512_G_A_b37	rs4084535	1.5e-20	-0.49	Artery - Tibial
ENSG00000116701.10	NCF2	1_183598350_A_T_b37	rs4652822	1.6e-20	-0.49	Artery - Tibial
ENSG00000116701.10	NCF2	1_183665652_C_G_b37	rs2148624	1.6e-20	0.49	Artery - Tibial
ENSG00000116701.10	NCF2	1_183616687_G_A_b37	rs1174656	1.7e-20	-0.49	Artery - Tibial
ENSG00000116701.10	NCF2	1_183591847_T_A_b37	rs2862067	1.7e-20	-0.49	Artery - Tibial
ENSG00000116701.10	NCF2	1_183632899_G_A_b37	rs1174671	1.9e-20	-0.49	Artery - Tibial
ENSG00000116701.10	NCF2	1_183590912_G_A_b37	rs2767301	2e-20	-0.48	Artery - Tibial
ENSG00000116701.10	NCF2	1_183592416_G_T_b37	rs2761573	2e-20	-0.48	Artery - Tibial
ENSG00000116701.10	NCF2	1_183661032_A_G_b37	rs2182595	2.3e-20	0.5	Artery - Tibial
ENSG00000116701.10	NCF2	1_183626523_C_G_b37	rs1174663	2.9e-20	-0.5	Artery - Tibial
ENSG00000116701.10	NCF2	1_183646354_T_C_b37	rs1174679	2.9e-20	-0.49	Artery - Tibial
ENSG00000116701.10	NCF2	1_183649710_T_C_b37	rs1174682	2.9e-20	-0.49	Artery - Tibial
ENSG00000116701.10	NCF2	1_183592570_C_T_b37	rs17488675	3.1e-20	-0.49	Artery - Tibial
ENSG00000116701.10	NCF2	1_183563381_A_AAAACACT_b37	rs77463392	4e-20	-0.47	Artery - Tibial
ENSG00000116701.10	NCF2	1_183591031_A_G_b37	rs4651154	5.1e-20	-0.49	Artery - Tibial
ENSG00000116701.10	NCF2	1_183565797_G_A_b37	rs2333684	5.4e-20	-0.46	Artery - Tibial
ENSG00000116701.10	NCF2	1_183603399_A_G_b37	rs2767304	5.6e-20	-0.47	Artery - Tibial
ENSG00000116701.10	NCF2	1_183627616_C_T_b37	rs1177778	5.9e-20	-0.47	Artery - Tibial
ENSG00000116701.10	NCF2	1_183616926_T_C_b37	rs1174657	5.9e-20	-0.47	Artery - Tibial
ENSG00000116701.10	NCF2	1_183617105_A_G_b37	rs1174658	5.9e-20	-0.47	Artery - Tibial
ENSG00000116701.10	NCF2	1_183589923_A_ATCTT_b37	rs57134356	6.1e-20	-0.47	Artery - Tibial
ENSG00000116701.10	NCF2	1_183595069_C_G_b37	rs3856127	6.8e-20	-0.48	Artery - Tibial
ENSG00000116701.10	NCF2	1_183595037_G_A_b37	rs2761574	7.2e-20	-0.47	Artery - Tibial
ENSG00000116701.10	NCF2	1_183647777_G_A_b37	rs1174680	7.2e-20	-0.47	Artery - Tibial
ENSG00000116701.10	NCF2	1_183566100_C_T_b37	rs2333686	9.1e-20	-0.46	Artery - Tibial
ENSG00000116701.10	NCF2	1_183737091_G_GA_b37	rs397956779	9.6e-20	0.48	Artery - Tibial
ENSG00000116701.10	NCF2	1_183714868_GT_G_b37	rs141349113	1.1e-19	-0.85	Skin - Sun Exposed (Lower leg)
ENSG00000116701.10	NCF2	1_183655567_G_GT_b37	rs397825676	1.3e-19	0.49	Artery - Tibial
ENSG00000116701.10	NCF2	1_183615554_T_TTA_b37	rs148078350	1.6e-19	-0.51	Artery - Tibial
ENSG00000116701.10	NCF2	1_183601331_C_T_b37	rs17436125	1.7e-19	-0.48	Artery - Tibial
ENSG00000116701.10	NCF2	1_183627623_T_C_b37	rs1174664	1.7e-19	-0.46	Artery - Tibial
ENSG00000116701.10	NCF2	1_183648402_C_T_b37	rs1174681	1.7e-19	-0.47	Artery - Tibial
ENSG00000116701.10	NCF2	1_183565989_T_C_b37	rs2333685	2e-19	-0.46	Artery - Tibial
ENSG00000116701.10	NCF2	1_183668030_T_C_b37	rs6424903	2.9e-19	0.47	Artery - Tibial
ENSG00000116701.10	NCF2	1_183668033_C_T_b37	rs6704283	2.9e-19	0.47	Artery - Tibial
ENSG00000116701.10	NCF2	1_183639879_G_T_b37	rs1174675	3.5e-19	-0.46	Artery - Tibial
ENSG00000116701.10	NCF2	1_183554281_A_G_b37	rs789185	3.6e-19	-0.45	Artery - Tibial
ENSG00000116701.10	NCF2	1_183667957_C_G_b37	rs6424902	3.7e-19	0.46	Artery - Tibial
ENSG00000116701.10	NCF2	1_183668132_A_G_b37	rs6424904	3.7e-19	0.46	Artery - Tibial
ENSG00000116701.10	NCF2	1_183634330_C_T_b37	rs1174672	4.4e-19	-0.46	Artery - Tibial
ENSG00000116701.10	NCF2	1_183667064_T_G_b37	rs4497174	5e-19	0.47	Artery - Tibial
ENSG00000116701.10	NCF2	1_183667100_A_G_b37	rs4638079	5.1e-19	0.46	Artery - Tibial
ENSG00000116701.10	NCF2	1_183641685_G_A_b37	rs1186452	5.3e-19	-0.46	Artery - Tibial
ENSG00000116701.10	NCF2	1_183690371_G_A_b37	rs1926825	1.3e-18	0.46	Artery - Tibial
ENSG00000116701.10	NCF2	1_183631859_A_G_b37	rs1174669	1.3e-18	-0.46	Artery - Tibial
ENSG00000116701.10	NCF2	1_183718530_T_A_b37	rs6684415	1.5e-18	0.46	Artery - Tibial
ENSG00000116701.10	NCF2	1_183696656_G_A_b37	rs6424909	2.4e-18	0.46	Artery - Tibial
ENSG00000116701.10	NCF2	1_183725852_C_G_b37	rs2491428	2.6e-18	-0.46	Artery - Tibial
ENSG00000116701.10	NCF2	1_183625210_A_G_b37	rs1174662	2.7e-18	-0.48	Artery - Tibial
ENSG00000116701.10	NCF2	1_183707595_A_C_b37	rs2491430	4.2e-18	-0.46	Artery - Tibial
ENSG00000116701.10	NCF2	1_183704015_T_C_b37	rs4146996	4.6e-18	0.45	Artery - Tibial
ENSG00000116701.10	NCF2	1_183708428_G_A_b37	rs6703990	4.7e-18	0.46	Artery - Tibial
ENSG00000116701.10	NCF2	1_183697699_A_ATTGT_b37	rs397810926	4.8e-18	0.45	Artery - Tibial
ENSG00000116701.10	NCF2	1_183685947_G_A_b37	rs6424907	4.9e-18	0.45	Artery - Tibial
ENSG00000116701.10	NCF2	1_183718763_G_A_b37	rs6671886	4.9e-18	0.45	Artery - Tibial
ENSG00000116701.10	NCF2	1_183728476_C_G_b37	rs4132276	4.9e-18	0.45	Artery - Tibial
ENSG00000116701.10	NCF2	1_183731104_A_T_b37	rs6673095	4.9e-18	0.45	Artery - Tibial
ENSG00000116701.10	NCF2	1_183736556_T_C_b37	rs6679538	4.9e-18	0.45	Artery - Tibial
ENSG00000116701.10	NCF2	1_183736732_G_A_b37	rs6666992	4.9e-18	0.45	Artery - Tibial
ENSG00000116701.10	NCF2	1_183754706_T_C_b37	rs1952234	4.9e-18	0.45	Artery - Tibial
ENSG00000116701.10	NCF2	1_183729184_C_CA_b37	rs34531055	5.7e-18	0.46	Artery - Tibial
ENSG00000116701.10	NCF2	1_183729186_C_T_b37	rs35039854	5.7e-18	0.46	Artery - Tibial
ENSG00000116701.10	NCF2	1_183751004_C_T_b37	rs10797910	6.6e-18	0.45	Artery - Tibial
ENSG00000116701.10	NCF2	1_183667180_A_G_b37	rs4388653	6.7e-18	0.44	Artery - Tibial
ENSG00000116701.10	NCF2	1_183733752_T_C_b37	rs1926836	1e-17	0.45	Artery - Tibial
ENSG00000116701.10	NCF2	1_183705975_G_T_b37	rs9645305	1.2e-17	0.45	Artery - Tibial
ENSG00000116701.10	NCF2	1_183712506_C_CAAGAACTTCGA_b37	rs61514348	1.8e-17	0.45	Artery - Tibial
ENSG00000116701.10	NCF2	1_183742384_A_G_b37	rs10752919	1.8e-17	0.46	Artery - Tibial
ENSG00000116701.10	NCF2	1_183555454_A_C_b37	rs35304105	2e-17	-0.47	Artery - Tibial
ENSG00000116701.10	NCF2	1_183565740_CTACTAAAAATAG_C_b37	rs371019598	2.3e-17	-0.68	Skin - Not Sun Exposed (Suprapubic)
ENSG00000116701.10	NCF2	1_183585119_A_G_b37	rs12746458	7.8e-17	0.46	Artery - Tibial
ENSG00000116701.10	NCF2	1_183556395_T_C_b37	rs11588654	8.9e-17	-0.46	Artery - Tibial
ENSG00000116701.10	NCF2	1_183558174_T_C_b37	rs12094036	1.3e-16	-0.61	Skin - Not Sun Exposed (Suprapubic)
ENSG00000116701.10	NCF2	1_183558357_A_G_b37	rs34459587	1.3e-16	-0.61	Skin - Not Sun Exposed (Suprapubic)
ENSG00000116701.10	NCF2	1_183558423_G_A_b37	rs35667872	1.3e-16	-0.61	Skin - Not Sun Exposed (Suprapubic)
ENSG00000116701.10	NCF2	1_183558438_A_G_b37	rs35423398	1.3e-16	-0.61	Skin - Not Sun Exposed (Suprapubic)
ENSG00000116701.10	NCF2	1_183559105_G_A_b37	rs10911365	1.3e-16	-0.61	Skin - Not Sun Exposed (Suprapubic)
ENSG00000116701.10	NCF2	1_183724561_T_C_b37	rs10797905	1.8e-16	0.44	Artery - Tibial
ENSG00000116701.10	NCF2	1_183725260_A_C_b37	rs10737247	2.5e-16	0.44	Artery - Tibial
ENSG00000116701.10	NCF2	1_183572818_T_C_b37	rs76210171	2.8e-16	-0.61	Skin - Sun Exposed (Lower leg)
ENSG00000116701.10	NCF2	1_183740750_C_T_b37	rs6424911	3.1e-16	0.42	Artery - Tibial
ENSG00000116701.10	NCF2	1_183752491_C_T_b37	rs4497164	6e-16	0.42	Artery - Tibial
ENSG00000116701.10	NCF2	1_183754672_C_T_b37	rs1952235	6e-16	0.42	Artery - Tibial
ENSG00000116701.10	NCF2	1_183559704_A_C_b37	rs2274065	7.6e-16	-0.6	Skin - Not Sun Exposed (Suprapubic)
ENSG00000116701.10	NCF2	1_183559861_T_C_b37	rs2333681	7.6e-16	-0.6	Skin - Not Sun Exposed (Suprapubic)
ENSG00000116701.10	NCF2	1_183560192_C_T_b37	rs4987080	7.6e-16	-0.6	Skin - Not Sun Exposed (Suprapubic)
ENSG00000116701.10	NCF2	1_183560761_A_G_b37	rs2333682	7.6e-16	-0.6	Skin - Not Sun Exposed (Suprapubic)
ENSG00000116701.10	NCF2	1_183561285_T_C_b37	rs10911366	7.6e-16	-0.6	Skin - Not Sun Exposed (Suprapubic)
ENSG00000116701.10	NCF2	1_183561441_T_G_b37	rs12057355	7.6e-16	-0.6	Skin - Not Sun Exposed (Suprapubic)
ENSG00000116701.10	NCF2	1_183561518_G_C_b37	rs12086606	8.1e-16	-0.6	Skin - Not Sun Exposed (Suprapubic)
ENSG00000116701.10	NCF2	1_183561524_T_C_b37	rs12091848	8.1e-16	-0.6	Skin - Not Sun Exposed (Suprapubic)
ENSG00000116701.10	NCF2	1_183759410_G_A_b37	rs4609388	9e-16	0.41	Artery - Tibial
ENSG00000116701.10	NCF2	1_183566431_A_G_b37	rs10797893	9.1e-16	-0.65	Skin - Not Sun Exposed (Suprapubic)
ENSG00000116701.10	NCF2	1_183573894_C_T_b37	rs75043422	1.2e-15	-0.61	Skin - Sun Exposed (Lower leg)
ENSG00000116701.10	NCF2	1_183567132_C_T_b37	rs41263646	1.6e-15	-0.64	Skin - Not Sun Exposed (Suprapubic)
ENSG00000116701.10	NCF2	1_183744893_G_A_b37	rs6676389	1.7e-15	0.42	Artery - Tibial
ENSG00000116701.10	NCF2	1_183741570_C_A_b37	rs7520591	1.9e-15	0.42	Artery - Tibial
ENSG00000116701.10	NCF2	1_183570909_C_T_b37	rs78977742	2.8e-15	-0.59	Skin - Sun Exposed (Lower leg)
ENSG00000116701.10	NCF2	1_183572486_T_C_b37	rs10081971	2.8e-15	-0.59	Skin - Sun Exposed (Lower leg)
ENSG00000116701.10	NCF2	1_183755037_G_T_b37	rs10157741	1e-14	0.41	Artery - Tibial
ENSG00000116701.10	NCF2	1_183581914_A_G_b37	rs12069669	1.4e-14	-0.53	Skin - Sun Exposed (Lower leg)
ENSG00000116701.10	NCF2	1_183581037_T_G_b37	rs10911374	1.5e-14	-0.53	Skin - Sun Exposed (Lower leg)
ENSG00000116701.10	NCF2	1_183750649_C_T_b37	rs11581495	2.1e-14	-0.87	Skin - Sun Exposed (Lower leg)
ENSG00000116701.10	NCF2	1_183582431_C_T_b37	rs10911376	2.4e-14	-0.53	Skin - Sun Exposed (Lower leg)
ENSG00000116701.10	NCF2	1_183584735_C_G_b37	rs28812191	7.1e-14	-0.51	Skin - Sun Exposed (Lower leg)
ENSG00000116701.10	NCF2	1_183567676_A_G_b37	rs61685359	7.7e-14	-0.58	Skin - Not Sun Exposed (Suprapubic)
ENSG00000116701.10	NCF2	1_183597537_C_T_b37	rs10911382	1e-13	-0.52	Skin - Sun Exposed (Lower leg)
ENSG00000116701.10	NCF2	1_183579492_T_TGGCA_b37	rs370739859	1.7e-13	-0.52	Skin - Sun Exposed (Lower leg)
ENSG00000116701.10	NCF2	1_183612828_C_T_b37	rs10911386	1.9e-13	-0.51	Skin - Sun Exposed (Lower leg)
ENSG00000116701.10	NCF2	1_183582098_T_C_b37	rs10911375	2.8e-13	-0.51	Skin - Sun Exposed (Lower leg)
ENSG00000116701.10	NCF2	1_183583916_C_G_b37	rs77466579	2.9e-13	-0.6	Skin - Not Sun Exposed (Suprapubic)
ENSG00000116701.10	NCF2	1_183618065_G_T_b37	rs12088609	2.9e-13	-0.51	Skin - Sun Exposed (Lower leg)
ENSG00000116701.10	NCF2	1_183606402_G_A_b37	rs59041516	3.4e-13	-0.51	Skin - Sun Exposed (Lower leg)
ENSG00000116701.10	NCF2	1_183582098_T_C_b37	rs10911375	3.4e-13	-0.58	Skin - Not Sun Exposed (Suprapubic)
ENSG00000116701.10	NCF2	1_183579492_T_TGGCA_b37	rs370739859	3.7e-13	-0.58	Skin - Not Sun Exposed (Suprapubic)
ENSG00000116701.10	NCF2	1_183605193_T_TG_b37	rs368849788	3.8e-13	-0.5	Skin - Sun Exposed (Lower leg)
ENSG00000116701.10	NCF2	1_183581037_T_G_b37	rs10911374	4.6e-13	-0.58	Skin - Not Sun Exposed (Suprapubic)
ENSG00000116701.10	NCF2	1_183581914_A_G_b37	rs12069669	5.1e-13	-0.58	Skin - Not Sun Exposed (Suprapubic)
ENSG00000116701.10	NCF2	1_183582431_C_T_b37	rs10911376	6.1e-13	-0.58	Skin - Not Sun Exposed (Suprapubic)
ENSG00000116701.10	NCF2	1_183583916_C_G_b37	rs77466579	1e-12	-0.51	Skin - Sun Exposed (Lower leg)
ENSG00000116701.10	NCF2	1_183597537_C_T_b37	rs10911382	1.2e-12	-0.58	Skin - Not Sun Exposed (Suprapubic)
ENSG00000116701.10	NCF2	1_183584735_C_G_b37	rs28812191	1.3e-12	-0.57	Skin - Not Sun Exposed (Suprapubic)
ENSG00000116701.10	NCF2	1_183583873_C_A_b37	rs140156940	1.5e-12	-0.59	Skin - Not Sun Exposed (Suprapubic)
ENSG00000116701.10	NCF2	1_183583873_C_A_b37	rs140156940	1.7e-12	-0.51	Skin - Sun Exposed (Lower leg)
ENSG00000116701.10	NCF2	1_183606402_G_A_b37	rs59041516	7.3e-12	-0.56	Skin - Not Sun Exposed (Suprapubic)
ENSG00000116701.10	NCF2	1_183618065_G_T_b37	rs12088609	7.3e-12	-0.56	Skin - Not Sun Exposed (Suprapubic)
ENSG00000116701.10	NCF2	1_183612828_C_T_b37	rs10911386	8.2e-12	-0.55	Skin - Not Sun Exposed (Suprapubic)
ENSG00000116701.10	NCF2	1_183572818_T_C_b37	rs76210171	2.4e-11	-0.62	Skin - Not Sun Exposed (Suprapubic)
ENSG00000116701.10	NCF2	1_183583892_A_G_b37	rs149830921	2.6e-11	-0.45	Skin - Sun Exposed (Lower leg)
ENSG00000116701.10	NCF2	1_183573894_C_T_b37	rs75043422	4.7e-11	-0.61	Skin - Not Sun Exposed (Suprapubic)
ENSG00000116701.10	NCF2	1_183561560_C_A_b37	rs12066019	5e-11	-0.42	Esophagus - Mucosa
ENSG00000116701.10	NCF2	1_183561697_A_G_b37	rs12096702	5e-11	-0.42	Esophagus - Mucosa
ENSG00000116701.10	NCF2	1_183561725_G_T_b37	rs12086699	5e-11	-0.42	Esophagus - Mucosa
ENSG00000116701.10	NCF2	1_183714868_GT_G_b37	rs141349113	6.1e-11	-0.73	Skin - Not Sun Exposed (Suprapubic)
ENSG00000116701.10	NCF2	1_183617266_C_G_b37	rs17436878	1.1e-10	0.38	Artery - Tibial
ENSG00000116701.10	NCF2	1_183558996_G_A_b37	rs34110768	1.2e-10	-0.41	Esophagus - Mucosa
ENSG00000116701.10	NCF2	1_183672732_C_T_b37	rs35641542	1.7e-10	0.38	Artery - Tibial
ENSG00000116701.10	NCF2	1_183559841_G_A_b37	rs12091406	1.9e-10	-0.4	Esophagus - Mucosa
ENSG00000116701.10	NCF2	1_183560035_G_A_b37	rs13306580	1.9e-10	-0.4	Esophagus - Mucosa
ENSG00000116701.10	NCF2	1_183554714_C_T_b37	rs34423782	2.8e-10	-0.39	Esophagus - Mucosa
ENSG00000116701.10	NCF2	1_183560196_C_T_b37	rs4987079	2.8e-10	-0.4	Esophagus - Mucosa
ENSG00000116701.10	NCF2	1_183570909_C_T_b37	rs78977742	4.1e-10	-0.57	Skin - Not Sun Exposed (Suprapubic)
ENSG00000116701.10	NCF2	1_183572486_T_C_b37	rs10081971	4.2e-10	-0.57	Skin - Not Sun Exposed (Suprapubic)
ENSG00000116701.10	NCF2	1_183563161_C_G_b37	rs11579965	4.4e-10	-0.4	Esophagus - Mucosa
ENSG00000116701.10	NCF2	1_183267544_A_AAGTGG_b37	rs148270014	6.5e-10	-0.4	Skin - Not Sun Exposed (Suprapubic)
ENSG00000116701.10	NCF2	1_183724561_T_C_b37	rs10797905	1.3e-09	-0.24	Esophagus - Mucosa
ENSG00000116701.10	NCF2	1_183650701_G_A_b37	rs1174684	1.3e-09	0.43	Skin - Not Sun Exposed (Suprapubic)
ENSG00000116701.10	NCF2	1_183650428_G_A_b37	rs1174683	1.9e-09	0.43	Skin - Not Sun Exposed (Suprapubic)
ENSG00000116701.10	NCF2	1_183725260_A_C_b37	rs10737247	2e-09	-0.24	Esophagus - Mucosa
ENSG00000116701.10	NCF2	1_183685947_G_A_b37	rs6424907	2.2e-09	-0.23	Esophagus - Mucosa
ENSG00000116701.10	NCF2	1_183704015_T_C_b37	rs4146996	2.2e-09	-0.23	Esophagus - Mucosa
ENSG00000116701.10	NCF2	1_183718763_G_A_b37	rs6671886	2.2e-09	-0.23	Esophagus - Mucosa
ENSG00000116701.10	NCF2	1_183728476_C_G_b37	rs4132276	2.2e-09	-0.23	Esophagus - Mucosa
ENSG00000116701.10	NCF2	1_183731104_A_T_b37	rs6673095	2.2e-09	-0.23	Esophagus - Mucosa
ENSG00000116701.10	NCF2	1_183733752_T_C_b37	rs1926836	2.2e-09	-0.23	Esophagus - Mucosa
ENSG00000116701.10	NCF2	1_183736556_T_C_b37	rs6679538	2.2e-09	-0.23	Esophagus - Mucosa
ENSG00000116701.10	NCF2	1_183736732_G_A_b37	rs6666992	2.2e-09	-0.23	Esophagus - Mucosa
ENSG00000116701.10	NCF2	1_183754706_T_C_b37	rs1952234	2.2e-09	-0.23	Esophagus - Mucosa
ENSG00000116701.10	NCF2	1_183742384_A_G_b37	rs10752919	2.2e-09	-0.24	Esophagus - Mucosa
ENSG00000116701.10	NCF2	1_183751004_C_T_b37	rs10797910	2.3e-09	-0.23	Esophagus - Mucosa
ENSG00000116701.10	NCF2	1_183701475_A_C_b37	rs10911425	2.4e-09	0.37	Artery - Tibial
ENSG00000116701.10	NCF2	1_183661032_A_G_b37	rs2182595	2.8e-09	-0.24	Esophagus - Mucosa
ENSG00000116701.10	NCF2	1_183712506_C_CAAGAACTTCGA_b37	rs61514348	3e-09	-0.23	Esophagus - Mucosa
ENSG00000116701.10	NCF2	1_183697699_A_ATTGT_b37	rs397810926	3.1e-09	-0.23	Esophagus - Mucosa
ENSG00000116701.10	NCF2	1_183725820_T_C_b37	rs12130615	3.2e-09	0.37	Artery - Tibial
ENSG00000116701.10	NCF2	1_183586329_G_A_b37	rs375178930	3.2e-09	0.49	Pituitary
ENSG00000116701.10	NCF2	1_183348393_G_A_b37	rs116825143	3.2e-09	-0.47	Skin - Not Sun Exposed (Suprapubic)
ENSG00000116701.10	NCF2	1_183379958_T_C_b37	rs10911329	3.2e-09	-0.47	Skin - Not Sun Exposed (Suprapubic)
ENSG00000116701.10	NCF2	1_183718530_T_A_b37	rs6684415	3.5e-09	-0.23	Esophagus - Mucosa
ENSG00000116701.10	NCF2	1_183586330_C_T_b37	rs368090357	3.6e-09	0.49	Pituitary
ENSG00000116701.10	NCF2	1_183667064_T_G_b37	rs4497174	3.6e-09	-0.23	Esophagus - Mucosa
ENSG00000116701.10	NCF2	1_183705975_G_T_b37	rs9645305	3.6e-09	-0.23	Esophagus - Mucosa
ENSG00000116701.10	NCF2	1_183605193_T_TG_b37	rs368849788	3.9e-09	-0.47	Skin - Not Sun Exposed (Suprapubic)
ENSG00000116701.10	NCF2	1_183685414_A_G_b37	rs16861502	5.1e-09	-0.41	Skin - Not Sun Exposed (Suprapubic)
ENSG00000116701.10	NCF2	1_183729184_C_CA_b37	rs34531055	5.1e-09	-0.23	Esophagus - Mucosa
ENSG00000116701.10	NCF2	1_183729186_C_T_b37	rs35039854	5.1e-09	-0.23	Esophagus - Mucosa
ENSG00000116701.10	NCF2	1_183690371_G_A_b37	rs1926825	7e-09	-0.23	Esophagus - Mucosa
ENSG00000116701.10	NCF2	1_183655567_G_GT_b37	rs397825676	7.6e-09	-0.23	Esophagus - Mucosa
ENSG00000116701.10	NCF2	1_183399624_G_A_b37	rs11805957	8.1e-09	-0.35	Skin - Sun Exposed (Lower leg)
ENSG00000116701.10	NCF2	1_183700018_T_C_b37	rs10494567	8.4e-09	-0.4	Skin - Not Sun Exposed (Suprapubic)
ENSG00000116701.10	NCF2	1_183612097_C_T_b37	rs1174688	8.6e-09	0.23	Esophagus - Mucosa
ENSG00000116701.10	NCF2	1_183667375_A_C_b37	rs10911417	9.1e-09	-0.4	Skin - Not Sun Exposed (Suprapubic)
ENSG00000116701.10	NCF2	1_183667908_T_C_b37	rs10494565	9.1e-09	-0.4	Skin - Not Sun Exposed (Suprapubic)
ENSG00000116701.10	NCF2	1_183671821_C_T_b37	rs12092963	9.1e-09	-0.4	Skin - Not Sun Exposed (Suprapubic)
ENSG00000116701.10	NCF2	1_183674209_C_T_b37	rs12096023	9.1e-09	-0.4	Skin - Not Sun Exposed (Suprapubic)
ENSG00000116701.10	NCF2	1_183675931_G_A_b37	rs10911419	9.1e-09	-0.4	Skin - Not Sun Exposed (Suprapubic)
ENSG00000116701.10	NCF2	1_183693410_A_G_b37	rs6681332	9.1e-09	-0.4	Skin - Not Sun Exposed (Suprapubic)
ENSG00000116701.10	NCF2	1_183694212_T_C_b37	rs6673065	9.1e-09	-0.4	Skin - Not Sun Exposed (Suprapubic)
ENSG00000116701.10	NCF2	1_183694248_G_A_b37	rs6660434	9.1e-09	-0.4	Skin - Not Sun Exposed (Suprapubic)
ENSG00000116701.10	NCF2	1_183696656_G_A_b37	rs6424909	9.3e-09	-0.22	Esophagus - Mucosa
ENSG00000116701.10	NCF2	1_183708428_G_A_b37	rs6703990	9.8e-09	-0.23	Esophagus - Mucosa
ENSG00000116701.10	NCF2	1_183394478_G_T_b37	rs10797882	9.8e-09	-0.34	Skin - Sun Exposed (Lower leg)
ENSG00000116701.10	NCF2	1_183357428_G_GA_b37	rs150652301	1e-08	-0.46	Skin - Not Sun Exposed (Suprapubic)
ENSG00000116701.10	NCF2	1_183567085_G_A_b37	rs35682376	1.1e-08	0.22	Esophagus - Mucosa
ENSG00000116701.10	NCF2	1_183583960_G_A_b37	rs74862432	1.1e-08	0.22	Esophagus - Mucosa
ENSG00000116701.10	NCF2	1_183629150_T_G_b37	rs1174667	1.1e-08	0.23	Esophagus - Mucosa
ENSG00000116701.10	NCF2	1_183655833_G_A_b37	rs9650989	1.1e-08	-0.23	Esophagus - Mucosa
ENSG00000116701.10	NCF2	1_183656278_T_C_b37	rs6664058	1.1e-08	-0.23	Esophagus - Mucosa
ENSG00000116701.10	NCF2	1_183759203_C_A_b37	rs71632195	1.2e-08	0.69	Artery - Tibial
ENSG00000116701.10	NCF2	1_183639173_C_T_b37	rs1174674	1.2e-08	0.22	Esophagus - Mucosa
ENSG00000116701.10	NCF2	1_183646354_T_C_b37	rs1174679	1.2e-08	0.22	Esophagus - Mucosa
ENSG00000116701.10	NCF2	1_183649710_T_C_b37	rs1174682	1.2e-08	0.22	Esophagus - Mucosa
ENSG00000116701.10	NCF2	1_183654977_C_T_b37	rs1952236	1.2e-08	-0.22	Esophagus - Mucosa
ENSG00000116701.10	NCF2	1_183626523_C_G_b37	rs1174663	1.2e-08	0.23	Esophagus - Mucosa
ENSG00000116701.10	NCF2	1_183675576_C_T_b37	rs34232349	1.2e-08	0.82	Artery - Tibial
ENSG00000116701.10	NCF2	1_183581976_C_T_b37	rs2478758	1.3e-08	0.22	Esophagus - Mucosa
ENSG00000116701.10	NCF2	1_183581965_A_G_b37	rs2761569	1.4e-08	0.22	Esophagus - Mucosa
ENSG00000116701.10	NCF2	1_183382908_A_AT_b37	rs35058416	1.4e-08	-0.45	Skin - Not Sun Exposed (Suprapubic)
ENSG00000116701.10	NCF2	1_183665652_C_G_b37	rs2148624	1.4e-08	-0.22	Esophagus - Mucosa
ENSG00000116701.10	NCF2	1_183703612_C_T_b37	rs12075254	1.5e-08	-0.4	Skin - Not Sun Exposed (Suprapubic)
ENSG00000116701.10	NCF2	1_183620363_G_T_b37	rs1174659	1.5e-08	0.22	Esophagus - Mucosa
ENSG00000116701.10	NCF2	1_183622658_A_G_b37	rs1174660	1.5e-08	0.22	Esophagus - Mucosa
ENSG00000116701.10	NCF2	1_183579599_C_T_b37	rs2761557	1.5e-08	0.22	Esophagus - Mucosa
ENSG00000116701.10	NCF2	1_183581822_C_T_b37	rs2761567	1.5e-08	0.22	Esophagus - Mucosa
ENSG00000116701.10	NCF2	1_183616687_G_A_b37	rs1174656	1.6e-08	0.22	Esophagus - Mucosa
ENSG00000116701.10	NCF2	1_183718836_G_A_b37	rs6671911	1.6e-08	-0.4	Skin - Not Sun Exposed (Suprapubic)
ENSG00000116701.10	NCF2	1_183736952_G_A_b37	rs77461455	1.6e-08	-0.4	Skin - Not Sun Exposed (Suprapubic)
ENSG00000116701.10	NCF2	1_183749506_G_A_b37	rs2148623	1.6e-08	-0.4	Skin - Not Sun Exposed (Suprapubic)
ENSG00000116701.10	NCF2	1_183750649_C_T_b37	rs11581495	1.7e-08	-0.76	Skin - Not Sun Exposed (Suprapubic)
ENSG00000116701.10	NCF2	1_183632899_G_A_b37	rs1174671	1.8e-08	0.22	Esophagus - Mucosa
ENSG00000116701.10	NCF2	1_183402200_C_T_b37	rs150806476	1.9e-08	-0.34	Skin - Sun Exposed (Lower leg)
ENSG00000116701.10	NCF2	1_183584443_TCTCC_T_b37	rs57926010	2.1e-08	0.22	Esophagus - Mucosa
ENSG00000116701.10	NCF2	1_183584455_CCCAGG_C_b37	rs57302350	2.1e-08	0.22	Esophagus - Mucosa
ENSG00000116701.10	NCF2	1_183623619_G_C_b37	rs1184639	2.2e-08	0.22	Esophagus - Mucosa
ENSG00000116701.10	NCF2	1_183566913_C_T_b37	rs41439047	2.2e-08	0.22	Esophagus - Mucosa
ENSG00000116701.10	NCF2	1_183570545_G_T_b37	rs10489762	2.2e-08	0.22	Esophagus - Mucosa
ENSG00000116701.10	NCF2	1_183612717_C_T_b37	rs1174689	2.5e-08	0.22	Esophagus - Mucosa
ENSG00000116701.10	NCF2	1_183637082_ACT_A_b37	rs60783383	2.6e-08	0.22	Esophagus - Mucosa
ENSG00000116701.10	NCF2	1_183606747_C_A_b37	rs1174686	3e-08	0.22	Esophagus - Mucosa
ENSG00000116701.10	NCF2	1_183584462_TGC_T_b37	rs60704058	3.1e-08	0.22	Esophagus - Mucosa
ENSG00000116701.10	NCF2	1_183654325_C_T_b37	rs1174685	3.2e-08	0.22	Esophagus - Mucosa
ENSG00000116701.10	NCF2	1_183712545_G_T_b37	rs1926829	3.2e-08	-0.39	Skin - Not Sun Exposed (Suprapubic)
ENSG00000116701.10	NCF2	1_183586265_C_T_b37	rs201591467	3.4e-08	0.45	Pituitary
ENSG00000116701.10	NCF2	1_183707595_A_C_b37	rs2491430	3.8e-08	0.22	Esophagus - Mucosa
ENSG00000116701.10	NCF2	1_183583892_A_G_b37	rs149830921	3.8e-08	-0.42	Skin - Not Sun Exposed (Suprapubic)
ENSG00000116701.10	NCF2	1_183484405_CTT_C_b37	rs140840	3.8e-08	-0.33	Skin - Sun Exposed (Lower leg)
ENSG00000116701.10	NCF2	1_183713580_CTT_C_b37	rs34691557	3.9e-08	-0.39	Skin - Not Sun Exposed (Suprapubic)
ENSG00000116701.10	NCF2	1_183517524_T_C_b37	rs116564792	4.3e-08	-0.72	Skin - Sun Exposed (Lower leg)
ENSG00000116701.10	NCF2	1_183528443_A_C_b37	rs34192123	4.3e-08	-0.72	Skin - Sun Exposed (Lower leg)
ENSG00000116701.10	NCF2	1_183466305_T_C_b37	rs12035803	5.1e-08	-0.32	Skin - Sun Exposed (Lower leg)
ENSG00000116701.10	NCF2	1_183394478_G_T_b37	rs10797882	5.5e-08	-0.37	Skin - Not Sun Exposed (Suprapubic)
ENSG00000116701.10	NCF2	1_183725852_C_G_b37	rs2491428	5.8e-08	0.22	Esophagus - Mucosa
ENSG00000116701.10	NCF2	1_183725121_C_T_b37	rs10797906	5.8e-08	-0.38	Skin - Not Sun Exposed (Suprapubic)
ENSG00000116701.10	NCF2	1_183733331_G_T_b37	rs10737248	5.8e-08	-0.38	Skin - Not Sun Exposed (Suprapubic)
ENSG00000116701.10	NCF2	1_183738142_C_A_b37	rs10797908	5.8e-08	-0.38	Skin - Not Sun Exposed (Suprapubic)
ENSG00000116701.10	NCF2	1_183738154_A_C_b37	rs10797909	5.8e-08	-0.38	Skin - Not Sun Exposed (Suprapubic)
ENSG00000116701.10	NCF2	1_183746262_G_A_b37	rs13375745	5.8e-08	-0.38	Skin - Not Sun Exposed (Suprapubic)
ENSG00000116701.10	NCF2	1_183752347_TG_T_b37	rs5779185	5.8e-08	-0.38	Skin - Not Sun Exposed (Suprapubic)
ENSG00000116701.10	NCF2	1_183358169_T_C_b37	rs12410472	6.1e-08	-0.42	Skin - Not Sun Exposed (Suprapubic)
ENSG00000116701.10	NCF2	1_183375454_G_A_b37	rs10752911	6.1e-08	-0.42	Skin - Not Sun Exposed (Suprapubic)
ENSG00000116701.10	NCF2	1_183376810_T_A_b37	rs10797880	6.1e-08	-0.42	Skin - Not Sun Exposed (Suprapubic)
ENSG00000116701.10	NCF2	1_183381795_G_A_b37	rs11577151	6.1e-08	-0.42	Skin - Not Sun Exposed (Suprapubic)
ENSG00000116701.10	NCF2	1_183586240_A_T_b37	rs114063887	6.2e-08	0.45	Pituitary
ENSG00000116701.10	NCF2	1_183379362_G_A_b37	rs12402878	7.5e-08	-0.43	Skin - Not Sun Exposed (Suprapubic)
ENSG00000116701.10	NCF2	1_183715906_G_T_b37	rs12064656	7.5e-08	-0.37	Skin - Not Sun Exposed (Suprapubic)
ENSG00000116701.10	NCF2	1_183558437_G_A_b37	rs35550074	8.1e-08	-0.15	Adipose - Subcutaneous
ENSG00000116701.10	NCF2	1_183732549_A_C_b37	rs6677040	9.6e-08	-0.38	Skin - Not Sun Exposed (Suprapubic)
ENSG00000116701.10	NCF2	1_183442324_A_C_b37	rs78517564	9.9e-08	-0.32	Skin - Sun Exposed (Lower leg)
ENSG00000116701.10	NCF2	1_183468420_T_G_b37	rs10911346	9.9e-08	-0.32	Skin - Sun Exposed (Lower leg)
ENSG00000116701.10	NCF2	1_183558438_A_G_b37	rs35423398	1e-07	-0.41	Nerve - Tibial
ENSG00000116701.10	NCF2	1_183561517_T_C_b37	rs10911367	1.1e-07	-0.14	Adipose - Subcutaneous
ENSG00000116701.10	NCF2	1_183563840_C_T_b37	rs11580439	1.1e-07	-0.33	Esophagus - Mucosa
ENSG00000116701.10	NCF2	1_183586973_G_C_b37	rs2761571	1.1e-07	0.44	Pituitary
ENSG00000116701.10	NCF2	1_183690467_G_A_b37	rs10494566	1.1e-07	-0.38	Skin - Not Sun Exposed (Suprapubic)
ENSG00000116701.10	NCF2	1_183750896_A_T_b37	rs10911434	1.2e-07	-0.38	Skin - Not Sun Exposed (Suprapubic)
ENSG00000116701.10	NCF2	1_183587440_C_T_b37	rs2478761	1.2e-07	0.44	Pituitary
ENSG00000116701.10	NCF2	1_183396066_G_A_b37	rs12032353	1.3e-07	-0.3	Skin - Sun Exposed (Lower leg)
ENSG00000116701.10	NCF2	1_183745579_G_C_b37	rs10157939	1.3e-07	-0.38	Skin - Not Sun Exposed (Suprapubic)
ENSG00000116701.10	NCF2	1_183402200_C_T_b37	rs150806476	1.3e-07	-0.36	Skin - Not Sun Exposed (Suprapubic)
ENSG00000116701.10	NCF2	1_183585119_A_G_b37	rs12746458	1.4e-07	-0.22	Esophagus - Mucosa
ENSG00000116701.10	NCF2	1_183399624_G_A_b37	rs11805957	1.4e-07	-0.37	Skin - Not Sun Exposed (Suprapubic)
ENSG00000116701.10	NCF2	1_183295069_G_T_b37	rs12045638	1.5e-07	-0.43	Skin - Not Sun Exposed (Suprapubic)
ENSG00000116701.10	NCF2	1_183327971_C_T_b37	rs10494562	1.5e-07	-0.43	Skin - Not Sun Exposed (Suprapubic)
ENSG00000116701.10	NCF2	1_183379958_T_C_b37	rs10911329	1.5e-07	-0.36	Skin - Sun Exposed (Lower leg)
ENSG00000116701.10	NCF2	1_183591847_T_A_b37	rs2862067	2.1e-07	0.21	Esophagus - Mucosa
ENSG00000116701.10	NCF2	1_183591031_A_G_b37	rs4651154	2.3e-07	0.21	Esophagus - Mucosa
ENSG00000116701.10	NCF2	1_183615554_T_TTA_b37	rs148078350	2.4e-07	0.22	Esophagus - Mucosa
ENSG00000116701.10	NCF2	1_183396066_G_A_b37	rs12032353	2.6e-07	-0.34	Skin - Not Sun Exposed (Suprapubic)
ENSG00000116701.10	NCF2	1_183548643_C_T_b37	rs3929721	2.7e-07	-0.3	Skin - Sun Exposed (Lower leg)
ENSG00000116701.10	NCF2	1_183563520_G_C_b37	rs80008821	2.7e-07	0.4	Skin - Sun Exposed (Lower leg)
ENSG00000116701.10	NCF2	1_183348393_G_A_b37	rs116825143	2.7e-07	-0.35	Skin - Sun Exposed (Lower leg)
ENSG00000116701.10	NCF2	1_183759203_C_A_b37	rs71632195	2.8e-07	0.59	Nerve - Tibial
ENSG00000116701.10	NCF2	1_183598350_A_T_b37	rs4652822	3e-07	0.21	Esophagus - Mucosa
ENSG00000116701.10	NCF2	1_183666920_G_A_b37	rs4507976	3.1e-07	-0.19	Esophagus - Mucosa
ENSG00000116701.10	NCF2	1_183556291_A_G_b37	rs789192	3.2e-07	-0.14	Adipose - Subcutaneous
ENSG00000116701.10	NCF2	1_183275147_G_A_b37	rs60404994	3.2e-07	-0.43	Skin - Not Sun Exposed (Suprapubic)
ENSG00000116701.10	NCF2	1_183558423_G_A_b37	rs35667872	3.3e-07	-0.39	Nerve - Tibial
ENSG00000116701.10	NCF2	1_183584755_T_C_b37		3.4e-07	0.76	Artery - Tibial
ENSG00000116701.10	NCF2	1_183584753_G_A_b37	rs574424023	3.4e-07	0.76	Artery - Tibial
ENSG00000116701.10	NCF2	1_183593512_G_A_b37	rs4084535	3.4e-07	0.21	Esophagus - Mucosa
ENSG00000116701.10	NCF2	1_183562517_A_C_b37	rs3754517	3.6e-07	-0.14	Adipose - Subcutaneous
ENSG00000116701.10	NCF2	1_183562603_T_C_b37	rs3754516	3.6e-07	-0.14	Adipose - Subcutaneous
ENSG00000116701.10	NCF2	1_183558174_T_C_b37	rs12094036	3.6e-07	-0.39	Nerve - Tibial
ENSG00000116701.10	NCF2	1_183558357_A_G_b37	rs34459587	3.6e-07	-0.39	Nerve - Tibial
ENSG00000116701.10	NCF2	1_183559105_G_A_b37	rs10911365	3.6e-07	-0.39	Nerve - Tibial
ENSG00000116701.10	NCF2	1_183562264_A_AAGTCTTAGCACCTCAGAT_b37	rs369465356	3.8e-07	-0.14	Adipose - Subcutaneous
ENSG00000116701.10	NCF2	1_183550475_A_C_b37	rs35734725	3.9e-07	0.29	Artery - Tibial
ENSG00000116701.10	NCF2	1_183582765_A_G_b37	rs61811180	4e-07	0.42	Pituitary
ENSG00000116701.10	NCF2	1_183583021_T_C_b37	rs111610865	4e-07	0.42	Pituitary
ENSG00000116701.10	NCF2	1_183583937_A_C_b37	rs75705092	4e-07	0.42	Pituitary
ENSG00000116701.10	NCF2	1_183583950_C_T_b37	rs78070601	4e-07	0.42	Pituitary
ENSG00000116701.10	NCF2	1_183584067_TTC_T_b37	rs113152065	4e-07	0.42	Pituitary
ENSG00000116701.10	NCF2	1_183584159_G_A_b37	rs12062320	4e-07	0.42	Pituitary
ENSG00000116701.10	NCF2	1_183584285_G_A_b37	rs12062368	4e-07	0.42	Pituitary
ENSG00000116701.10	NCF2	1_183583992_C_T_b37	rs75940660	4e-07	0.42	Pituitary
ENSG00000116701.10	NCF2	1_183583993_A_G_b37	rs75435975	4e-07	0.42	Pituitary
ENSG00000116701.10	NCF2	1_183572818_T_C_b37	rs76210171	4e-07	-0.53	Artery - Tibial
ENSG00000116701.10	NCF2	1_183554449_T_C_b37	rs699240	4.1e-07	-0.14	Adipose - Subcutaneous
ENSG00000116701.10	NCF2	1_183582830_G_A_b37	rs61811181	4.2e-07	0.42	Pituitary
ENSG00000116701.10	NCF2	1_183595069_C_G_b37	rs3856127	4.2e-07	0.21	Esophagus - Mucosa
ENSG00000116701.10	NCF2	1_183268483_C_T_b37	rs147885904	4.3e-07	-0.38	Skin - Not Sun Exposed (Suprapubic)
ENSG00000116701.10	NCF2	1_183583101_A_G_b37	rs74755153	4.3e-07	0.42	Pituitary
ENSG00000116701.10	NCF2	1_183583107_G_T_b37	rs62031859	4.3e-07	0.42	Pituitary
ENSG00000116701.10	NCF2	1_183650701_G_A_b37	rs1174684	4.4e-07	0.29	Skin - Sun Exposed (Lower leg)
ENSG00000116701.10	NCF2	1_183717696_A_G_b37	rs11805639	4.4e-07	-0.36	Skin - Not Sun Exposed (Suprapubic)
ENSG00000116701.10	NCF2	1_183562782_C_A_b37	rs3754515	4.4e-07	-0.14	Adipose - Subcutaneous
ENSG00000116701.10	NCF2	1_183562833_C_T_b37	rs3754514	4.4e-07	-0.14	Adipose - Subcutaneous
ENSG00000116701.10	NCF2	1_183562888_A_G_b37	rs7533521	4.4e-07	-0.14	Adipose - Subcutaneous
ENSG00000116701.10	NCF2	1_183563457_C_T_b37	rs10797889	4.5e-07	-0.14	Adipose - Subcutaneous
ENSG00000116701.10	NCF2	1_183583150_C_G_b37	rs75815911	4.7e-07	0.42	Pituitary
ENSG00000116701.10	NCF2	1_183679912_C_T_b37	rs12746073	4.8e-07	-0.19	Esophagus - Mucosa
ENSG00000116701.10	NCF2	1_183684569_G_A_b37	rs17559937	4.9e-07	-0.19	Esophagus - Mucosa
ENSG00000116701.10	NCF2	1_183650428_G_A_b37	rs1174683	4.9e-07	0.3	Skin - Sun Exposed (Lower leg)
ENSG00000116701.10	NCF2	1_183584354_C_T_b37	rs12082958	5e-07	0.42	Pituitary
ENSG00000116701.10	NCF2	1_183282673_GGTGCAA_G_b37	rs147712753	5.1e-07	-0.4	Skin - Not Sun Exposed (Suprapubic)
ENSG00000116701.10	NCF2	1_183289710_C_T_b37	rs10911307	5.1e-07	-0.4	Skin - Not Sun Exposed (Suprapubic)
ENSG00000116701.10	NCF2	1_183299974_A_G_b37	rs16860810	5.1e-07	-0.4	Skin - Not Sun Exposed (Suprapubic)
ENSG00000116701.10	NCF2	1_183303443_C_A_b37	rs12034392	5.1e-07	-0.4	Skin - Not Sun Exposed (Suprapubic)
ENSG00000116701.10	NCF2	1_183303467_G_T_b37	rs12048443	5.1e-07	-0.4	Skin - Not Sun Exposed (Suprapubic)
ENSG00000116701.10	NCF2	1_183560192_C_T_b37	rs4987080	5.1e-07	-0.38	Nerve - Tibial
ENSG00000116701.10	NCF2	1_183586313_C_T_b37	rs200835529	5.1e-07	0.42	Pituitary
ENSG00000116701.10	NCF2	1_183277081_G_A_b37	rs869741	5.2e-07	-0.41	Skin - Not Sun Exposed (Suprapubic)
ENSG00000116701.10	NCF2	1_183559704_A_C_b37	rs2274065	5.6e-07	-0.38	Nerve - Tibial
ENSG00000116701.10	NCF2	1_183559861_T_C_b37	rs2333681	5.6e-07	-0.38	Nerve - Tibial
ENSG00000116701.10	NCF2	1_183561285_T_C_b37	rs10911366	5.6e-07	-0.38	Nerve - Tibial
ENSG00000116701.10	NCF2	1_183561441_T_G_b37	rs12057355	5.6e-07	-0.38	Nerve - Tibial
ENSG00000116701.10	NCF2	1_183561518_G_C_b37	rs12086606	5.6e-07	-0.38	Nerve - Tibial
ENSG00000116701.10	NCF2	1_183561524_T_C_b37	rs12091848	5.6e-07	-0.38	Nerve - Tibial
ENSG00000116701.10	NCF2	1_183300170_C_T_b37	rs952447	5.6e-07	-0.4	Skin - Not Sun Exposed (Suprapubic)
ENSG00000116701.10	NCF2	1_183562932_C_T_b37	rs7556061	5.8e-07	-0.14	Adipose - Subcutaneous
ENSG00000116701.10	NCF2	1_183625210_A_G_b37	rs1174662	6e-07	0.2	Esophagus - Mucosa
ENSG00000116701.10	NCF2	1_183379362_G_A_b37	rs12402878	6e-07	-0.34	Skin - Sun Exposed (Lower leg)
ENSG00000116701.10	NCF2	1_183601331_C_T_b37	rs17436125	6e-07	0.2	Esophagus - Mucosa
ENSG00000116701.10	NCF2	1_183357428_G_GA_b37	rs150652301	6.2e-07	-0.34	Skin - Sun Exposed (Lower leg)
ENSG00000116701.10	NCF2	1_183715906_G_T_b37	rs12064656	6.4e-07	-0.29	Skin - Sun Exposed (Lower leg)
ENSG00000116701.10	NCF2	1_183604152_C_G_b37	rs61811187	6.6e-07	0.2	Esophagus - Mucosa
ENSG00000116701.10	NCF2	1_183573228_G_A_b37	rs2767314	6.9e-07	0.41	Pituitary
ENSG00000116701.10	NCF2	1_183576236_C_G_b37	rs2767306	6.9e-07	0.41	Pituitary
ENSG00000116701.10	NCF2	1_183570909_C_T_b37	rs78977742	7.3e-07	-0.52	Artery - Tibial
ENSG00000116701.10	NCF2	1_183582249_A_G_b37	rs2767316	7.5e-07	0.42	Pituitary
ENSG00000116701.10	NCF2	1_183381795_G_A_b37	rs11577151	7.7e-07	-0.33	Skin - Sun Exposed (Lower leg)
ENSG00000116701.10	NCF2	1_183579911_A_G_b37	rs2767312	7.8e-07	0.42	Pituitary
ENSG00000116701.10	NCF2	1_183677511_C_T_b37	rs10911420	7.9e-07	-0.19	Esophagus - Mucosa
ENSG00000116701.10	NCF2	1_183579379_G_A_b37	rs2761556	7.9e-07	0.42	Pituitary
ENSG00000116701.10	NCF2	1_183579585_T_A_b37	rs2767311	7.9e-07	0.42	Pituitary
ENSG00000116701.10	NCF2	1_183579726_TG_T_b37	rs796140731	7.9e-07	0.42	Pituitary
ENSG00000116701.10	NCF2	1_183579729_G_T_b37	rs34840421	7.9e-07	0.42	Pituitary
ENSG00000116701.10	NCF2	1_183579973_C_T_b37	rs2761558	7.9e-07	0.42	Pituitary
ENSG00000116701.10	NCF2	1_183580279_C_T_b37	rs2761559	7.9e-07	0.42	Pituitary
ENSG00000116701.10	NCF2	1_183580370_G_A_b37	rs2761560	7.9e-07	0.42	Pituitary
ENSG00000116701.10	NCF2	1_183580653_G_C_b37	rs2761561	7.9e-07	0.42	Pituitary
ENSG00000116701.10	NCF2	1_183581402_C_T_b37	rs2761565	7.9e-07	0.42	Pituitary
ENSG00000116701.10	NCF2	1_183581755_G_A_b37	rs2761566	7.9e-07	0.42	Pituitary
ENSG00000116701.10	NCF2	1_183582172_T_C_b37	rs2767315	7.9e-07	0.42	Pituitary
ENSG00000116701.10	NCF2	1_183580427_C_T_b37	rs2767313	8.2e-07	0.42	Pituitary
ENSG00000116701.10	NCF2	1_183582098_T_C_b37	rs10911375	8.2e-07	-0.48	Artery - Tibial
ENSG00000116701.10	NCF2	1_183581960_A_G_b37	rs2761568	8.3e-07	0.42	Pituitary
ENSG00000116701.10	NCF2	1_183549757_G_T_b37	rs10911363	8.7e-07	0.26	Artery - Tibial
ENSG00000116701.10	NCF2	1_183152541_A_G_b37	rs116328018	8.7e-07	-0.52	Skin - Sun Exposed (Lower leg)
ENSG00000116701.10	NCF2	1_183579492_T_TGGCA_b37	rs370739859	8.8e-07	-0.48	Artery - Tibial
ENSG00000116701.10	NCF2	1_183560761_A_G_b37	rs2333682	8.9e-07	-0.38	Nerve - Tibial
ENSG00000116701.10	NCF2	1_183572486_T_C_b37	rs10081971	9e-07	-0.51	Artery - Tibial
ENSG00000116701.10	NCF2	1_183014289_G_A_b37	rs6660111	9e-07	-0.24	Skin - Not Sun Exposed (Suprapubic)
ENSG00000116701.10	NCF2	1_183087727_A_G_b37	rs10797848	9.2e-07	-0.22	Skin - Not Sun Exposed (Suprapubic)
ENSG00000116701.10	NCF2	1_183592570_C_T_b37	rs17488675	9.6e-07	0.2	Esophagus - Mucosa
ENSG00000116701.10	NCF2	1_183583164_C_T_b37	rs377482073	9.6e-07	0.41	Pituitary
ENSG00000116701.10	NCF2	1_183581914_A_G_b37	rs12069669	1e-06	-0.47	Artery - Tibial
ENSG00000116701.10	NCF2	1_183582431_C_T_b37	rs10911376	1e-06	-0.47	Artery - Tibial
ENSG00000116701.10	NCF2	1_183547032_T_C_b37	rs10797888	1e-06	-0.29	Skin - Sun Exposed (Lower leg)
ENSG00000116701.10	NCF2	1_183641356_T_C_b37	rs1174676	1e-06	0.33	Skin - Not Sun Exposed (Suprapubic)
ENSG00000116701.10	NCF2	1_183276903_G_T_b37	rs869740	1e-06	-0.4	Skin - Not Sun Exposed (Suprapubic)
ENSG00000116701.10	NCF2	1_183679912_C_T_b37	rs12746073	1.1e-06	0.13	Adipose - Visceral (Omentum)
ENSG00000116701.10	NCF2	1_183481102_C_A_b37	rs77960299	1.1e-06	-0.26	Skin - Sun Exposed (Lower leg)
ENSG00000116701.10	NCF2	1_183597537_C_T_b37	rs10911382	1.1e-06	-0.47	Artery - Tibial
ENSG00000116701.10	NCF2	1_183745579_G_C_b37	rs10157939	1.2e-06	-0.28	Skin - Sun Exposed (Lower leg)
ENSG00000116701.10	NCF2	1_183750896_A_T_b37	rs10911434	1.2e-06	-0.28	Skin - Sun Exposed (Lower leg)
ENSG00000116701.10	NCF2	1_183581037_T_G_b37	rs10911374	1.2e-06	-0.46	Artery - Tibial
ENSG00000116701.10	NCF2	1_182970524_T_C_b37	rs4651134	1.2e-06	-0.21	Skin - Not Sun Exposed (Suprapubic)
ENSG00000116701.10	NCF2	1_183564287_C_T_b37	rs10911368	1.3e-06	-0.13	Adipose - Subcutaneous
ENSG00000116701.10	NCF2	1_183581038_G_T_b37	rs2476571	1.3e-06	0.41	Pituitary
ENSG00000116701.10	NCF2	1_183358169_T_C_b37	rs12410472	1.3e-06	-0.32	Skin - Sun Exposed (Lower leg)
ENSG00000116701.10	NCF2	1_183375454_G_A_b37	rs10752911	1.3e-06	-0.32	Skin - Sun Exposed (Lower leg)
ENSG00000116701.10	NCF2	1_183376810_T_A_b37	rs10797880	1.3e-06	-0.32	Skin - Sun Exposed (Lower leg)
ENSG00000116701.10	NCF2	1_183563808_A_G_b37	rs10797891	1.3e-06	-0.13	Adipose - Subcutaneous
ENSG00000116701.10	NCF2	1_183718836_G_A_b37	rs6671911	1.3e-06	-0.28	Skin - Sun Exposed (Lower leg)
ENSG00000116701.10	NCF2	1_183563709_C_T_b37	rs10797890	1.4e-06	-0.13	Adipose - Subcutaneous
ENSG00000116701.10	NCF2	1_183558423_G_A_b37	rs35667872	1.4e-06	-0.28	Esophagus - Mucosa
ENSG00000116701.10	NCF2	1_183725820_T_C_b37	rs12130615	1.4e-06	0.17	Adipose - Subcutaneous
ENSG00000116701.10	NCF2	1_183575927_TAGCACTTTGGGAGGCTGTAATCTC_T_b37	rs373084731	1.4e-06	0.2	Esophagus - Mucosa
ENSG00000116701.10	NCF2	1_183382908_A_AT_b37	rs35058416	1.5e-06	-0.33	Skin - Sun Exposed (Lower leg)
ENSG00000116701.10	NCF2	1_182970698_T_C_b37	rs4651136	1.5e-06	-0.21	Skin - Not Sun Exposed (Suprapubic)
ENSG00000116701.10	NCF2	1_183415188_C_T_b37	rs17558314	1.5e-06	-0.25	Artery - Tibial
ENSG00000116701.10	NCF2	1_183563833_A_G_b37	rs10797892	1.5e-06	-0.13	Adipose - Subcutaneous
ENSG00000116701.10	NCF2	1_183701475_A_C_b37	rs10911425	1.6e-06	0.17	Adipose - Subcutaneous
ENSG00000116701.10	NCF2	1_183711823_G_A_b37	rs12401632	1.6e-06	-0.38	Skin - Not Sun Exposed (Suprapubic)
ENSG00000116701.10	NCF2	1_183684569_G_A_b37	rs17559937	1.6e-06	0.13	Adipose - Visceral (Omentum)
ENSG00000116701.10	NCF2	1_183584735_C_G_b37	rs28812191	1.7e-06	-0.45	Artery - Tibial
ENSG00000116701.10	NCF2	1_183667957_C_G_b37	rs6424902	1.7e-06	-0.19	Esophagus - Mucosa
ENSG00000116701.10	NCF2	1_183668132_A_G_b37	rs6424904	1.7e-06	-0.19	Esophagus - Mucosa
ENSG00000116701.10	NCF2	1_182967471_G_GGCAAA_b37	rs56099433	1.7e-06	-0.21	Skin - Not Sun Exposed (Suprapubic)
ENSG00000116701.10	NCF2	1_183667375_A_C_b37	rs10911417	1.7e-06	-0.28	Skin - Sun Exposed (Lower leg)
ENSG00000116701.10	NCF2	1_183667908_T_C_b37	rs10494565	1.7e-06	-0.28	Skin - Sun Exposed (Lower leg)
ENSG00000116701.10	NCF2	1_183671821_C_T_b37	rs12092963	1.7e-06	-0.28	Skin - Sun Exposed (Lower leg)
ENSG00000116701.10	NCF2	1_183674209_C_T_b37	rs12096023	1.7e-06	-0.28	Skin - Sun Exposed (Lower leg)
ENSG00000116701.10	NCF2	1_183675931_G_A_b37	rs10911419	1.7e-06	-0.28	Skin - Sun Exposed (Lower leg)
ENSG00000116701.10	NCF2	1_183685414_A_G_b37	rs16861502	1.7e-06	-0.28	Skin - Sun Exposed (Lower leg)
ENSG00000116701.10	NCF2	1_183693410_A_G_b37	rs6681332	1.7e-06	-0.28	Skin - Sun Exposed (Lower leg)
ENSG00000116701.10	NCF2	1_183694212_T_C_b37	rs6673065	1.7e-06	-0.28	Skin - Sun Exposed (Lower leg)
ENSG00000116701.10	NCF2	1_183694248_G_A_b37	rs6660434	1.7e-06	-0.28	Skin - Sun Exposed (Lower leg)
ENSG00000116701.10	NCF2	1_183700018_T_C_b37	rs10494567	1.7e-06	-0.28	Skin - Sun Exposed (Lower leg)
ENSG00000116701.10	NCF2	1_183563808_A_G_b37	rs10797891	1.7e-06	0.4	Pituitary
ENSG00000116701.10	NCF2	1_183563833_A_G_b37	rs10797892	1.7e-06	0.4	Pituitary
ENSG00000116701.10	NCF2	1_183736952_G_A_b37	rs77461455	1.8e-06	-0.27	Skin - Sun Exposed (Lower leg)
ENSG00000116701.10	NCF2	1_183749506_G_A_b37	rs2148623	1.8e-06	-0.27	Skin - Sun Exposed (Lower leg)
ENSG00000116701.10	NCF2	1_183555370_A_G_b37	rs35049461	1.8e-06	-0.13	Adipose - Subcutaneous
ENSG00000116701.10	NCF2	1_183555373_C_G_b37	rs34715440	1.8e-06	-0.13	Adipose - Subcutaneous
ENSG00000116701.10	NCF2	1_183563709_C_T_b37	rs10797890	1.8e-06	0.4	Pituitary
ENSG00000116701.10	NCF2	1_183581914_A_G_b37	rs12069669	1.8e-06	-0.41	Nerve - Tibial
ENSG00000116701.10	NCF2	1_183582431_C_T_b37	rs10911376	1.8e-06	-0.41	Nerve - Tibial
ENSG00000116701.10	NCF2	1_183668030_T_C_b37	rs6424903	1.8e-06	-0.19	Esophagus - Mucosa
ENSG00000116701.10	NCF2	1_183668033_C_T_b37	rs6704283	1.8e-06	-0.19	Esophagus - Mucosa
ENSG00000116701.10	NCF2	1_183558174_T_C_b37	rs12094036	1.8e-06	-0.27	Esophagus - Mucosa
ENSG00000116701.10	NCF2	1_183558357_A_G_b37	rs34459587	1.8e-06	-0.27	Esophagus - Mucosa
ENSG00000116701.10	NCF2	1_183559105_G_A_b37	rs10911365	1.8e-06	-0.27	Esophagus - Mucosa
ENSG00000116701.10	NCF2	1_183561517_T_C_b37	rs10911367	1.9e-06	0.4	Pituitary
ENSG00000116701.10	NCF2	1_183303443_C_A_b37	rs12034392	1.9e-06	-0.33	Skin - Sun Exposed (Lower leg)
ENSG00000116701.10	NCF2	1_183441991_G_A_b37	rs6671819	2e-06	-0.26	Skin - Sun Exposed (Lower leg)
ENSG00000116701.10	NCF2	1_183467572_G_A_b37	rs12405633	2e-06	-0.26	Skin - Sun Exposed (Lower leg)
ENSG00000116701.10	NCF2	1_183482785_G_A_b37	rs143885630	2e-06	-0.26	Skin - Sun Exposed (Lower leg)
ENSG00000116701.10	NCF2	1_183580827_G_A_b37	rs2761563	2e-06	0.41	Pituitary
ENSG00000116701.10	NCF2	1_183473439_G_A_b37	rs10911352	2e-06	-0.26	Skin - Sun Exposed (Lower leg)
ENSG00000116701.10	NCF2	1_183562517_A_C_b37	rs3754517	2.1e-06	0.4	Pituitary
ENSG00000116701.10	NCF2	1_183562603_T_C_b37	rs3754516	2.1e-06	0.4	Pituitary
ENSG00000116701.10	NCF2	1_183562782_C_A_b37	rs3754515	2.1e-06	0.4	Pituitary
ENSG00000116701.10	NCF2	1_183562833_C_T_b37	rs3754514	2.1e-06	0.4	Pituitary
ENSG00000116701.10	NCF2	1_183562888_A_G_b37	rs7533521	2.1e-06	0.4	Pituitary
ENSG00000116701.10	NCF2	1_183563457_C_T_b37	rs10797889	2.1e-06	0.4	Pituitary
ENSG00000116701.10	NCF2	1_183564287_C_T_b37	rs10911368	2.1e-06	0.4	Pituitary
ENSG00000116701.10	NCF2	1_183564301_G_C_b37	rs3903838	2.1e-06	0.4	Pituitary
ENSG00000116701.10	NCF2	1_183703612_C_T_b37	rs12075254	2.1e-06	-0.28	Skin - Sun Exposed (Lower leg)
ENSG00000116701.10	NCF2	1_183556620_T_C_b37	rs3903837	2.1e-06	-0.13	Adipose - Subcutaneous
ENSG00000116701.10	NCF2	1_183562264_A_AAGTCTTAGCACCTCAGAT_b37	rs369465356	2.1e-06	0.4	Pituitary
ENSG00000116701.10	NCF2	1_183581037_T_G_b37	rs10911374	2.1e-06	-0.41	Nerve - Tibial
ENSG00000116701.10	NCF2	1_183667100_A_G_b37	rs4638079	2.2e-06	-0.19	Esophagus - Mucosa
ENSG00000116701.10	NCF2	1_183556291_A_G_b37	rs789192	2.2e-06	0.41	Pituitary
ENSG00000116701.10	NCF2	1_183464292_A_G_b37	rs10797884	2.2e-06	-0.26	Skin - Sun Exposed (Lower leg)
ENSG00000116701.10	NCF2	1_183454188_A_G_b37	rs10911342	2.3e-06	-0.26	Skin - Sun Exposed (Lower leg)
ENSG00000116701.10	NCF2	1_183693046_T_G_b37	rs7524241	2.3e-06	0.13	Adipose - Visceral (Omentum)
ENSG00000116701.10	NCF2	1_183579492_T_TGGCA_b37	rs370739859	2.3e-06	-0.41	Nerve - Tibial
ENSG00000116701.10	NCF2	1_183584755_T_C_b37		2.3e-06	0.66	Nerve - Tibial
ENSG00000116701.10	NCF2	1_183563927_CT_C_b37	rs75499535	2.4e-06	0.41	Pituitary
ENSG00000116701.10	NCF2	1_183456019_G_A_b37	rs10911343	2.4e-06	-0.26	Skin - Sun Exposed (Lower leg)
ENSG00000116701.10	NCF2	1_183407953_A_G_b37	rs3965889	2.4e-06	-0.24	Artery - Tibial
ENSG00000116701.10	NCF2	1_183088988_A_G_b37	rs10797849	2.4e-06	-0.21	Skin - Not Sun Exposed (Suprapubic)
ENSG00000116701.10	NCF2	1_183090011_G_A_b37	rs3768622	2.4e-06	-0.21	Skin - Not Sun Exposed (Suprapubic)
ENSG00000116701.10	NCF2	1_183555370_A_G_b37	rs35049461	2.4e-06	-0.18	Skin - Sun Exposed (Lower leg)
ENSG00000116701.10	NCF2	1_183555373_C_G_b37	rs34715440	2.4e-06	-0.18	Skin - Sun Exposed (Lower leg)
ENSG00000116701.10	NCF2	1_183582098_T_C_b37	rs10911375	2.4e-06	-0.41	Nerve - Tibial
ENSG00000116701.10	NCF2	1_183584753_G_A_b37	rs574424023	2.4e-06	0.66	Nerve - Tibial
ENSG00000116701.10	NCF2	1_183666920_G_A_b37	rs4507976	2.4e-06	0.13	Adipose - Visceral (Omentum)
ENSG00000116701.10	NCF2	1_183669720_A_G_b37	rs12138213	2.5e-06	0.17	Muscle - Skeletal
ENSG00000116701.10	NCF2	1_183564301_G_C_b37	rs3903838	2.5e-06	-0.13	Adipose - Subcutaneous
ENSG00000116701.10	NCF2	1_183556620_T_C_b37	rs3903837	2.5e-06	-0.18	Skin - Sun Exposed (Lower leg)
ENSG00000116701.10	NCF2	1_182998486_A_T_b37	rs10797816	2.5e-06	-0.21	Skin - Not Sun Exposed (Suprapubic)
ENSG00000116701.10	NCF2	1_183583916_C_G_b37	rs77466579	2.5e-06	-0.41	Nerve - Tibial
ENSG00000116701.10	NCF2	1_183715525_G_A_b37	rs2182594	2.6e-06	0.13	Adipose - Visceral (Omentum)
ENSG00000116701.10	NCF2	1_183677332_T_C_b37	rs60771493	2.6e-06	0.17	Muscle - Skeletal
ENSG00000116701.10	NCF2	1_183677613_A_G_b37	rs2182596	2.6e-06	0.17	Muscle - Skeletal
ENSG00000116701.10	NCF2	1_183677873_C_G_b37	rs2182597	2.6e-06	0.17	Muscle - Skeletal
ENSG00000116701.10	NCF2	1_183413886_G_A_b37	rs12039578	2.6e-06	-0.24	Artery - Tibial
ENSG00000116701.10	NCF2	1_183563381_A_AAAACACT_b37	rs77463392	2.6e-06	0.18	Esophagus - Mucosa
ENSG00000116701.10	NCF2	1_183609654_A_G_b37	rs1174687	2.6e-06	0.41	Pituitary
ENSG00000116701.10	NCF2	1_183087680_G_A_b37	rs10797847	2.7e-06	-0.21	Skin - Not Sun Exposed (Suprapubic)
ENSG00000116701.10	NCF2	1_183712545_G_T_b37	rs1926829	2.7e-06	-0.28	Skin - Sun Exposed (Lower leg)
ENSG00000116701.10	NCF2	1_183554449_T_C_b37	rs699240	2.8e-06	0.4	Pituitary
ENSG00000116701.10	NCF2	1_183515428_G_A_b37	rs2298083	2.8e-06	-0.26	Skin - Sun Exposed (Lower leg)
ENSG00000116701.10	NCF2	1_183521510_ATTATTC_A_b37	rs71792397	2.8e-06	-0.26	Skin - Sun Exposed (Lower leg)
ENSG00000116701.10	NCF2	1_183502233_AT_A_b37	rs796659101	2.9e-06	-0.25	Skin - Sun Exposed (Lower leg)
ENSG00000116701.10	NCF2	1_183300170_C_T_b37	rs952447	2.9e-06	-0.32	Skin - Sun Exposed (Lower leg)
ENSG00000116701.10	NCF2	1_183700152_A_G_b37	rs4087609	2.9e-06	0.13	Adipose - Visceral (Omentum)
ENSG00000116701.10	NCF2	1_183688777_C_A_b37	rs2004077	3e-06	0.13	Adipose - Visceral (Omentum)
ENSG00000116701.10	NCF2	1_183694787_T_A_b37	rs2148620	3e-06	0.13	Adipose - Visceral (Omentum)
ENSG00000116701.10	NCF2	1_183661032_A_G_b37	rs2182595	3e-06	-0.34	Cells - Transformed fibroblasts
ENSG00000116701.10	NCF2	1_183282673_GGTGCAA_G_b37	rs147712753	3e-06	-0.32	Skin - Sun Exposed (Lower leg)
ENSG00000116701.10	NCF2	1_183289710_C_T_b37	rs10911307	3e-06	-0.32	Skin - Sun Exposed (Lower leg)
ENSG00000116701.10	NCF2	1_183295069_G_T_b37	rs12045638	3e-06	-0.32	Skin - Sun Exposed (Lower leg)
ENSG00000116701.10	NCF2	1_183299974_A_G_b37	rs16860810	3e-06	-0.32	Skin - Sun Exposed (Lower leg)
ENSG00000116701.10	NCF2	1_183303467_G_T_b37	rs12048443	3e-06	-0.32	Skin - Sun Exposed (Lower leg)
ENSG00000116701.10	NCF2	1_183327971_C_T_b37	rs10494562	3e-06	-0.32	Skin - Sun Exposed (Lower leg)
ENSG00000116701.10	NCF2	1_183555779_C_T_b37	rs11578964	3.1e-06	-0.13	Adipose - Subcutaneous
ENSG00000116701.10	NCF2	1_183415589_G_A_b37	rs11808408	3.1e-06	-0.24	Artery - Tibial
ENSG00000116701.10	NCF2	1_183524638_G_GTGTT_b37	rs2308167	3.1e-06	-0.25	Skin - Sun Exposed (Lower leg)
ENSG00000116701.10	NCF2	1_183573894_C_T_b37	rs75043422	3.1e-06	-0.5	Artery - Tibial
ENSG00000116701.10	NCF2	1_183546061_G_A_b37	rs12753665	3.2e-06	0.24	Artery - Tibial
ENSG00000116701.10	NCF2	1_183692426_A_G_b37	rs10911421	3.2e-06	0.12	Adipose - Visceral (Omentum)
ENSG00000116701.10	NCF2	1_183692766_A_G_b37	rs7532280	3.2e-06	0.12	Adipose - Visceral (Omentum)
ENSG00000116701.10	NCF2	1_183692814_C_A_b37	rs7554816	3.2e-06	0.12	Adipose - Visceral (Omentum)
ENSG00000116701.10	NCF2	1_183693921_C_T_b37	rs1926827	3.2e-06	0.12	Adipose - Visceral (Omentum)
ENSG00000116701.10	NCF2	1_183694185_G_A_b37	rs6660412	3.2e-06	0.12	Adipose - Visceral (Omentum)
ENSG00000116701.10	NCF2	1_183515777_A_G_b37	rs789177	3.2e-06	-0.25	Skin - Sun Exposed (Lower leg)
ENSG00000116701.10	NCF2	1_183525620_A_T_b37	rs789180	3.2e-06	-0.25	Skin - Sun Exposed (Lower leg)
ENSG00000116701.10	NCF2	1_183725121_C_T_b37	rs10797906	3.2e-06	-0.27	Skin - Sun Exposed (Lower leg)
ENSG00000116701.10	NCF2	1_183697046_G_T_b37	rs7553224	3.2e-06	0.12	Adipose - Visceral (Omentum)
ENSG00000116701.10	NCF2	1_183527258_C_T_b37	rs789183	3.3e-06	-0.25	Skin - Sun Exposed (Lower leg)
ENSG00000116701.10	NCF2	1_183527990_G_C_b37	rs789184	3.3e-06	-0.25	Skin - Sun Exposed (Lower leg)
ENSG00000116701.10	NCF2	1_183405382_G_C_b37	rs10911334	3.3e-06	-0.24	Artery - Tibial
ENSG00000116701.10	NCF2	1_183713580_CTT_C_b37	rs34691557	3.3e-06	-0.27	Skin - Sun Exposed (Lower leg)
ENSG00000116701.10	NCF2	1_183560192_C_T_b37	rs4987080	3.3e-06	-0.27	Esophagus - Mucosa
ENSG00000116701.10	NCF2	1_183446104_G_A_b37	rs11802011	3.3e-06	-0.26	Skin - Sun Exposed (Lower leg)
ENSG00000116701.10	NCF2	1_183702926_G_A_b37	rs7525146	3.3e-06	0.13	Adipose - Visceral (Omentum)
ENSG00000116701.10	NCF2	1_183667369_G_A_b37	rs7553722	3.3e-06	0.17	Muscle - Skeletal
ENSG00000116701.10	NCF2	1_183558438_A_G_b37	rs35423398	3.4e-06	-0.27	Esophagus - Mucosa
ENSG00000116701.10	NCF2	1_183416374_G_T_b37	rs3856126	3.4e-06	-0.24	Artery - Tibial
ENSG00000116701.10	NCF2	1_183155399_A_G_b37	rs2276542	3.4e-06	-0.26	Skin - Sun Exposed (Lower leg)
ENSG00000116701.10	NCF2	1_183458957_A_G_b37	rs3845460	3.6e-06	-0.25	Skin - Sun Exposed (Lower leg)
ENSG00000116701.10	NCF2	1_183103551_T_C_b37	rs3768616	3.6e-06	-0.21	Skin - Not Sun Exposed (Suprapubic)
ENSG00000116701.10	NCF2	1_182988027_G_A_b37	rs12404594	3.7e-06	-0.2	Skin - Not Sun Exposed (Suprapubic)
ENSG00000116701.10	NCF2	1_183700521_G_A_b37	rs10752915	3.7e-06	0.12	Adipose - Visceral (Omentum)
ENSG00000116701.10	NCF2	1_183671399_C_G_b37	rs2148626	3.7e-06	0.17	Muscle - Skeletal
ENSG00000116701.10	NCF2	1_183559841_G_A_b37	rs12091406	3.7e-06	-0.4	Nerve - Tibial
ENSG00000116701.10	NCF2	1_183560035_G_A_b37	rs13306580	3.7e-06	-0.4	Nerve - Tibial
ENSG00000116701.10	NCF2	1_183560196_C_T_b37	rs4987079	3.7e-06	-0.4	Nerve - Tibial
ENSG00000116701.10	NCF2	1_183670800_G_A_b37	rs6663585	3.8e-06	0.17	Muscle - Skeletal
ENSG00000116701.10	NCF2	1_183670811_T_C_b37	rs6424905	3.8e-06	0.17	Muscle - Skeletal
ENSG00000116701.10	NCF2	1_183670898_C_T_b37	rs6424906	3.8e-06	0.17	Muscle - Skeletal
ENSG00000116701.10	NCF2	1_183669380_T_C_b37	rs12133984	3.8e-06	0.17	Muscle - Skeletal
ENSG00000116701.10	NCF2	1_183676791_C_G_b37	rs12117797	3.8e-06	0.17	Muscle - Skeletal
ENSG00000116701.10	NCF2	1_183667858_G_A_b37	rs6701811	3.8e-06	0.17	Muscle - Skeletal
ENSG00000116701.10	NCF2	1_183668806_G_A_b37	rs12753772	3.8e-06	0.17	Muscle - Skeletal
ENSG00000116701.10	NCF2	1_183670012_A_G_b37	rs12138300	3.8e-06	0.17	Muscle - Skeletal
ENSG00000116701.10	NCF2	1_183670529_A_G_b37	rs1926838	3.8e-06	0.17	Muscle - Skeletal
ENSG00000116701.10	NCF2	1_183670577_A_G_b37	rs1926839	3.8e-06	0.17	Muscle - Skeletal
ENSG00000116701.10	NCF2	1_183672052_T_C_b37	rs4517316	3.8e-06	0.17	Muscle - Skeletal
ENSG00000116701.10	NCF2	1_183672085_A_G_b37	rs4607832	3.8e-06	0.17	Muscle - Skeletal
ENSG00000116701.10	NCF2	1_183673327_T_C_b37	rs12729088	3.8e-06	0.17	Muscle - Skeletal
ENSG00000116701.10	NCF2	1_183674297_T_C_b37	rs6689503	3.8e-06	0.17	Muscle - Skeletal
ENSG00000116701.10	NCF2	1_183267544_A_AAGTGG_b37	rs148270014	3.9e-06	-0.25	Skin - Sun Exposed (Lower leg)
ENSG00000116701.10	NCF2	1_183558437_G_A_b37	rs35550074	3.9e-06	-0.18	Muscle - Skeletal
ENSG00000116701.10	NCF2	1_183050610_A_G_b37	rs10752894	4e-06	-0.21	Skin - Not Sun Exposed (Suprapubic)
ENSG00000116701.10	NCF2	1_183623619_G_C_b37	rs1184639	4e-06	0.32	Cells - Transformed fibroblasts
ENSG00000116701.10	NCF2	1_183425047_C_T_b37	rs7550777	4e-06	-0.24	Artery - Tibial
ENSG00000116701.10	NCF2	1_183532364_T_A_b37	rs35012521	4e-06	0.91	Artery - Tibial
ENSG00000116701.10	NCF2	1_183096774_G_A_b37	rs1413387	4e-06	-0.2	Skin - Not Sun Exposed (Suprapubic)
ENSG00000116701.10	NCF2	1_183098382_CG_C_b37	rs66907818	4e-06	-0.2	Skin - Not Sun Exposed (Suprapubic)
ENSG00000116701.10	NCF2	1_183604152_C_G_b37	rs61811187	4e-06	0.33	Cells - Transformed fibroblasts
ENSG00000116701.10	NCF2	1_183580826_T_C_b37	rs2761562	4.1e-06	-0.13	Adipose - Subcutaneous
ENSG00000116701.10	NCF2	1_183694281_C_T_b37	rs6660352	4.1e-06	0.12	Adipose - Visceral (Omentum)
ENSG00000116701.10	NCF2	1_183561441_T_G_b37	rs12057355	4.1e-06	-0.26	Esophagus - Mucosa
ENSG00000116701.10	NCF2	1_183687001_A_G_b37	rs12145081	4.1e-06	0.17	Muscle - Skeletal
ENSG00000116701.10	NCF2	1_183065406_A_G_b37	rs7525917	4.1e-06	-0.2	Skin - Not Sun Exposed (Suprapubic)
ENSG00000116701.10	NCF2	1_183684635_G_GT_b37	rs397935294	4.2e-06	0.17	Muscle - Skeletal
ENSG00000116701.10	NCF2	1_183682307_T_C_b37	rs6698736	4.2e-06	0.17	Muscle - Skeletal
ENSG00000116701.10	NCF2	1_183683749_C_G_b37	rs12119579	4.2e-06	0.17	Muscle - Skeletal
ENSG00000116701.10	NCF2	1_183025303_A_G_b37	rs10737238	4.2e-06	-0.2	Skin - Not Sun Exposed (Suprapubic)
ENSG00000116701.10	NCF2	1_182969828_C_A_b37	rs10797800	4.2e-06	-0.2	Skin - Not Sun Exposed (Suprapubic)
ENSG00000116701.10	NCF2	1_182970238_G_T_b37	rs4304541	4.2e-06	-0.2	Skin - Not Sun Exposed (Suprapubic)
ENSG00000116701.10	NCF2	1_183563927_CT_C_b37	rs75499535	4.3e-06	-0.13	Adipose - Subcutaneous
ENSG00000116701.10	NCF2	1_183559704_A_C_b37	rs2274065	4.3e-06	-0.26	Esophagus - Mucosa
ENSG00000116701.10	NCF2	1_183559861_T_C_b37	rs2333681	4.3e-06	-0.26	Esophagus - Mucosa
ENSG00000116701.10	NCF2	1_183560761_A_G_b37	rs2333682	4.3e-06	-0.26	Esophagus - Mucosa
ENSG00000116701.10	NCF2	1_183561285_T_C_b37	rs10911366	4.3e-06	-0.26	Esophagus - Mucosa
ENSG00000116701.10	NCF2	1_183562932_C_T_b37	rs7556061	4.4e-06	0.39	Pituitary
ENSG00000116701.10	NCF2	1_183698514_A_G_b37	rs1073848	4.4e-06	0.12	Adipose - Visceral (Omentum)
ENSG00000116701.10	NCF2	1_183704104_C_T_b37	rs7530552	4.6e-06	0.12	Adipose - Visceral (Omentum)
ENSG00000116701.10	NCF2	1_183605193_T_TG_b37	rs368849788	4.7e-06	-0.44	Artery - Tibial
ENSG00000116701.10	NCF2	1_183675576_C_T_b37	rs34232349	4.7e-06	0.6	Nerve - Tibial
ENSG00000116701.10	NCF2	1_183561518_G_C_b37	rs12086606	4.8e-06	-0.26	Esophagus - Mucosa
ENSG00000116701.10	NCF2	1_183561524_T_C_b37	rs12091848	4.8e-06	-0.26	Esophagus - Mucosa
ENSG00000116701.10	NCF2	1_183565740_CTACTAAAAATAG_C_b37	rs371019598	4.9e-06	-0.4	Nerve - Tibial
ENSG00000116701.10	NCF2	1_183629150_T_G_b37	rs1174667	4.9e-06	0.33	Cells - Transformed fibroblasts
ENSG00000116701.10	NCF2	1_183612717_C_T_b37	rs1174689	5e-06	0.32	Cells - Transformed fibroblasts
ENSG00000116701.10	NCF2	1_183671385_G_A_b37	rs2148625	5e-06	0.17	Muscle - Skeletal
ENSG00000116701.10	NCF2	1_183464292_A_G_b37	rs10797884	5e-06	-0.3	Skin - Not Sun Exposed (Suprapubic)
ENSG00000116701.10	NCF2	1_183745530_G_A_b37	rs12136408	5e-06	0.13	Adipose - Visceral (Omentum)
ENSG00000116701.10	NCF2	1_183284987_C_T_b37	rs10911303	5.1e-06	-0.37	Skin - Not Sun Exposed (Suprapubic)
ENSG00000116701.10	NCF2	1_183702071_G_C_b37	rs10911426	5.1e-06	0.12	Adipose - Visceral (Omentum)
ENSG00000116701.10	NCF2	1_183702455_T_A_b37	rs7536447	5.1e-06	0.12	Adipose - Visceral (Omentum)
ENSG00000116701.10	NCF2	1_183733331_G_T_b37	rs10737248	5.1e-06	-0.26	Skin - Sun Exposed (Lower leg)
ENSG00000116701.10	NCF2	1_183738142_C_A_b37	rs10797908	5.1e-06	-0.26	Skin - Sun Exposed (Lower leg)
ENSG00000116701.10	NCF2	1_183738154_A_C_b37	rs10797909	5.1e-06	-0.26	Skin - Sun Exposed (Lower leg)
ENSG00000116701.10	NCF2	1_183752347_TG_T_b37	rs5779185	5.1e-06	-0.26	Skin - Sun Exposed (Lower leg)
ENSG00000116701.10	NCF2	1_183555779_C_T_b37	rs11578964	5.1e-06	-0.18	Skin - Sun Exposed (Lower leg)
ENSG00000116701.10	NCF2	1_183725668_A_G_b37	rs12736382	5.1e-06	0.12	Adipose - Subcutaneous
ENSG00000116701.10	NCF2	1_183612828_C_T_b37	rs10911386	5.2e-06	-0.42	Artery - Tibial
ENSG00000116701.10	NCF2	1_183583960_G_A_b37	rs74862432	5.2e-06	0.4	Pituitary
ENSG00000116701.10	NCF2	1_183381277_G_A_b37	rs74613741	5.2e-06	-0.59	Skin - Sun Exposed (Lower leg)
ENSG00000116701.10	NCF2	1_183717664_T_C_b37	rs7535070	5.3e-06	0.12	Adipose - Subcutaneous
ENSG00000116701.10	NCF2	1_183426758_A_G_b37	rs4652802	5.4e-06	-0.23	Artery - Tibial
ENSG00000116701.10	NCF2	1_183725668_A_G_b37	rs12736382	5.4e-06	0.13	Adipose - Visceral (Omentum)
ENSG00000116701.10	NCF2	1_183671283_A_G_b37	rs7543703	5.6e-06	0.17	Muscle - Skeletal
ENSG00000116701.10	NCF2	1_183583873_C_A_b37	rs140156940	5.7e-06	-0.4	Nerve - Tibial
ENSG00000116701.10	NCF2	1_183556291_A_G_b37	rs789192	5.7e-06	-0.17	Muscle - Skeletal
ENSG00000116701.10	NCF2	1_183583873_C_A_b37	rs140156940	5.7e-06	-0.45	Artery - Tibial
ENSG00000116701.10	NCF2	1_183454188_A_G_b37	rs10911342	5.7e-06	-0.29	Skin - Not Sun Exposed (Suprapubic)
ENSG00000116701.10	NCF2	1_183415318_A_G_b37	rs4047801	5.8e-06	-0.22	Artery - Tibial
ENSG00000116701.10	NCF2	1_183637082_ACT_A_b37	rs60783383	5.8e-06	0.41	Pituitary
ENSG00000116701.10	NCF2	1_183265801_C_T_b37	rs12046529	5.8e-06	-0.37	Skin - Not Sun Exposed (Suprapubic)
ENSG00000116701.10	NCF2	1_183689266_T_C_b37	rs4609393	5.8e-06	0.17	Muscle - Skeletal
ENSG00000116701.10	NCF2	1_182989335_A_AT_b37	rs372838174	5.9e-06	-0.2	Skin - Not Sun Exposed (Suprapubic)
ENSG00000116701.10	NCF2	1_183690467_G_A_b37	rs10494566	6e-06	-0.27	Skin - Sun Exposed (Lower leg)
ENSG00000116701.10	NCF2	1_183707633_C_A_b37	rs7552887	6e-06	0.12	Adipose - Visceral (Omentum)
ENSG00000116701.10	NCF2	1_182970474_C_CA_b37	rs34850574	6.1e-06	-0.2	Skin - Not Sun Exposed (Suprapubic)
ENSG00000116701.10	NCF2	1_183701011_C_T_b37	rs12726055	6.1e-06	0.12	Adipose - Visceral (Omentum)
ENSG00000116701.10	NCF2	1_183584150_T_A_b37	rs12067848	6.2e-06	0.4	Pituitary
ENSG00000116701.10	NCF2	1_183746262_G_A_b37	rs13375745	6.3e-06	-0.26	Skin - Sun Exposed (Lower leg)
ENSG00000116701.10	NCF2	1_183105399_C_G_b37	rs2296296	6.3e-06	-0.2	Skin - Not Sun Exposed (Suprapubic)
ENSG00000116701.10	NCF2	1_182980468_T_C_b37	rs4652760	6.4e-06	-0.2	Skin - Not Sun Exposed (Suprapubic)
ENSG00000116701.10	NCF2	1_183584354_C_T_b37	rs12082958	6.4e-06	-0.12	Adipose - Subcutaneous
ENSG00000116701.10	NCF2	1_183592570_C_T_b37	rs17488675	6.4e-06	0.33	Cells - Transformed fibroblasts
ENSG00000116701.10	NCF2	1_183563840_C_T_b37	rs11580439	6.5e-06	-0.38	Nerve - Tibial
ENSG00000116701.10	NCF2	1_183732549_A_C_b37	rs6677040	6.5e-06	-0.26	Skin - Sun Exposed (Lower leg)
ENSG00000116701.10	NCF2	1_183405648_T_C_b37	rs6424896	6.5e-06	-0.22	Artery - Tibial
ENSG00000116701.10	NCF2	1_183405794_G_A_b37	rs6684015	6.5e-06	-0.22	Artery - Tibial
ENSG00000116701.10	NCF2	1_183405853_A_G_b37	rs6659327	6.5e-06	-0.22	Artery - Tibial
ENSG00000116701.10	NCF2	1_182973186_C_T_b37	rs8179262	6.5e-06	-0.2	Skin - Not Sun Exposed (Suprapubic)
ENSG00000116701.10	NCF2	1_182980195_A_G_b37	rs4403588	6.6e-06	-0.2	Skin - Not Sun Exposed (Suprapubic)
ENSG00000116701.10	NCF2	1_182980880_T_C_b37	rs10797809	6.6e-06	-0.2	Skin - Not Sun Exposed (Suprapubic)
ENSG00000116701.10	NCF2	1_182985525_G_C_b37	rs12028732	6.6e-06	-0.2	Skin - Not Sun Exposed (Suprapubic)
ENSG00000116701.10	NCF2	1_183558437_G_A_b37	rs35550074	6.6e-06	0.39	Pituitary
ENSG00000116701.10	NCF2	1_183602795_A_G_b37	rs2254972	6.7e-06	-0.13	Adipose - Visceral (Omentum)
ENSG00000116701.10	NCF2	1_183711483_C_T_b37	rs3820689	6.8e-06	0.12	Adipose - Visceral (Omentum)
ENSG00000116701.10	NCF2	1_182969010_A_G_b37	rs3935221	6.8e-06	-0.2	Skin - Not Sun Exposed (Suprapubic)
ENSG00000116701.10	NCF2	1_183641356_T_C_b37	rs1174676	6.9e-06	0.29	Nerve - Tibial
ENSG00000116701.10	NCF2	1_183667180_A_G_b37	rs4388653	6.9e-06	-0.17	Esophagus - Mucosa
ENSG00000116701.10	NCF2	1_183580826_T_C_b37	rs2761562	6.9e-06	0.4	Pituitary
ENSG00000116701.10	NCF2	1_183712775_T_G_b37	rs1887245	6.9e-06	0.12	Adipose - Visceral (Omentum)
ENSG00000116701.10	NCF2	1_183717664_T_C_b37	rs7535070	7e-06	0.12	Adipose - Visceral (Omentum)
ENSG00000116701.10	NCF2	1_183566431_A_G_b37	rs10797893	7e-06	-0.39	Nerve - Tibial
ENSG00000116701.10	NCF2	1_183724611_G_A_b37	rs10911430	7.1e-06	0.12	Adipose - Visceral (Omentum)
ENSG00000116701.10	NCF2	1_183340238_A_G_b37	rs527825	7.1e-06	0.24	Artery - Tibial
ENSG00000116701.10	NCF2	1_183029070_T_G_b37	rs4266836	7.2e-06	-0.2	Skin - Not Sun Exposed (Suprapubic)
ENSG00000116701.10	NCF2	1_183545665_C_T_b37	rs12122217	7.2e-06	0.23	Artery - Tibial
ENSG00000116701.10	NCF2	1_183527103_T_C_b37	rs789182	7.2e-06	-0.24	Skin - Sun Exposed (Lower leg)
ENSG00000116701.10	NCF2	1_182970547_A_G_b37	rs4651135	7.3e-06	-0.2	Skin - Not Sun Exposed (Suprapubic)
ENSG00000116701.10	NCF2	1_183576552_T_C_b37	rs2767307	7.4e-06	-0.25	Artery - Coronary
ENSG00000116701.10	NCF2	1_183602795_A_G_b37	rs2254972	7.4e-06	0.39	Pituitary
ENSG00000116701.10	NCF2	1_183596136_A_G_b37	rs11755	7.4e-06	0.39	Pituitary
ENSG00000116701.10	NCF2	1_183604905_A_G_b37	rs2767305	7.4e-06	0.39	Pituitary
ENSG00000116701.10	NCF2	1_183738121_A_G_b37	rs4592228	7.5e-06	0.12	Adipose - Visceral (Omentum)
ENSG00000116701.10	NCF2	1_183631859_A_G_b37	rs1174669	7.5e-06	0.3	Cells - Transformed fibroblasts
ENSG00000116701.10	NCF2	1_183671556_C_G_b37	rs2148627	7.5e-06	0.12	Adipose - Visceral (Omentum)
ENSG00000116701.10	NCF2	1_183596136_A_G_b37	rs11755	7.6e-06	-0.13	Adipose - Visceral (Omentum)
ENSG00000116701.10	NCF2	1_183667375_A_C_b37	rs10911417	7.7e-06	-0.32	Nerve - Tibial
ENSG00000116701.10	NCF2	1_183667908_T_C_b37	rs10494565	7.7e-06	-0.32	Nerve - Tibial
ENSG00000116701.10	NCF2	1_183671821_C_T_b37	rs12092963	7.7e-06	-0.32	Nerve - Tibial
ENSG00000116701.10	NCF2	1_183674209_C_T_b37	rs12096023	7.7e-06	-0.32	Nerve - Tibial
ENSG00000116701.10	NCF2	1_183675931_G_A_b37	rs10911419	7.7e-06	-0.32	Nerve - Tibial
ENSG00000116701.10	NCF2	1_183685414_A_G_b37	rs16861502	7.7e-06	-0.32	Nerve - Tibial
ENSG00000116701.10	NCF2	1_183693410_A_G_b37	rs6681332	7.7e-06	-0.32	Nerve - Tibial
ENSG00000116701.10	NCF2	1_183694212_T_C_b37	rs6673065	7.7e-06	-0.32	Nerve - Tibial
ENSG00000116701.10	NCF2	1_183694248_G_A_b37	rs6660434	7.7e-06	-0.32	Nerve - Tibial
ENSG00000116701.10	NCF2	1_183605193_T_TG_b37	rs368849788	7.8e-06	-0.38	Nerve - Tibial
ENSG00000116701.10	NCF2	1_183681738_G_C_b37	rs1887246	7.9e-06	0.12	Adipose - Visceral (Omentum)
ENSG00000116701.10	NCF2	1_183669774_G_A_b37	rs12130947	8e-06	0.16	Muscle - Skeletal
ENSG00000116701.10	NCF2	1_183054827_A_G_b37	rs4652773	8e-06	-0.2	Skin - Not Sun Exposed (Suprapubic)
ENSG00000116701.10	NCF2	1_183700018_T_C_b37	rs10494567	8.1e-06	-0.32	Nerve - Tibial
ENSG00000116701.10	NCF2	1_183591847_T_A_b37	rs2862067	8.2e-06	0.32	Cells - Transformed fibroblasts
ENSG00000116701.10	NCF2	1_183593512_G_A_b37	rs4084535	8.2e-06	0.32	Cells - Transformed fibroblasts
ENSG00000116701.10	NCF2	1_183595069_C_G_b37	rs3856127	8.2e-06	0.32	Cells - Transformed fibroblasts
ENSG00000116701.10	NCF2	1_183598350_A_T_b37	rs4652822	8.2e-06	0.32	Cells - Transformed fibroblasts
ENSG00000116701.10	NCF2	1_183284987_C_T_b37	rs10911303	8.2e-06	-0.31	Skin - Sun Exposed (Lower leg)
ENSG00000116701.10	NCF2	1_183718735_G_A_b37	rs12727643	8.3e-06	0.12	Adipose - Visceral (Omentum)
ENSG00000116701.10	NCF2	1_183591031_A_G_b37	rs4651154	8.4e-06	0.32	Cells - Transformed fibroblasts
ENSG00000116701.10	NCF2	1_183053001_A_C_b37	rs10911234	8.5e-06	-0.2	Skin - Not Sun Exposed (Suprapubic)
ENSG00000116701.10	NCF2	1_183001312_C_A_b37	rs4651138	8.5e-06	-0.2	Skin - Not Sun Exposed (Suprapubic)
ENSG00000116701.10	NCF2	1_183009196_T_C_b37	rs4652769	8.5e-06	-0.2	Skin - Not Sun Exposed (Suprapubic)
ENSG00000116701.10	NCF2	1_183021910_A_G_b37	rs10752890	8.5e-06	-0.2	Skin - Not Sun Exposed (Suprapubic)
ENSG00000116701.10	NCF2	1_183048084_T_C_b37	rs10911223	8.5e-06	-0.2	Skin - Not Sun Exposed (Suprapubic)
ENSG00000116701.10	NCF2	1_182994468_TA_T_b37	rs398049831	8.5e-06	-0.2	Skin - Not Sun Exposed (Suprapubic)
ENSG00000116701.10	NCF2	1_183751640_T_C_b37	rs10911435	8.6e-06	0.12	Adipose - Visceral (Omentum)
ENSG00000116701.10	NCF2	1_183717729_T_G_b37	rs7535084	8.6e-06	0.12	Adipose - Subcutaneous
ENSG00000116701.10	NCF2	1_183603399_A_G_b37	rs2767304	8.8e-06	0.3	Cells - Transformed fibroblasts
ENSG00000116701.10	NCF2	1_183523551_T_TAAGA_b37	rs2308168	8.8e-06	-0.26	Skin - Sun Exposed (Lower leg)
ENSG00000116701.10	NCF2	1_183579726_TG_T_b37	rs796140731	8.8e-06	-0.12	Adipose - Subcutaneous
ENSG00000116701.10	NCF2	1_183579729_G_T_b37	rs34840421	8.8e-06	-0.12	Adipose - Subcutaneous
ENSG00000116701.10	NCF2	1_183584285_G_A_b37	rs12062368	8.8e-06	-0.12	Adipose - Subcutaneous
ENSG00000116701.10	NCF2	1_183266611_G_A_b37	rs138305154	8.9e-06	-0.36	Skin - Not Sun Exposed (Suprapubic)
ENSG00000116701.10	NCF2	1_183715357_G_T_b37	rs2148621	8.9e-06	0.12	Adipose - Visceral (Omentum)
ENSG00000116701.10	NCF2	1_183604905_A_G_b37	rs2767305	8.9e-06	-0.12	Adipose - Visceral (Omentum)
ENSG00000116701.10	NCF2	1_183563161_C_G_b37	rs11579965	8.9e-06	-0.39	Nerve - Tibial
ENSG00000116701.10	NCF2	1_183581960_A_G_b37	rs2761568	9e-06	-0.12	Adipose - Subcutaneous
ENSG00000116701.10	NCF2	1_182972542_A_G_b37	rs10911186	9e-06	-0.2	Skin - Not Sun Exposed (Suprapubic)
ENSG00000116701.10	NCF2	1_183473439_G_A_b37	rs10911352	9e-06	-0.29	Skin - Not Sun Exposed (Suprapubic)
ENSG00000116701.10	NCF2	1_182970865_C_T_b37	rs4233193	9e-06	-0.2	Skin - Not Sun Exposed (Suprapubic)
ENSG00000116701.10	NCF2	1_183584735_C_G_b37	rs28812191	9.1e-06	-0.38	Nerve - Tibial
ENSG00000116701.10	NCF2	1_183709348_C_T_b37	rs6658466	9.1e-06	0.12	Adipose - Visceral (Omentum)
ENSG00000116701.10	NCF2	1_183446104_G_A_b37	rs11802011	9.1e-06	-0.29	Skin - Not Sun Exposed (Suprapubic)
ENSG00000116701.10	NCF2	1_183441991_G_A_b37	rs6671819	9.1e-06	-0.29	Skin - Not Sun Exposed (Suprapubic)
ENSG00000116701.10	NCF2	1_183467572_G_A_b37	rs12405633	9.1e-06	-0.29	Skin - Not Sun Exposed (Suprapubic)
ENSG00000116701.10	NCF2	1_183705589_T_C_b37	rs12120527	9.2e-06	0.12	Adipose - Visceral (Omentum)
ENSG00000116701.10	NCF2	1_183706275_A_G_b37	rs10911427	9.2e-06	0.12	Adipose - Visceral (Omentum)
ENSG00000116701.10	NCF2	1_183707103_A_G_b37	rs7529946	9.2e-06	0.12	Adipose - Visceral (Omentum)
ENSG00000116701.10	NCF2	1_183707989_C_T_b37	rs12133760	9.2e-06	0.12	Adipose - Visceral (Omentum)
ENSG00000116701.10	NCF2	1_183708921_T_C_b37	rs12760943	9.2e-06	0.12	Adipose - Visceral (Omentum)
ENSG00000116701.10	NCF2	1_183709210_A_G_b37	rs10911428	9.2e-06	0.12	Adipose - Visceral (Omentum)
ENSG00000116701.10	NCF2	1_183709692_C_G_b37	rs6658871	9.2e-06	0.12	Adipose - Visceral (Omentum)
ENSG00000116701.10	NCF2	1_183710963_C_T_b37	rs7520083	9.2e-06	0.12	Adipose - Visceral (Omentum)
ENSG00000116701.10	NCF2	1_183712910_AC_A_b37	rs34055777	9.2e-06	0.12	Adipose - Visceral (Omentum)
ENSG00000116701.10	NCF2	1_183581038_G_T_b37	rs2476571	9.2e-06	-0.12	Adipose - Subcutaneous
ENSG00000116701.10	NCF2	1_183580427_C_T_b37	rs2767313	9.2e-06	-0.12	Adipose - Subcutaneous
ENSG00000116701.10	NCF2	1_183482785_G_A_b37	rs143885630	9.3e-06	-0.29	Skin - Not Sun Exposed (Suprapubic)
ENSG00000116701.10	NCF2	1_183721595_T_C_b37	rs10127868	9.4e-06	0.12	Adipose - Visceral (Omentum)
ENSG00000116701.10	NCF2	1_183721649_T_C_b37	rs10127870	9.4e-06	0.12	Adipose - Visceral (Omentum)
ENSG00000116701.10	NCF2	1_183481102_C_A_b37	rs77960299	9.5e-06	-0.28	Skin - Not Sun Exposed (Suprapubic)
ENSG00000116701.10	NCF2	1_182971816_T_C_b37	rs10737235	9.6e-06	-0.2	Skin - Not Sun Exposed (Suprapubic)
ENSG00000116701.10	NCF2	1_182973158_T_A_b37	rs10797802	9.6e-06	-0.2	Skin - Not Sun Exposed (Suprapubic)
ENSG00000116701.10	NCF2	1_183720001_G_T_b37	rs12126025	9.7e-06	0.12	Adipose - Visceral (Omentum)
ENSG00000116701.10	NCF2	1_183456019_G_A_b37	rs10911343	9.7e-06	-0.29	Skin - Not Sun Exposed (Suprapubic)
ENSG00000116701.10	NCF2	1_183051485_C_G_b37	rs115440419	9.8e-06	-0.43	Nerve - Tibial
ENSG00000116701.10	NCF2	1_183601331_C_T_b37	rs17436125	9.8e-06	0.32	Cells - Transformed fibroblasts
ENSG00000116701.10	NCF2	1_183716548_T_C_b37	rs6695689	9.9e-06	0.12	Adipose - Visceral (Omentum)
ENSG00000116701.10	NCF2	1_183720434_A_G_b37	rs2148622	9.9e-06	0.12	Adipose - Visceral (Omentum)
ENSG00000116701.10	NCF2	1_183722930_A_G_b37	rs7516454	9.9e-06	0.12	Adipose - Visceral (Omentum)
ENSG00000116701.10	NCF2	1_183724424_C_T_b37	rs12139504	9.9e-06	0.12	Adipose - Visceral (Omentum)
ENSG00000116701.10	NCF2	1_183727400_T_C_b37	rs6424910	9.9e-06	0.12	Adipose - Visceral (Omentum)
ENSG00000116701.10	NCF2	1_183728854_T_G_b37	rs1112003	9.9e-06	0.12	Adipose - Visceral (Omentum)
ENSG00000116701.10	NCF2	1_183691923_C_G_b37	rs6699197	9.9e-06	0.12	Adipose - Visceral (Omentum)
ENSG00000116701.10	NCF2	1_183531938_G_A_b37	rs12405210	9.9e-06	-0.25	Skin - Sun Exposed (Lower leg)
ENSG00000116701.10	NCF2	1_183484405_CTT_C_b37	rs140840	9.9e-06	-0.31	Skin - Not Sun Exposed (Suprapubic)
ENSG00000116701.10	NCF2	1_183644173_G_A_b37	rs12120000	1e-05	0.16	Muscle - Skeletal
ENSG00000116701.10	NCF2	1_183666920_G_A_b37	rs4507976	1e-05	0.16	Muscle - Skeletal
ENSG00000116701.10	NCF2	1_183655833_G_A_b37	rs9650989	1e-05	-0.31	Cells - Transformed fibroblasts
ENSG00000116701.10	NCF2	1_183725869_C_G_b37	rs12141506	1e-05	0.12	Adipose - Visceral (Omentum)
ENSG00000116701.10	NCF2	1_183647995_G_A_b37	rs12724273	1e-05	0.16	Muscle - Skeletal
ENSG00000116701.10	NCF2	1_183566913_C_T_b37	rs41439047	1e-05	0.39	Pituitary
ENSG00000116701.10	NCF2	1_183567085_G_A_b37	rs35682376	1e-05	0.39	Pituitary
ENSG00000116701.10	NCF2	1_183570545_G_T_b37	rs10489762	1e-05	0.39	Pituitary
ENSG00000116701.10	NCF2	1_183670425_C_T_b37	rs1926837	1e-05	0.12	Adipose - Visceral (Omentum)
ENSG00000116701.10	NCF2	1_183612828_C_T_b37	rs10911386	1e-05	-0.37	Nerve - Tibial
ENSG00000116701.10	NCF2	1_183554449_T_C_b37	rs699240	1.1e-05	-0.12	Adipose - Visceral (Omentum)
ENSG00000116701.10	NCF2	1_183696240_C_A_b37	rs56402527	1.1e-05	0.12	Adipose - Visceral (Omentum)
ENSG00000116701.10	NCF2	1_183710374_A_T_b37	rs4489521	1.1e-05	0.12	Adipose - Visceral (Omentum)
ENSG00000116701.10	NCF2	1_183704400_T_G_b37	rs12734523	1.1e-05	0.12	Adipose - Visceral (Omentum)
ENSG00000116701.10	NCF2	1_183704768_T_G_b37	rs12119590	1.1e-05	0.12	Adipose - Visceral (Omentum)
ENSG00000116701.10	NCF2	1_183001622_G_T_b37	rs10911201	1.1e-05	-0.2	Skin - Not Sun Exposed (Suprapubic)
ENSG00000116701.10	NCF2	1_183700152_A_G_b37	rs4087609	1.1e-05	0.16	Muscle - Skeletal
ENSG00000116701.10	NCF2	1_183722930_A_G_b37	rs7516454	1.1e-05	0.12	Adipose - Subcutaneous
ENSG00000116701.10	NCF2	1_183561517_T_C_b37	rs10911367	1.1e-05	-0.17	Muscle - Skeletal
ENSG00000116701.10	NCF2	1_183726404_A_G_b37	rs12737637	1.1e-05	0.12	Adipose - Visceral (Omentum)
ENSG00000116701.10	NCF2	1_183737203_T_C_b37	rs6664373	1.1e-05	0.12	Adipose - Visceral (Omentum)
ENSG00000116701.10	NCF2	1_183568298_A_G_b37	rs59591433	1.1e-05	-0.25	Artery - Coronary
ENSG00000116701.10	NCF2	1_183719759_TGGA_T_b37	rs367640092	1.1e-05	0.12	Adipose - Visceral (Omentum)
ENSG00000116701.10	NCF2	1_183065360_T_TA_b37	rs397753944	1.1e-05	-0.2	Skin - Not Sun Exposed (Suprapubic)
ENSG00000116701.10	NCF2	1_183073266_A_G_b37	rs2027075	1.1e-05	-0.2	Skin - Not Sun Exposed (Suprapubic)
ENSG00000116701.10	NCF2	1_183080564_G_A_b37	rs10911248	1.1e-05	-0.2	Skin - Not Sun Exposed (Suprapubic)
ENSG00000116701.10	NCF2	1_183583892_A_G_b37	rs149830921	1.1e-05	-0.36	Nerve - Tibial
ENSG00000116701.10	NCF2	1_183738565_T_C_b37	rs1926835	1.1e-05	0.12	Adipose - Visceral (Omentum)
ENSG00000116701.10	NCF2	1_183750249_T_C_b37	rs1926833	1.1e-05	0.12	Adipose - Visceral (Omentum)
ENSG00000116701.10	NCF2	1_183752588_T_C_b37	rs10911436	1.1e-05	0.12	Adipose - Visceral (Omentum)
ENSG00000116701.10	NCF2	1_183753930_A_T_b37	rs7519596	1.1e-05	0.12	Adipose - Visceral (Omentum)
ENSG00000116701.10	NCF2	1_183606747_C_A_b37	rs1174686	1.1e-05	0.31	Cells - Transformed fibroblasts
ENSG00000116701.10	NCF2	1_183717729_T_G_b37	rs7535084	1.1e-05	0.12	Adipose - Visceral (Omentum)
ENSG00000116701.10	NCF2	1_183671556_C_G_b37	rs2148627	1.1e-05	0.16	Muscle - Skeletal
ENSG00000116701.10	NCF2	1_183575927_TAGCACTTTGGGAGGCTGTAATCTC_T_b37	rs373084731	1.1e-05	0.32	Cells - Transformed fibroblasts
ENSG00000116701.10	NCF2	1_183583164_C_T_b37	rs377482073	1.1e-05	-0.12	Adipose - Subcutaneous
ENSG00000116701.10	NCF2	1_183690371_G_A_b37	rs1926825	1.2e-05	-0.39	Pituitary
ENSG00000116701.10	NCF2	1_183708428_G_A_b37	rs6703990	1.2e-05	-0.39	Pituitary
ENSG00000116701.10	NCF2	1_183739363_C_T_b37	rs1926834	1.2e-05	0.12	Adipose - Visceral (Omentum)
ENSG00000116701.10	NCF2	1_183711823_G_A_b37	rs12401632	1.2e-05	-0.28	Skin - Sun Exposed (Lower leg)
ENSG00000116701.10	NCF2	1_182970337_T_A_b37	rs12753817	1.2e-05	-0.2	Skin - Not Sun Exposed (Suprapubic)
ENSG00000116701.10	NCF2	1_183670425_C_T_b37	rs1926837	1.2e-05	0.16	Muscle - Skeletal
ENSG00000116701.10	NCF2	1_183656278_T_C_b37	rs6664058	1.2e-05	-0.31	Cells - Transformed fibroblasts
ENSG00000116701.10	NCF2	1_183675169_T_C_b37	rs12739778	1.2e-05	0.16	Muscle - Skeletal
ENSG00000116701.10	NCF2	1_183676719_G_T_b37	rs12132735	1.2e-05	0.16	Muscle - Skeletal
ENSG00000116701.10	NCF2	1_183715181_T_G_b37	rs2182593	1.2e-05	0.12	Adipose - Visceral (Omentum)
ENSG00000116701.10	NCF2	1_183579123_C_G_b37	rs2761555	1.2e-05	0.37	Pituitary
ENSG00000116701.10	NCF2	1_183639883_T_C_b37	rs56364265	1.2e-05	0.36	Artery - Tibial
ENSG00000116701.10	NCF2	1_183580827_G_A_b37	rs2761563	1.2e-05	-0.12	Adipose - Subcutaneous
ENSG00000116701.10	NCF2	1_183582249_A_G_b37	rs2767316	1.2e-05	-0.12	Adipose - Subcutaneous
ENSG00000116701.10	NCF2	1_183701011_C_T_b37	rs12726055	1.2e-05	0.12	Adipose - Subcutaneous
ENSG00000116701.10	NCF2	1_183579123_C_G_b37	rs2761555	1.2e-05	-0.25	Artery - Coronary
ENSG00000116701.10	NCF2	1_183159377_T_C_b37	rs1005716	1.2e-05	-0.23	Skin - Sun Exposed (Lower leg)
ENSG00000116701.10	NCF2	1_183161809_C_CT_b37	rs111369141	1.2e-05	-0.23	Skin - Sun Exposed (Lower leg)
ENSG00000116701.10	NCF2	1_183727400_T_C_b37	rs6424910	1.2e-05	0.12	Adipose - Subcutaneous
ENSG00000116701.10	NCF2	1_183714485_T_TCA_b37	rs10678317	1.2e-05	0.12	Adipose - Visceral (Omentum)
ENSG00000116701.10	NCF2	1_183641356_T_C_b37	rs1174676	1.2e-05	0.23	Skin - Sun Exposed (Lower leg)
ENSG00000116701.10	NCF2	1_183576236_C_G_b37	rs2767306	1.2e-05	0.17	Esophagus - Mucosa
ENSG00000116701.10	NCF2	1_183653691_A_G_b37	rs7520442	1.3e-05	0.16	Muscle - Skeletal
ENSG00000116701.10	NCF2	1_183584067_TTC_T_b37	rs113152065	1.3e-05	-0.12	Adipose - Subcutaneous
ENSG00000116701.10	NCF2	1_183700590_C_A_b37	rs10752916	1.3e-05	0.12	Adipose - Visceral (Omentum)
ENSG00000116701.10	NCF2	1_183700591_T_A_b37	rs10752917	1.3e-05	0.12	Adipose - Visceral (Omentum)
ENSG00000116701.10	NCF2	1_183790223_C_T_b37	rs12140534	1.3e-05	-0.18	Skin - Sun Exposed (Lower leg)
ENSG00000116701.10	NCF2	1_183579379_G_A_b37	rs2761556	1.3e-05	-0.12	Adipose - Subcutaneous
ENSG00000116701.10	NCF2	1_183579585_T_A_b37	rs2767311	1.3e-05	-0.12	Adipose - Subcutaneous
ENSG00000116701.10	NCF2	1_183579911_A_G_b37	rs2767312	1.3e-05	-0.12	Adipose - Subcutaneous
ENSG00000116701.10	NCF2	1_183579973_C_T_b37	rs2761558	1.3e-05	-0.12	Adipose - Subcutaneous
ENSG00000116701.10	NCF2	1_183580279_C_T_b37	rs2761559	1.3e-05	-0.12	Adipose - Subcutaneous
ENSG00000116701.10	NCF2	1_183580653_G_C_b37	rs2761561	1.3e-05	-0.12	Adipose - Subcutaneous
ENSG00000116701.10	NCF2	1_183581755_G_A_b37	rs2761566	1.3e-05	-0.12	Adipose - Subcutaneous
ENSG00000116701.10	NCF2	1_183582172_T_C_b37	rs2767315	1.3e-05	-0.12	Adipose - Subcutaneous
ENSG00000116701.10	NCF2	1_183582765_A_G_b37	rs61811180	1.3e-05	-0.12	Adipose - Subcutaneous
ENSG00000116701.10	NCF2	1_183583021_T_C_b37	rs111610865	1.3e-05	-0.12	Adipose - Subcutaneous
ENSG00000116701.10	NCF2	1_183584159_G_A_b37	rs12062320	1.3e-05	-0.12	Adipose - Subcutaneous
ENSG00000116701.10	NCF2	1_183725185_G_A_b37	rs12070290	1.3e-05	0.12	Adipose - Visceral (Omentum)
ENSG00000116701.10	NCF2	1_183689266_T_C_b37	rs4609393	1.3e-05	0.12	Adipose - Visceral (Omentum)
ENSG00000116701.10	NCF2	1_183740750_C_T_b37	rs6424911	1.3e-05	-0.17	Esophagus - Mucosa
ENSG00000116701.10	NCF2	1_183650380_C_G_b37	rs140224751	1.3e-05	0.16	Muscle - Skeletal
ENSG00000116701.10	NCF2	1_183725087_C_T_b37	rs12090437	1.3e-05	0.12	Adipose - Visceral (Omentum)
ENSG00000116701.10	NCF2	1_183632899_G_A_b37	rs1174671	1.3e-05	0.31	Cells - Transformed fibroblasts
ENSG00000116701.10	NCF2	1_183466305_T_C_b37	rs12035803	1.3e-05	-0.31	Skin - Not Sun Exposed (Suprapubic)
ENSG00000116701.10	NCF2	1_183759410_G_A_b37	rs4609388	1.3e-05	-0.17	Esophagus - Mucosa
ENSG00000116701.10	NCF2	1_183646354_T_C_b37	rs1174679	1.3e-05	0.31	Cells - Transformed fibroblasts
ENSG00000116701.10	NCF2	1_183649710_T_C_b37	rs1174682	1.3e-05	0.31	Cells - Transformed fibroblasts
ENSG00000116701.10	NCF2	1_183654325_C_T_b37	rs1174685	1.3e-05	0.31	Cells - Transformed fibroblasts
ENSG00000116701.10	NCF2	1_183583916_C_G_b37	rs77466579	1.3e-05	-0.43	Artery - Tibial
ENSG00000116701.10	NCF2	1_182996827_A_G_b37	rs10797815	1.3e-05	-0.2	Skin - Not Sun Exposed (Suprapubic)
ENSG00000116701.10	NCF2	1_183582830_G_A_b37	rs61811181	1.3e-05	-0.12	Adipose - Subcutaneous
ENSG00000116701.10	NCF2	1_183602795_A_G_b37	rs2254972	1.3e-05	-0.12	Adipose - Subcutaneous
ENSG00000116701.10	NCF2	1_183352636_GC_G_b37	rs34743723	1.3e-05	-0.32	Skin - Not Sun Exposed (Suprapubic)
ENSG00000116701.10	NCF2	1_183359879_C_T_b37	rs78316688	1.3e-05	-0.32	Skin - Not Sun Exposed (Suprapubic)
ENSG00000116701.10	NCF2	1_183376980_G_T_b37	rs10494563	1.3e-05	-0.32	Skin - Not Sun Exposed (Suprapubic)
ENSG00000116701.10	NCF2	1_183583992_C_T_b37	rs75940660	1.3e-05	-0.12	Adipose - Subcutaneous
ENSG00000116701.10	NCF2	1_183583993_A_G_b37	rs75435975	1.3e-05	-0.12	Adipose - Subcutaneous
ENSG00000116701.10	NCF2	1_183380407_T_C_b37	rs1361197	1.3e-05	0.24	Artery - Tibial
ENSG00000116701.10	NCF2	1_183713927_T_C_b37	rs7539345	1.3e-05	0.12	Adipose - Visceral (Omentum)
ENSG00000116701.10	NCF2	1_183714149_A_C_b37	rs7552115	1.4e-05	0.12	Adipose - Visceral (Omentum)
ENSG00000116701.10	NCF2	1_183620363_G_T_b37	rs1174659	1.4e-05	0.31	Cells - Transformed fibroblasts
ENSG00000116701.10	NCF2	1_183622658_A_G_b37	rs1174660	1.4e-05	0.31	Cells - Transformed fibroblasts
ENSG00000116701.10	NCF2	1_183583937_A_C_b37	rs75705092	1.4e-05	-0.12	Adipose - Subcutaneous
ENSG00000116701.10	NCF2	1_183583950_C_T_b37	rs78070601	1.4e-05	-0.12	Adipose - Subcutaneous
ENSG00000116701.10	NCF2	1_183583107_G_T_b37	rs62031859	1.4e-05	-0.12	Adipose - Subcutaneous
ENSG00000116701.10	NCF2	1_183682307_T_C_b37	rs6698736	1.4e-05	0.12	Adipose - Visceral (Omentum)
ENSG00000116701.10	NCF2	1_183683749_C_G_b37	rs12119579	1.4e-05	0.12	Adipose - Visceral (Omentum)
ENSG00000116701.10	NCF2	1_183684635_G_GT_b37	rs397935294	1.4e-05	0.12	Adipose - Visceral (Omentum)
ENSG00000116701.10	NCF2	1_183687001_A_G_b37	rs12145081	1.4e-05	0.12	Adipose - Visceral (Omentum)
ENSG00000116701.10	NCF2	1_182984027_C_T_b37	rs36043504	1.4e-05	-0.19	Skin - Not Sun Exposed (Suprapubic)
ENSG00000116701.10	NCF2	1_183583150_C_G_b37	rs75815911	1.4e-05	-0.17	Muscle - Skeletal
ENSG00000116701.10	NCF2	1_183583101_A_G_b37	rs74755153	1.4e-05	-0.12	Adipose - Subcutaneous
ENSG00000116701.10	NCF2	1_183612097_C_T_b37	rs1174688	1.4e-05	0.31	Cells - Transformed fibroblasts
ENSG00000116701.10	NCF2	1_183675169_T_C_b37	rs12739778	1.4e-05	0.12	Adipose - Visceral (Omentum)
ENSG00000116701.10	NCF2	1_183676719_G_T_b37	rs12132735	1.4e-05	0.12	Adipose - Visceral (Omentum)
ENSG00000116701.10	NCF2	1_183713733_C_A_b37	rs12738712	1.4e-05	0.12	Adipose - Visceral (Omentum)
ENSG00000116701.10	NCF2	1_182977036_A_AT_b37	rs34379581	1.4e-05	-0.2	Skin - Not Sun Exposed (Suprapubic)
ENSG00000116701.10	NCF2	1_183726312_C_T_b37	rs35822817	1.4e-05	0.12	Adipose - Visceral (Omentum)
ENSG00000116701.10	NCF2	1_183707703_C_G_b37	rs7552987	1.4e-05	0.12	Adipose - Visceral (Omentum)
ENSG00000116701.10	NCF2	1_183628095_C_T_b37	rs7541678	1.4e-05	0.12	Adipose - Visceral (Omentum)
ENSG00000116701.10	NCF2	1_183696874_A_G_b37	rs12562713	1.4e-05	0.12	Adipose - Visceral (Omentum)
ENSG00000116701.10	NCF2	1_183695313_G_T_b37	rs6424908	1.4e-05	0.12	Adipose - Visceral (Omentum)
ENSG00000116701.10	NCF2	1_183561560_C_A_b37	rs12066019	1.4e-05	-0.38	Nerve - Tibial
ENSG00000116701.10	NCF2	1_183561697_A_G_b37	rs12096702	1.4e-05	-0.38	Nerve - Tibial
ENSG00000116701.10	NCF2	1_183561725_G_T_b37	rs12086699	1.4e-05	-0.38	Nerve - Tibial
ENSG00000116701.10	NCF2	1_183701011_C_T_b37	rs12726055	1.5e-05	0.16	Muscle - Skeletal
ENSG00000116701.10	NCF2	1_183745530_G_A_b37	rs12136408	1.5e-05	0.12	Adipose - Subcutaneous
ENSG00000116701.10	NCF2	1_183702071_G_C_b37	rs10911426	1.5e-05	0.16	Muscle - Skeletal
ENSG00000116701.10	NCF2	1_183702455_T_A_b37	rs7536447	1.5e-05	0.16	Muscle - Skeletal
ENSG00000116701.10	NCF2	1_183714508_T_A_b37	rs34484934	1.5e-05	0.12	Adipose - Visceral (Omentum)
ENSG00000116701.10	NCF2	1_183714509_GT_G_b37	rs869277201	1.5e-05	0.12	Adipose - Visceral (Omentum)
ENSG00000116701.10	NCF2	1_183700521_G_A_b37	rs10752915	1.5e-05	0.16	Muscle - Skeletal
ENSG00000116701.10	NCF2	1_183094314_T_C_b37	rs2093984	1.5e-05	-0.19	Skin - Not Sun Exposed (Suprapubic)
ENSG00000116701.10	NCF2	1_183618065_G_T_b37	rs12088609	1.5e-05	-0.41	Artery - Tibial
ENSG00000116701.10	NCF2	1_183738892_G_T_b37	rs10911432	1.5e-05	0.12	Adipose - Subcutaneous
ENSG00000116701.10	NCF2	1_183681738_G_C_b37	rs1887246	1.5e-05	0.16	Muscle - Skeletal
ENSG00000116701.10	NCF2	1_183704400_T_G_b37	rs12734523	1.5e-05	0.16	Muscle - Skeletal
ENSG00000116701.10	NCF2	1_182975202_G_A_b37	rs9943069	1.5e-05	-0.2	Skin - Not Sun Exposed (Suprapubic)
ENSG00000116701.10	NCF2	1_182978306_C_T_b37	rs9787083	1.5e-05	-0.19	Skin - Not Sun Exposed (Suprapubic)
ENSG00000116701.10	NCF2	1_183085304_T_C_b37	rs6692207	1.6e-05	-0.2	Skin - Not Sun Exposed (Suprapubic)
ENSG00000116701.10	NCF2	1_183637082_ACT_A_b37	rs60783383	1.6e-05	0.31	Cells - Transformed fibroblasts
ENSG00000116701.10	NCF2	1_182974707_C_T_b37	rs8179284	1.6e-05	-0.19	Skin - Not Sun Exposed (Suprapubic)
ENSG00000116701.10	NCF2	1_183597537_C_T_b37	rs10911382	1.6e-05	-0.38	Nerve - Tibial
ENSG00000116701.10	NCF2	1_183738121_A_G_b37	rs4592228	1.6e-05	0.12	Adipose - Subcutaneous
ENSG00000116701.10	NCF2	1_183720001_G_T_b37	rs12126025	1.6e-05	0.12	Adipose - Subcutaneous
ENSG00000116701.10	NCF2	1_182988352_G_A_b37	rs4483371	1.6e-05	-0.19	Skin - Not Sun Exposed (Suprapubic)
ENSG00000116701.10	NCF2	1_183721595_T_C_b37	rs10127868	1.6e-05	0.11	Adipose - Subcutaneous
ENSG00000116701.10	NCF2	1_183665652_C_G_b37	rs2148624	1.6e-05	-0.38	Pituitary
ENSG00000116701.10	NCF2	1_183716548_T_C_b37	rs6695689	1.6e-05	0.11	Adipose - Subcutaneous
ENSG00000116701.10	NCF2	1_183720434_A_G_b37	rs2148622	1.6e-05	0.11	Adipose - Subcutaneous
ENSG00000116701.10	NCF2	1_183724424_C_T_b37	rs12139504	1.6e-05	0.11	Adipose - Subcutaneous
ENSG00000116701.10	NCF2	1_183725869_C_G_b37	rs12141506	1.6e-05	0.11	Adipose - Subcutaneous
ENSG00000116701.10	NCF2	1_183726312_C_T_b37	rs35822817	1.6e-05	0.11	Adipose - Subcutaneous
ENSG00000116701.10	NCF2	1_183728854_T_G_b37	rs1112003	1.6e-05	0.11	Adipose - Subcutaneous
ENSG00000116701.10	NCF2	1_183721649_T_C_b37	rs10127870	1.6e-05	0.11	Adipose - Subcutaneous
ENSG00000116701.10	NCF2	1_183153094_T_C_b37	rs3754525	1.6e-05	-0.32	Nerve - Tibial
ENSG00000116701.10	NCF2	1_183713580_CTT_C_b37	rs34691557	1.6e-05	-0.31	Nerve - Tibial
ENSG00000116701.10	NCF2	1_183725121_C_T_b37	rs10797906	1.6e-05	-0.31	Nerve - Tibial
ENSG00000116701.10	NCF2	1_183616687_G_A_b37	rs1174656	1.6e-05	0.31	Cells - Transformed fibroblasts
ENSG00000116701.10	NCF2	1_183583101_A_G_b37	rs74755153	1.6e-05	-0.16	Muscle - Skeletal
ENSG00000116701.10	NCF2	1_183326828_A_G_b37	rs548292	1.6e-05	0.24	Artery - Tibial
ENSG00000116701.10	NCF2	1_183654325_C_T_b37	rs1174685	1.6e-05	0.39	Pituitary
ENSG00000116701.10	NCF2	1_183752491_C_T_b37	rs4497164	1.6e-05	-0.17	Esophagus - Mucosa
ENSG00000116701.10	NCF2	1_183754672_C_T_b37	rs1952235	1.6e-05	-0.17	Esophagus - Mucosa
ENSG00000116701.10	NCF2	1_183704104_C_T_b37	rs7530552	1.6e-05	0.16	Muscle - Skeletal
ENSG00000116701.10	NCF2	1_183632899_G_A_b37	rs1174671	1.6e-05	0.39	Pituitary
ENSG00000116701.10	NCF2	1_183702926_G_A_b37	rs7525146	1.6e-05	0.16	Muscle - Skeletal
ENSG00000116701.10	NCF2	1_183694787_T_A_b37	rs2148620	1.6e-05	0.16	Muscle - Skeletal
ENSG00000116701.10	NCF2	1_183612097_C_T_b37	rs1174688	1.6e-05	0.39	Pituitary
ENSG00000116701.10	NCF2	1_183616687_G_A_b37	rs1174656	1.6e-05	0.39	Pituitary
ENSG00000116701.10	NCF2	1_183622658_A_G_b37	rs1174660	1.6e-05	0.39	Pituitary
ENSG00000116701.10	NCF2	1_183623619_G_C_b37	rs1184639	1.6e-05	0.39	Pituitary
ENSG00000116701.10	NCF2	1_183639173_C_T_b37	rs1174674	1.6e-05	0.39	Pituitary
ENSG00000116701.10	NCF2	1_183646354_T_C_b37	rs1174679	1.6e-05	0.39	Pituitary
ENSG00000116701.10	NCF2	1_183649710_T_C_b37	rs1174682	1.6e-05	0.39	Pituitary
ENSG00000116701.10	NCF2	1_183654977_C_T_b37	rs1952236	1.6e-05	-0.39	Pituitary
ENSG00000116701.10	NCF2	1_183696874_A_G_b37	rs12562713	1.6e-05	0.16	Muscle - Skeletal
ENSG00000116701.10	NCF2	1_182984983_C_T_b37	rs4593781	1.7e-05	-0.19	Skin - Not Sun Exposed (Suprapubic)
ENSG00000116701.10	NCF2	1_183620363_G_T_b37	rs1174659	1.7e-05	0.39	Pituitary
ENSG00000116701.10	NCF2	1_183654977_C_T_b37	rs1952236	1.7e-05	-0.3	Cells - Transformed fibroblasts
ENSG00000116701.10	NCF2	1_183085324_G_A_b37	rs6679642	1.7e-05	-0.2	Skin - Not Sun Exposed (Suprapubic)
ENSG00000116701.10	NCF2	1_183583107_G_T_b37	rs62031859	1.7e-05	-0.16	Muscle - Skeletal
ENSG00000116701.10	NCF2	1_182996242_C_T_b37	rs4642853	1.7e-05	-0.19	Skin - Not Sun Exposed (Suprapubic)
ENSG00000116701.10	NCF2	1_182995399_T_C_b37	rs10911197	1.7e-05	-0.19	Skin - Not Sun Exposed (Suprapubic)
ENSG00000116701.10	NCF2	1_182996291_G_C_b37	rs4369195	1.7e-05	-0.19	Skin - Not Sun Exposed (Suprapubic)
ENSG00000116701.10	NCF2	1_183639173_C_T_b37	rs1174674	1.7e-05	0.3	Cells - Transformed fibroblasts
ENSG00000116701.10	NCF2	1_183715181_T_G_b37	rs2182593	1.7e-05	0.12	Adipose - Subcutaneous
ENSG00000116701.10	NCF2	1_182974602_C_T_b37	rs8179283	1.7e-05	-0.19	Skin - Not Sun Exposed (Suprapubic)
ENSG00000116701.10	NCF2	1_183694281_C_T_b37	rs6660352	1.7e-05	0.16	Muscle - Skeletal
ENSG00000116701.10	NCF2	1_183688777_C_A_b37	rs2004077	1.7e-05	0.16	Muscle - Skeletal
ENSG00000116701.10	NCF2	1_183679912_C_T_b37	rs12746073	1.7e-05	0.16	Muscle - Skeletal
ENSG00000116701.10	NCF2	1_183698514_A_G_b37	rs1073848	1.7e-05	0.16	Muscle - Skeletal
ENSG00000116701.10	NCF2	1_183086238_G_A_b37	rs10752900	1.7e-05	-0.2	Skin - Not Sun Exposed (Suprapubic)
ENSG00000116701.10	NCF2	1_183733331_G_T_b37	rs10737248	1.7e-05	-0.31	Nerve - Tibial
ENSG00000116701.10	NCF2	1_183738142_C_A_b37	rs10797908	1.7e-05	-0.31	Nerve - Tibial
ENSG00000116701.10	NCF2	1_183738154_A_C_b37	rs10797909	1.7e-05	-0.31	Nerve - Tibial
ENSG00000116701.10	NCF2	1_183752347_TG_T_b37	rs5779185	1.7e-05	-0.31	Nerve - Tibial
ENSG00000116701.10	NCF2	1_183626523_C_G_b37	rs1174663	1.7e-05	0.31	Cells - Transformed fibroblasts
ENSG00000116701.10	NCF2	1_183072590_T_C_b37	rs2296288	1.7e-05	-0.2	Skin - Not Sun Exposed (Suprapubic)
ENSG00000116701.10	NCF2	1_183580370_G_A_b37	rs2761560	1.8e-05	-0.12	Adipose - Subcutaneous
ENSG00000116701.10	NCF2	1_183720044_T_C_b37	rs10128040	1.8e-05	0.12	Adipose - Visceral (Omentum)
ENSG00000116701.10	NCF2	1_183573228_G_A_b37	rs2767314	1.8e-05	0.16	Esophagus - Mucosa
ENSG00000116701.10	NCF2	1_183615554_T_TTA_b37	rs148078350	1.8e-05	0.32	Cells - Transformed fibroblasts
ENSG00000116701.10	NCF2	1_183661032_A_G_b37	rs2182595	1.8e-05	-0.38	Pituitary
ENSG00000116701.10	NCF2	1_182992161_T_C_b37	rs11582514	1.8e-05	-0.19	Skin - Not Sun Exposed (Suprapubic)
ENSG00000116701.10	NCF2	1_183604905_A_G_b37	rs2767305	1.8e-05	-0.11	Adipose - Subcutaneous
ENSG00000116701.10	NCF2	1_183697046_G_T_b37	rs7553224	1.8e-05	0.16	Muscle - Skeletal
ENSG00000116701.10	NCF2	1_183669720_A_G_b37	rs12138213	1.8e-05	0.12	Adipose - Visceral (Omentum)
ENSG00000116701.10	NCF2	1_183692426_A_G_b37	rs10911421	1.8e-05	0.16	Muscle - Skeletal
ENSG00000116701.10	NCF2	1_183692814_C_A_b37	rs7554816	1.8e-05	0.16	Muscle - Skeletal
ENSG00000116701.10	NCF2	1_183693921_C_T_b37	rs1926827	1.8e-05	0.16	Muscle - Skeletal
ENSG00000116701.10	NCF2	1_183694185_G_A_b37	rs6660412	1.8e-05	0.16	Muscle - Skeletal
ENSG00000116701.10	NCF2	1_183693046_T_G_b37	rs7524241	1.9e-05	0.16	Muscle - Skeletal
ENSG00000116701.10	NCF2	1_183583992_C_T_b37	rs75940660	1.9e-05	-0.16	Muscle - Skeletal
ENSG00000116701.10	NCF2	1_183583993_A_G_b37	rs75435975	1.9e-05	-0.16	Muscle - Skeletal
ENSG00000116701.10	NCF2	1_183692766_A_G_b37	rs7532280	1.9e-05	0.16	Muscle - Skeletal
ENSG00000116701.10	NCF2	1_183088868_G_C_b37	rs10911255	1.9e-05	-0.19	Skin - Not Sun Exposed (Suprapubic)
ENSG00000116701.10	NCF2	1_183584150_T_A_b37	rs12067848	1.9e-05	-0.12	Adipose - Subcutaneous
ENSG00000116701.10	NCF2	1_183644173_G_A_b37	rs12120000	1.9e-05	0.12	Adipose - Visceral (Omentum)
ENSG00000116701.10	NCF2	1_183647995_G_A_b37	rs12724273	1.9e-05	0.12	Adipose - Visceral (Omentum)
ENSG00000116701.10	NCF2	1_183090497_A_G_b37	rs2877984	1.9e-05	-0.19	Skin - Not Sun Exposed (Suprapubic)
ENSG00000116701.10	NCF2	1_183584285_G_A_b37	rs12062368	1.9e-05	-0.16	Muscle - Skeletal
ENSG00000116701.10	NCF2	1_183579123_C_G_b37	rs2761555	2e-05	-0.12	Adipose - Visceral (Omentum)
ENSG00000116701.10	NCF2	1_183582765_A_G_b37	rs61811180	2e-05	-0.16	Muscle - Skeletal
ENSG00000116701.10	NCF2	1_183582830_G_A_b37	rs61811181	2e-05	-0.16	Muscle - Skeletal
ENSG00000116701.10	NCF2	1_183583021_T_C_b37	rs111610865	2e-05	-0.16	Muscle - Skeletal
ENSG00000116701.10	NCF2	1_183584159_G_A_b37	rs12062320	2e-05	-0.16	Muscle - Skeletal
ENSG00000116701.10	NCF2	1_182978374_T_C_b37	rs9787228	2e-05	-0.19	Skin - Not Sun Exposed (Suprapubic)
ENSG00000116701.10	NCF2	1_183583950_C_T_b37	rs78070601	2e-05	-0.16	Muscle - Skeletal
ENSG00000116701.10	NCF2	1_183707595_A_C_b37	rs2491430	2e-05	0.39	Pituitary
ENSG00000116701.10	NCF2	1_183725852_C_G_b37	rs2491428	2e-05	0.39	Pituitary
ENSG00000116701.10	NCF2	1_183325722_C_T_b37	rs664422	2e-05	0.23	Artery - Tibial
ENSG00000116701.10	NCF2	1_183583937_A_C_b37	rs75705092	2e-05	-0.16	Muscle - Skeletal
ENSG00000116701.10	NCF2	1_182975100_T_C_b37	rs4652758	2e-05	-0.19	Skin - Not Sun Exposed (Suprapubic)
ENSG00000116701.10	NCF2	1_183458957_A_G_b37	rs3845460	2e-05	-0.28	Skin - Not Sun Exposed (Suprapubic)
ENSG00000116701.10	NCF2	1_183563457_C_T_b37	rs10797889	2e-05	-0.16	Muscle - Skeletal
ENSG00000116701.10	NCF2	1_183586973_G_C_b37	rs2761571	2e-05	-0.16	Muscle - Skeletal
ENSG00000116701.10	NCF2	1_183665652_C_G_b37	rs2148624	2e-05	-0.3	Cells - Transformed fibroblasts
ENSG00000116701.10	NCF2	1_183456476_C_T_b37	rs4652806	2e-05	-0.24	Artery - Tibial
ENSG00000116701.10	NCF2	1_183524850_A_AGAT_b37	rs397951870	2e-05	-0.24	Artery - Tibial
ENSG00000116701.10	NCF2	1_183584067_TTC_T_b37	rs113152065	2e-05	-0.16	Muscle - Skeletal
ENSG00000116701.10	NCF2	1_183579599_C_T_b37	rs2761557	2.1e-05	0.3	Cells - Transformed fibroblasts
ENSG00000116701.10	NCF2	1_183581822_C_T_b37	rs2761567	2.1e-05	0.3	Cells - Transformed fibroblasts
ENSG00000116701.10	NCF2	1_183584443_TCTCC_T_b37	rs57926010	2.1e-05	0.3	Cells - Transformed fibroblasts
ENSG00000116701.10	NCF2	1_183584455_CCCAGG_C_b37	rs57302350	2.1e-05	0.3	Cells - Transformed fibroblasts
ENSG00000116701.10	NCF2	1_183584462_TGC_T_b37	rs60704058	2.1e-05	0.3	Cells - Transformed fibroblasts
ENSG00000116701.10	NCF2	1_183583150_C_G_b37	rs75815911	2.1e-05	-0.12	Adipose - Subcutaneous
ENSG00000116701.10	NCF2	1_183324354_T_C_b37	rs681054	2.1e-05	0.23	Artery - Tibial
ENSG00000116701.10	NCF2	1_183628095_C_T_b37	rs7541678	2.1e-05	0.16	Muscle - Skeletal
ENSG00000116701.10	NCF2	1_183655833_G_A_b37	rs9650989	2.1e-05	-0.39	Pituitary
ENSG00000116701.10	NCF2	1_183656278_T_C_b37	rs6664058	2.1e-05	-0.39	Pituitary
ENSG00000116701.10	NCF2	1_183691923_C_G_b37	rs6699197	2.1e-05	0.16	Muscle - Skeletal
ENSG00000116701.10	NCF2	1_183576236_C_G_b37	rs2767306	2.1e-05	-0.12	Adipose - Subcutaneous
ENSG00000116701.10	NCF2	1_183696656_G_A_b37	rs6424909	2.1e-05	-0.38	Pituitary
ENSG00000116701.10	NCF2	1_183711823_G_A_b37	rs12401632	2.1e-05	-0.38	Artery - Tibial
ENSG00000116701.10	NCF2	1_183700152_A_G_b37	rs4087609	2.1e-05	0.11	Adipose - Subcutaneous
ENSG00000116701.10	NCF2	1_183725185_G_A_b37	rs12070290	2.1e-05	0.11	Adipose - Subcutaneous
ENSG00000116701.10	NCF2	1_183744893_G_A_b37	rs6676389	2.1e-05	-0.17	Esophagus - Mucosa
ENSG00000116701.10	NCF2	1_183755037_G_T_b37	rs10157741	2.1e-05	-0.17	Esophagus - Mucosa
ENSG00000116701.10	NCF2	1_183027216_T_C_b37	rs3934578	2.1e-05	-0.19	Skin - Not Sun Exposed (Suprapubic)
ENSG00000116701.10	NCF2	1_183335467_T_C_b37	rs502849	2.1e-05	0.24	Artery - Tibial
ENSG00000116701.10	NCF2	1_183338826_G_A_b37	rs2811559	2.1e-05	0.24	Artery - Tibial
ENSG00000116701.10	NCF2	1_183719759_TGGA_T_b37	rs367640092	2.1e-05	0.11	Adipose - Subcutaneous
ENSG00000116701.10	NCF2	1_183726404_A_G_b37	rs12737637	2.1e-05	0.11	Adipose - Subcutaneous
ENSG00000116701.10	NCF2	1_183738565_T_C_b37	rs1926835	2.1e-05	0.11	Adipose - Subcutaneous
ENSG00000116701.10	NCF2	1_183750249_T_C_b37	rs1926833	2.1e-05	0.11	Adipose - Subcutaneous
ENSG00000116701.10	NCF2	1_183752588_T_C_b37	rs10911436	2.1e-05	0.11	Adipose - Subcutaneous
ENSG00000116701.10	NCF2	1_183753930_A_T_b37	rs7519596	2.1e-05	0.11	Adipose - Subcutaneous
ENSG00000116701.10	NCF2	1_182977123_A_G_b37	rs9943229	2.2e-05	-0.19	Skin - Not Sun Exposed (Suprapubic)
ENSG00000116701.10	NCF2	1_183562932_C_T_b37	rs7556061	2.2e-05	-0.16	Muscle - Skeletal
ENSG00000116701.10	NCF2	1_183684569_G_A_b37	rs17559937	2.2e-05	0.16	Muscle - Skeletal
ENSG00000116701.10	NCF2	1_183579123_C_G_b37	rs2761555	2.2e-05	-0.16	Muscle - Skeletal
ENSG00000116701.10	NCF2	1_183737203_T_C_b37	rs6664373	2.2e-05	0.11	Adipose - Subcutaneous
ENSG00000116701.10	NCF2	1_183562517_A_C_b37	rs3754517	2.2e-05	-0.16	Muscle - Skeletal
ENSG00000116701.10	NCF2	1_183562603_T_C_b37	rs3754516	2.2e-05	-0.16	Muscle - Skeletal
ENSG00000116701.10	NCF2	1_183562782_C_A_b37	rs3754515	2.2e-05	-0.16	Muscle - Skeletal
ENSG00000116701.10	NCF2	1_183562888_A_G_b37	rs7533521	2.2e-05	-0.16	Muscle - Skeletal
ENSG00000116701.10	NCF2	1_183724561_T_C_b37	rs10797905	2.2e-05	-0.3	Cells - Transformed fibroblasts
ENSG00000116701.10	NCF2	1_183060072_T_A_b37	rs12078729	2.2e-05	-0.19	Skin - Not Sun Exposed (Suprapubic)
ENSG00000116701.10	NCF2	1_183584443_TCTCC_T_b37	rs57926010	2.2e-05	0.38	Pituitary
ENSG00000116701.10	NCF2	1_183584455_CCCAGG_C_b37	rs57302350	2.2e-05	0.38	Pituitary
ENSG00000116701.10	NCF2	1_183584462_TGC_T_b37	rs60704058	2.2e-05	0.38	Pituitary
ENSG00000116701.10	NCF2	1_183098417_G_A_b37	rs10737244	2.2e-05	-0.19	Skin - Not Sun Exposed (Suprapubic)
ENSG00000116701.10	NCF2	1_183581965_A_G_b37	rs2761569	2.2e-05	0.3	Cells - Transformed fibroblasts
ENSG00000116701.10	NCF2	1_183581976_C_T_b37	rs2478758	2.2e-05	0.3	Cells - Transformed fibroblasts
ENSG00000116701.10	NCF2	1_183562833_C_T_b37	rs3754514	2.2e-05	-0.16	Muscle - Skeletal
ENSG00000116701.10	NCF2	1_183101471_G_A_b37	rs12061219	2.2e-05	-0.19	Skin - Not Sun Exposed (Suprapubic)
ENSG00000116701.10	NCF2	1_183733752_T_C_b37	rs1926836	2.3e-05	-0.38	Pituitary
ENSG00000116701.10	NCF2	1_183515428_G_A_b37	rs2298083	2.3e-05	-0.28	Skin - Not Sun Exposed (Suprapubic)
ENSG00000116701.10	NCF2	1_183521510_ATTATTC_A_b37	rs71792397	2.3e-05	-0.28	Skin - Not Sun Exposed (Suprapubic)
ENSG00000116701.10	NCF2	1_182990834_T_C_b37	rs10752887	2.3e-05	-0.19	Skin - Not Sun Exposed (Suprapubic)
ENSG00000116701.10	NCF2	1_182982303_G_A_b37	rs4454510	2.3e-05	-0.19	Skin - Not Sun Exposed (Suprapubic)
ENSG00000116701.10	NCF2	1_183669380_T_C_b37	rs12133984	2.3e-05	0.12	Adipose - Visceral (Omentum)
ENSG00000116701.10	NCF2	1_182983832_G_C_b37	rs12403189	2.3e-05	-0.19	Skin - Not Sun Exposed (Suprapubic)
ENSG00000116701.10	NCF2	1_182979623_T_C_b37	rs10797808	2.3e-05	-0.19	Skin - Not Sun Exposed (Suprapubic)
ENSG00000116701.10	NCF2	1_182978873_T_C_b37	rs10797807	2.3e-05	-0.19	Skin - Not Sun Exposed (Suprapubic)
ENSG00000116701.10	NCF2	1_182979080_C_T_b37	rs10911190	2.3e-05	-0.19	Skin - Not Sun Exposed (Suprapubic)
ENSG00000116701.10	NCF2	1_182986592_T_C_b37	rs6424879	2.3e-05	-0.19	Skin - Not Sun Exposed (Suprapubic)
ENSG00000116701.10	NCF2	1_183669774_G_A_b37	rs12130947	2.3e-05	0.12	Adipose - Visceral (Omentum)
ENSG00000116701.10	NCF2	1_182974750_T_A_b37	rs4652757	2.3e-05	-0.19	Skin - Not Sun Exposed (Suprapubic)
ENSG00000116701.10	NCF2	1_182990263_A_ACT_b37	rs398069609	2.3e-05	-0.19	Skin - Not Sun Exposed (Suprapubic)
ENSG00000116701.10	NCF2	1_183030170_A_C_b37	rs10737239	2.3e-05	-0.19	Skin - Not Sun Exposed (Suprapubic)
ENSG00000116701.10	NCF2	1_182995608_A_G_b37	rs61081633	2.3e-05	-0.19	Skin - Not Sun Exposed (Suprapubic)
ENSG00000116701.10	NCF2	1_183496658_A_G_b37	rs2877978	2.3e-05	-0.24	Artery - Tibial
ENSG00000116701.10	NCF2	1_182981008_G_A_b37	rs10752884	2.3e-05	-0.19	Skin - Not Sun Exposed (Suprapubic)
ENSG00000116701.10	NCF2	1_182973491_A_G_b37	rs10752881	2.3e-05	-0.19	Skin - Not Sun Exposed (Suprapubic)
ENSG00000116701.10	NCF2	1_182974572_T_C_b37	rs8179361	2.3e-05	-0.19	Skin - Not Sun Exposed (Suprapubic)
ENSG00000116701.10	NCF2	1_182974598_C_G_b37	rs8179282	2.3e-05	-0.19	Skin - Not Sun Exposed (Suprapubic)
ENSG00000116701.10	NCF2	1_182976133_A_C_b37	rs4420053	2.3e-05	-0.19	Skin - Not Sun Exposed (Suprapubic)
ENSG00000116701.10	NCF2	1_182977197_C_T_b37	rs6701400	2.3e-05	-0.19	Skin - Not Sun Exposed (Suprapubic)
ENSG00000116701.10	NCF2	1_182977693_A_T_b37	rs10797803	2.3e-05	-0.19	Skin - Not Sun Exposed (Suprapubic)
ENSG00000116701.10	NCF2	1_182977733_T_C_b37	rs10797804	2.3e-05	-0.19	Skin - Not Sun Exposed (Suprapubic)
ENSG00000116701.10	NCF2	1_182978683_C_T_b37	rs10911189	2.3e-05	-0.19	Skin - Not Sun Exposed (Suprapubic)
ENSG00000116701.10	NCF2	1_182979308_TACCATAG_T_b37	rs71127332	2.3e-05	-0.19	Skin - Not Sun Exposed (Suprapubic)
ENSG00000116701.10	NCF2	1_182980016_ACC_A_b37	rs796916380	2.3e-05	-0.19	Skin - Not Sun Exposed (Suprapubic)
ENSG00000116701.10	NCF2	1_182980950_C_T_b37	rs10797810	2.3e-05	-0.19	Skin - Not Sun Exposed (Suprapubic)
ENSG00000116701.10	NCF2	1_182980963_G_A_b37	rs10752883	2.3e-05	-0.19	Skin - Not Sun Exposed (Suprapubic)
ENSG00000116701.10	NCF2	1_182982538_T_G_b37	rs4442336	2.3e-05	-0.19	Skin - Not Sun Exposed (Suprapubic)
ENSG00000116701.10	NCF2	1_182982597_TG_T_b37	rs869102094	2.3e-05	-0.19	Skin - Not Sun Exposed (Suprapubic)
ENSG00000116701.10	NCF2	1_182982878_G_C_b37	rs10752885	2.3e-05	-0.19	Skin - Not Sun Exposed (Suprapubic)
ENSG00000116701.10	NCF2	1_182983197_G_C_b37	rs6673559	2.3e-05	-0.19	Skin - Not Sun Exposed (Suprapubic)
ENSG00000116701.10	NCF2	1_182983635_GTCTT_G_b37	rs569531435	2.3e-05	-0.19	Skin - Not Sun Exposed (Suprapubic)
ENSG00000116701.10	NCF2	1_182984432_G_A_b37	rs10797811	2.3e-05	-0.19	Skin - Not Sun Exposed (Suprapubic)
ENSG00000116701.10	NCF2	1_182985440_CCTGACCTCCTGAT_C_b37	rs367668506	2.3e-05	-0.19	Skin - Not Sun Exposed (Suprapubic)
ENSG00000116701.10	NCF2	1_182985716_A_G_b37	rs12035773	2.3e-05	-0.19	Skin - Not Sun Exposed (Suprapubic)
ENSG00000116701.10	NCF2	1_182986441_G_A_b37	rs4402094	2.3e-05	-0.19	Skin - Not Sun Exposed (Suprapubic)
ENSG00000116701.10	NCF2	1_182987248_A_G_b37	rs10752886	2.3e-05	-0.19	Skin - Not Sun Exposed (Suprapubic)
ENSG00000116701.10	NCF2	1_182988252_A_G_b37	rs12133714	2.3e-05	-0.19	Skin - Not Sun Exposed (Suprapubic)
ENSG00000116701.10	NCF2	1_182988608_T_C_b37	rs10737236	2.3e-05	-0.19	Skin - Not Sun Exposed (Suprapubic)
ENSG00000116701.10	NCF2	1_182989949_T_A_b37	rs12132262	2.3e-05	-0.19	Skin - Not Sun Exposed (Suprapubic)
ENSG00000116701.10	NCF2	1_182991355_T_C_b37	rs6695746	2.3e-05	-0.19	Skin - Not Sun Exposed (Suprapubic)
ENSG00000116701.10	NCF2	1_182991417_A_G_b37	rs6658501	2.3e-05	-0.19	Skin - Not Sun Exposed (Suprapubic)
ENSG00000116701.10	NCF2	1_182991462_T_C_b37	rs6695837	2.3e-05	-0.19	Skin - Not Sun Exposed (Suprapubic)
ENSG00000116701.10	NCF2	1_182989269_A_G_b37	rs10737237	2.3e-05	-0.19	Skin - Not Sun Exposed (Suprapubic)
ENSG00000116701.10	NCF2	1_183679666_T_G_b37	rs35742190	2.3e-05	0.11	Adipose - Visceral (Omentum)
ENSG00000116701.10	NCF2	1_182984524_T_C_b37	rs10911191	2.3e-05	-0.19	Skin - Not Sun Exposed (Suprapubic)
ENSG00000116701.10	NCF2	1_182985581_G_A_b37	rs12028740	2.3e-05	-0.19	Skin - Not Sun Exposed (Suprapubic)
ENSG00000116701.10	NCF2	1_182988414_G_A_b37	rs12126434	2.3e-05	-0.19	Skin - Not Sun Exposed (Suprapubic)
ENSG00000116701.10	NCF2	1_182980011_A_C_b37	rs10752882	2.3e-05	-0.19	Skin - Not Sun Exposed (Suprapubic)
ENSG00000116701.10	NCF2	1_182986679_C_T_b37	rs6424880	2.3e-05	-0.19	Skin - Not Sun Exposed (Suprapubic)
ENSG00000116701.10	NCF2	1_182974879_A_AG_b37	rs397967214	2.3e-05	-0.19	Skin - Not Sun Exposed (Suprapubic)
ENSG00000116701.10	NCF2	1_182976028_A_G_b37	rs4575047	2.3e-05	-0.19	Skin - Not Sun Exposed (Suprapubic)
ENSG00000116701.10	NCF2	1_182989366_C_T_b37	rs10797813	2.3e-05	-0.19	Skin - Not Sun Exposed (Suprapubic)
ENSG00000116701.10	NCF2	1_183676791_C_G_b37	rs12117797	2.3e-05	0.12	Adipose - Visceral (Omentum)
ENSG00000116701.10	NCF2	1_182983333_A_C_b37	rs6697739	2.3e-05	-0.19	Skin - Not Sun Exposed (Suprapubic)
ENSG00000116701.10	NCF2	1_183741570_C_A_b37	rs7520591	2.3e-05	-0.17	Esophagus - Mucosa
ENSG00000116701.10	NCF2	1_183671399_C_G_b37	rs2148626	2.3e-05	0.12	Adipose - Visceral (Omentum)
ENSG00000116701.10	NCF2	1_183742384_A_G_b37	rs10752919	2.3e-05	-0.38	Pituitary
ENSG00000116701.10	NCF2	1_183017345_T_C_b37	rs6664995	2.3e-05	-0.19	Skin - Not Sun Exposed (Suprapubic)
ENSG00000116701.10	NCF2	1_183670800_G_A_b37	rs6663585	2.3e-05	0.12	Adipose - Visceral (Omentum)
ENSG00000116701.10	NCF2	1_183670811_T_C_b37	rs6424905	2.3e-05	0.12	Adipose - Visceral (Omentum)
ENSG00000116701.10	NCF2	1_183579123_C_G_b37	rs2761555	2.3e-05	-0.11	Adipose - Subcutaneous
ENSG00000116701.10	NCF2	1_183667369_G_A_b37	rs7553722	2.3e-05	0.12	Adipose - Visceral (Omentum)
ENSG00000116701.10	NCF2	1_183667858_G_A_b37	rs6701811	2.3e-05	0.12	Adipose - Visceral (Omentum)
ENSG00000116701.10	NCF2	1_183668806_G_A_b37	rs12753772	2.3e-05	0.12	Adipose - Visceral (Omentum)
ENSG00000116701.10	NCF2	1_183670012_A_G_b37	rs12138300	2.3e-05	0.12	Adipose - Visceral (Omentum)
ENSG00000116701.10	NCF2	1_183670529_A_G_b37	rs1926838	2.3e-05	0.12	Adipose - Visceral (Omentum)
ENSG00000116701.10	NCF2	1_183670577_A_G_b37	rs1926839	2.3e-05	0.12	Adipose - Visceral (Omentum)
ENSG00000116701.10	NCF2	1_183672052_T_C_b37	rs4517316	2.3e-05	0.12	Adipose - Visceral (Omentum)
ENSG00000116701.10	NCF2	1_183672085_A_G_b37	rs4607832	2.3e-05	0.12	Adipose - Visceral (Omentum)
ENSG00000116701.10	NCF2	1_183673327_T_C_b37	rs12729088	2.3e-05	0.12	Adipose - Visceral (Omentum)
ENSG00000116701.10	NCF2	1_183674297_T_C_b37	rs6689503	2.3e-05	0.12	Adipose - Visceral (Omentum)
ENSG00000116701.10	NCF2	1_183713733_C_A_b37	rs12738712	2.3e-05	0.11	Adipose - Subcutaneous
ENSG00000116701.10	NCF2	1_183670898_C_T_b37	rs6424906	2.3e-05	0.12	Adipose - Visceral (Omentum)
ENSG00000116701.10	NCF2	1_183720044_T_C_b37	rs10128040	2.3e-05	0.11	Adipose - Subcutaneous
ENSG00000116701.10	NCF2	1_183715906_G_T_b37	rs12064656	2.3e-05	-0.33	Artery - Tibial
ENSG00000116701.10	NCF2	1_183712545_G_T_b37	rs1926829	2.3e-05	-0.31	Nerve - Tibial
ENSG00000116701.10	NCF2	1_183586313_C_T_b37	rs200835529	2.3e-05	-0.11	Adipose - Subcutaneous
ENSG00000116701.10	NCF2	1_183606402_G_A_b37	rs59041516	2.3e-05	-0.4	Artery - Tibial
ENSG00000116701.10	NCF2	1_182952879_C_T_b37	rs6670811	2.3e-05	-0.26	Skin - Not Sun Exposed (Suprapubic)
ENSG00000116701.10	NCF2	1_183788902_T_A_b37	rs2500122	2.3e-05	-0.16	Skin - Sun Exposed (Lower leg)
ENSG00000116701.10	NCF2	1_183653691_A_G_b37	rs7520442	2.4e-05	0.12	Adipose - Visceral (Omentum)
ENSG00000116701.10	NCF2	1_183650380_C_G_b37	rs140224751	2.4e-05	0.12	Adipose - Visceral (Omentum)
ENSG00000116701.10	NCF2	1_183700590_C_A_b37	rs10752916	2.4e-05	0.16	Muscle - Skeletal
ENSG00000116701.10	NCF2	1_183700591_T_A_b37	rs10752917	2.4e-05	0.16	Muscle - Skeletal
ENSG00000116701.10	NCF2	1_183085696_A_G_b37	rs6424888	2.4e-05	-0.19	Skin - Not Sun Exposed (Suprapubic)
ENSG00000116701.10	NCF2	1_183085755_A_G_b37	rs20563	2.4e-05	-0.19	Skin - Not Sun Exposed (Suprapubic)
ENSG00000116701.10	NCF2	1_183086757_A_C_b37	rs2296292	2.4e-05	-0.19	Skin - Not Sun Exposed (Suprapubic)
ENSG00000116701.10	NCF2	1_183088013_T_A_b37	rs1547712	2.4e-05	-0.19	Skin - Not Sun Exposed (Suprapubic)
ENSG00000116701.10	NCF2	1_183088627_A_G_b37	rs10911254	2.4e-05	-0.19	Skin - Not Sun Exposed (Suprapubic)
ENSG00000116701.10	NCF2	1_183090057_C_T_b37	rs3768621	2.4e-05	-0.19	Skin - Not Sun Exposed (Suprapubic)
ENSG00000116701.10	NCF2	1_183584354_C_T_b37	rs12082958	2.4e-05	0.16	Esophagus - Mucosa
ENSG00000116701.10	NCF2	1_183088330_T_C_b37	rs2027083	2.4e-05	-0.19	Skin - Not Sun Exposed (Suprapubic)
ENSG00000116701.10	NCF2	1_183696656_G_A_b37	rs6424909	2.4e-05	-0.3	Cells - Transformed fibroblasts
ENSG00000116701.10	NCF2	1_183576552_T_C_b37	rs2767307	2.4e-05	-0.12	Adipose - Visceral (Omentum)
ENSG00000116701.10	NCF2	1_183042090_T_A_b37	rs6665685	2.4e-05	-0.19	Skin - Not Sun Exposed (Suprapubic)
ENSG00000116701.10	NCF2	1_183090265_T_A_b37	rs10752902	2.4e-05	-0.19	Skin - Not Sun Exposed (Suprapubic)
ENSG00000116701.10	NCF2	1_183568298_A_G_b37	rs59591433	2.4e-05	0.36	Pituitary
ENSG00000116701.10	NCF2	1_183576552_T_C_b37	rs2767307	2.4e-05	0.36	Pituitary
ENSG00000116701.10	NCF2	1_183718735_G_A_b37	rs12727643	2.5e-05	0.11	Adipose - Subcutaneous
ENSG00000116701.10	NCF2	1_183751640_T_C_b37	rs10911435	2.5e-05	0.11	Adipose - Subcutaneous
ENSG00000116701.10	NCF2	1_183718530_T_A_b37	rs6684415	2.5e-05	-0.38	Pituitary
ENSG00000116701.10	NCF2	1_183742384_A_G_b37	rs10752919	2.5e-05	-0.3	Cells - Transformed fibroblasts
ENSG00000116701.10	NCF2	1_183586973_G_C_b37	rs2761571	2.5e-05	0.16	Esophagus - Mucosa
ENSG00000116701.10	NCF2	1_183392810_C_T_b37	rs17486099	2.5e-05	0.2	Adipose - Visceral (Omentum)
ENSG00000116701.10	NCF2	1_183087485_A_T_b37	rs10797846	2.5e-05	-0.19	Skin - Not Sun Exposed (Suprapubic)
ENSG00000116701.10	NCF2	1_183581402_C_T_b37	rs2761565	2.5e-05	-0.12	Adipose - Subcutaneous
ENSG00000116701.10	NCF2	1_183116366_C_CTA_b37	rs144964313	2.5e-05	-0.51	Esophagus - Mucosa
ENSG00000116701.10	NCF2	1_183105324_C_T_b37	rs2296297	2.5e-05	-0.19	Skin - Not Sun Exposed (Suprapubic)
ENSG00000116701.10	NCF2	1_183697699_A_ATTGT_b37	rs397810926	2.5e-05	-0.38	Pituitary
ENSG00000116701.10	NCF2	1_183712506_C_CAAGAACTTCGA_b37	rs61514348	2.5e-05	-0.38	Pituitary
ENSG00000116701.10	NCF2	1_183718763_G_A_b37	rs6671886	2.5e-05	-0.38	Pituitary
ENSG00000116701.10	NCF2	1_183728476_C_G_b37	rs4132276	2.5e-05	-0.38	Pituitary
ENSG00000116701.10	NCF2	1_183729184_C_CA_b37	rs34531055	2.5e-05	-0.38	Pituitary
ENSG00000116701.10	NCF2	1_183729186_C_T_b37	rs35039854	2.5e-05	-0.38	Pituitary
ENSG00000116701.10	NCF2	1_183731104_A_T_b37	rs6673095	2.5e-05	-0.38	Pituitary
ENSG00000116701.10	NCF2	1_183736732_G_A_b37	rs6666992	2.5e-05	-0.38	Pituitary
ENSG00000116701.10	NCF2	1_183751004_C_T_b37	rs10797910	2.5e-05	-0.38	Pituitary
ENSG00000116701.10	NCF2	1_183754706_T_C_b37	rs1952234	2.5e-05	-0.38	Pituitary
ENSG00000116701.10	NCF2	1_183667064_T_G_b37	rs4497174	2.5e-05	-0.37	Pituitary
ENSG00000116701.10	NCF2	1_183612717_C_T_b37	rs1174689	2.6e-05	0.37	Pituitary
ENSG00000116701.10	NCF2	1_183690371_G_A_b37	rs1926825	2.6e-05	-0.3	Cells - Transformed fibroblasts
ENSG00000116701.10	NCF2	1_183667100_A_G_b37	rs4638079	2.6e-05	0.17	Muscle - Skeletal
ENSG00000116701.10	NCF2	1_183609654_A_G_b37	rs1174687	2.6e-05	-0.12	Adipose - Visceral (Omentum)
ENSG00000116701.10	NCF2	1_183739363_C_T_b37	rs1926834	2.6e-05	0.11	Adipose - Subcutaneous
ENSG00000116701.10	NCF2	1_183584354_C_T_b37	rs12082958	2.6e-05	-0.16	Muscle - Skeletal
ENSG00000116701.10	NCF2	1_183627616_C_T_b37	rs1177778	2.6e-05	0.28	Cells - Transformed fibroblasts
ENSG00000116701.10	NCF2	1_183374722_C_T_b37	rs10732975	2.6e-05	0.24	Artery - Tibial
ENSG00000116701.10	NCF2	1_183679666_T_G_b37	rs35742190	2.6e-05	0.15	Muscle - Skeletal
ENSG00000116701.10	NCF2	1_183668132_A_G_b37	rs6424904	2.6e-05	0.17	Muscle - Skeletal
ENSG00000116701.10	NCF2	1_183517524_T_C_b37	rs116564792	2.6e-05	-0.52	Esophagus - Mucosa
ENSG00000116701.10	NCF2	1_183528443_A_C_b37	rs34192123	2.6e-05	-0.52	Esophagus - Mucosa
ENSG00000116701.10	NCF2	1_183792638_A_G_b37	rs10911444	2.6e-05	-0.18	Skin - Sun Exposed (Lower leg)
ENSG00000116701.10	NCF2	1_183151895_C_A_b37	rs12024055	2.6e-05	-0.26	Skin - Sun Exposed (Lower leg)
ENSG00000116701.10	NCF2	1_183627623_T_C_b37	rs1174664	2.7e-05	0.28	Cells - Transformed fibroblasts
ENSG00000116701.10	NCF2	1_183289523_G_A_b37	rs640877	2.7e-05	-0.22	Skin - Not Sun Exposed (Suprapubic)
ENSG00000116701.10	NCF2	1_183289554_C_T_b37	rs549337	2.7e-05	-0.22	Skin - Not Sun Exposed (Suprapubic)
ENSG00000116701.10	NCF2	1_183302111_T_C_b37	rs675220	2.7e-05	-0.22	Skin - Not Sun Exposed (Suprapubic)
ENSG00000116701.10	NCF2	1_183302445_T_C_b37	rs577623	2.7e-05	-0.22	Skin - Not Sun Exposed (Suprapubic)
ENSG00000116701.10	NCF2	1_183302490_T_C_b37	rs677002	2.7e-05	-0.22	Skin - Not Sun Exposed (Suprapubic)
ENSG00000116701.10	NCF2	1_183302788_G_GT_b37	rs397817286	2.7e-05	-0.22	Skin - Not Sun Exposed (Suprapubic)
ENSG00000116701.10	NCF2	1_183302891_TAACTC_T_b37	rs61289663	2.7e-05	-0.22	Skin - Not Sun Exposed (Suprapubic)
ENSG00000116701.10	NCF2	1_183302979_T_C_b37	rs581606	2.7e-05	-0.22	Skin - Not Sun Exposed (Suprapubic)
ENSG00000116701.10	NCF2	1_183677511_C_T_b37	rs10911420	2.7e-05	-0.37	Pituitary
ENSG00000116701.10	NCF2	1_183595037_G_A_b37	rs2761574	2.7e-05	0.28	Cells - Transformed fibroblasts
ENSG00000116701.10	NCF2	1_183704768_T_G_b37	rs12119590	2.7e-05	0.16	Muscle - Skeletal
ENSG00000116701.10	NCF2	1_182978609_G_A_b37	rs10797806	2.7e-05	-0.19	Skin - Not Sun Exposed (Suprapubic)
ENSG00000116701.10	NCF2	1_183098280_G_A_b37	rs10737243	2.7e-05	-0.19	Skin - Not Sun Exposed (Suprapubic)
ENSG00000116701.10	NCF2	1_183718836_G_A_b37	rs6671911	2.7e-05	-0.31	Nerve - Tibial
ENSG00000116701.10	NCF2	1_183746262_G_A_b37	rs13375745	2.7e-05	-0.3	Nerve - Tibial
ENSG00000116701.10	NCF2	1_183717696_A_G_b37	rs11805639	2.8e-05	-0.3	Nerve - Tibial
ENSG00000116701.10	NCF2	1_183725087_C_T_b37	rs12090437	2.8e-05	0.11	Adipose - Subcutaneous
ENSG00000116701.10	NCF2	1_183724633_T_C_b37	rs12129521	2.8e-05	0.11	Adipose - Subcutaneous
ENSG00000116701.10	NCF2	1_183685947_G_A_b37	rs6424907	2.8e-05	-0.38	Pituitary
ENSG00000116701.10	NCF2	1_182975329_G_A_b37	rs113153546	2.8e-05	-0.2	Skin - Not Sun Exposed (Suprapubic)
ENSG00000116701.10	NCF2	1_183583960_G_A_b37	rs74862432	2.8e-05	0.29	Cells - Transformed fibroblasts
ENSG00000116701.10	NCF2	1_183700521_G_A_b37	rs10752915	2.8e-05	0.11	Adipose - Subcutaneous
ENSG00000116701.10	NCF2	1_183566431_A_G_b37	rs10797893	2.8e-05	-0.27	Esophagus - Mucosa
ENSG00000116701.10	NCF2	1_183586313_C_T_b37	rs200835529	2.8e-05	-0.12	Adipose - Visceral (Omentum)
ENSG00000116701.10	NCF2	1_183714508_T_A_b37	rs34484934	2.8e-05	0.15	Muscle - Skeletal
ENSG00000116701.10	NCF2	1_183714509_GT_G_b37	rs869277201	2.8e-05	0.15	Muscle - Skeletal
ENSG00000116701.10	NCF2	1_183576236_C_G_b37	rs2767306	2.8e-05	-0.12	Adipose - Visceral (Omentum)
ENSG00000116701.10	NCF2	1_183024704_C_T_b37	rs10911213	2.8e-05	-0.19	Skin - Not Sun Exposed (Suprapubic)
ENSG00000116701.10	NCF2	1_183738892_G_T_b37	rs10911432	2.8e-05	0.12	Adipose - Visceral (Omentum)
ENSG00000116701.10	NCF2	1_183606402_G_A_b37	rs59041516	2.8e-05	-0.36	Nerve - Tibial
ENSG00000116701.10	NCF2	1_183590912_G_A_b37	rs2767301	2.8e-05	0.28	Cells - Transformed fibroblasts
ENSG00000116701.10	NCF2	1_183592416_G_T_b37	rs2761573	2.8e-05	0.28	Cells - Transformed fibroblasts
ENSG00000116701.10	NCF2	1_183704015_T_C_b37	rs4146996	2.9e-05	-0.38	Pituitary
ENSG00000116701.10	NCF2	1_183717696_A_G_b37	rs11805639	2.9e-05	-0.25	Skin - Sun Exposed (Lower leg)
ENSG00000116701.10	NCF2	1_182999136_G_T_b37	rs10797817	2.9e-05	-0.19	Skin - Not Sun Exposed (Suprapubic)
ENSG00000116701.10	NCF2	1_183084607_A_G_b37	rs3736888	2.9e-05	-0.19	Skin - Not Sun Exposed (Suprapubic)
ENSG00000116701.10	NCF2	1_183084608_C_A_b37	rs2027082	2.9e-05	-0.19	Skin - Not Sun Exposed (Suprapubic)
ENSG00000116701.10	NCF2	1_183036816_A_G_b37	rs10797831	2.9e-05	-0.19	Skin - Not Sun Exposed (Suprapubic)
ENSG00000116701.10	NCF2	1_183017769_A_G_b37	rs10797822	2.9e-05	-0.19	Skin - Not Sun Exposed (Suprapubic)
ENSG00000116701.10	NCF2	1_183048749_T_G_b37	rs10797834	2.9e-05	-0.19	Skin - Not Sun Exposed (Suprapubic)
ENSG00000116701.10	NCF2	1_182996422_A_ACT_b37	rs113711531	2.9e-05	-0.19	Skin - Not Sun Exposed (Suprapubic)
ENSG00000116701.10	NCF2	1_183051118_A_C_b37	rs10911230	2.9e-05	-0.19	Skin - Not Sun Exposed (Suprapubic)
ENSG00000116701.10	NCF2	1_182993751_A_G_b37	rs10752888	2.9e-05	-0.19	Skin - Not Sun Exposed (Suprapubic)
ENSG00000116701.10	NCF2	1_182993960_T_C_b37	rs4652762	2.9e-05	-0.19	Skin - Not Sun Exposed (Suprapubic)
ENSG00000116701.10	NCF2	1_182994084_A_G_b37	rs4652763	2.9e-05	-0.19	Skin - Not Sun Exposed (Suprapubic)
ENSG00000116701.10	NCF2	1_182994115_G_A_b37	rs4652764	2.9e-05	-0.19	Skin - Not Sun Exposed (Suprapubic)
ENSG00000116701.10	NCF2	1_182994147_C_T_b37	rs4652765	2.9e-05	-0.19	Skin - Not Sun Exposed (Suprapubic)
ENSG00000116701.10	NCF2	1_182994280_TC_T_b37	rs11322326	2.9e-05	-0.19	Skin - Not Sun Exposed (Suprapubic)
ENSG00000116701.10	NCF2	1_182994300_T_C_b37	rs4651137	2.9e-05	-0.19	Skin - Not Sun Exposed (Suprapubic)
ENSG00000116701.10	NCF2	1_183000041_G_T_b37	rs12037585	2.9e-05	-0.19	Skin - Not Sun Exposed (Suprapubic)
ENSG00000116701.10	NCF2	1_183002483_G_C_b37	rs4652767	2.9e-05	-0.19	Skin - Not Sun Exposed (Suprapubic)
ENSG00000116701.10	NCF2	1_183003436_C_T_b37	rs10752889	2.9e-05	-0.19	Skin - Not Sun Exposed (Suprapubic)
ENSG00000116701.10	NCF2	1_183003652_C_T_b37	rs6657533	2.9e-05	-0.19	Skin - Not Sun Exposed (Suprapubic)
ENSG00000116701.10	NCF2	1_183004547_C_T_b37	rs4129857	2.9e-05	-0.19	Skin - Not Sun Exposed (Suprapubic)
ENSG00000116701.10	NCF2	1_183006480_G_GT_b37	rs397744824	2.9e-05	-0.19	Skin - Not Sun Exposed (Suprapubic)
ENSG00000116701.10	NCF2	1_183006911_A_G_b37	rs10797819	2.9e-05	-0.19	Skin - Not Sun Exposed (Suprapubic)
ENSG00000116701.10	NCF2	1_183007691_T_TCCC_b37	rs34812197	2.9e-05	-0.19	Skin - Not Sun Exposed (Suprapubic)
ENSG00000116701.10	NCF2	1_183020762_G_A_b37	rs4422969	2.9e-05	-0.19	Skin - Not Sun Exposed (Suprapubic)
ENSG00000116701.10	NCF2	1_183023503_G_A_b37	rs4652771	2.9e-05	-0.19	Skin - Not Sun Exposed (Suprapubic)
ENSG00000116701.10	NCF2	1_183023696_G_C_b37	rs4652772	2.9e-05	-0.19	Skin - Not Sun Exposed (Suprapubic)
ENSG00000116701.10	NCF2	1_183024469_C_T_b37	rs10911212	2.9e-05	-0.19	Skin - Not Sun Exposed (Suprapubic)
ENSG00000116701.10	NCF2	1_183025898_C_T_b37	rs10732271	2.9e-05	-0.19	Skin - Not Sun Exposed (Suprapubic)
ENSG00000116701.10	NCF2	1_183027432_G_A_b37	rs3934579	2.9e-05	-0.19	Skin - Not Sun Exposed (Suprapubic)
ENSG00000116701.10	NCF2	1_183028855_C_T_b37	rs4072709	2.9e-05	-0.19	Skin - Not Sun Exposed (Suprapubic)
ENSG00000116701.10	NCF2	1_183028970_C_T_b37	rs3935384	2.9e-05	-0.19	Skin - Not Sun Exposed (Suprapubic)
ENSG00000116701.10	NCF2	1_183032447_C_CTAAG_b37	rs56677963	2.9e-05	-0.19	Skin - Not Sun Exposed (Suprapubic)
ENSG00000116701.10	NCF2	1_183047363_G_A_b37	rs10911222	2.9e-05	-0.19	Skin - Not Sun Exposed (Suprapubic)
ENSG00000116701.10	NCF2	1_183050368_C_G_b37	rs10911229	2.9e-05	-0.19	Skin - Not Sun Exposed (Suprapubic)
ENSG00000116701.10	NCF2	1_183051502_A_C_b37	rs35782443	2.9e-05	-0.19	Skin - Not Sun Exposed (Suprapubic)
ENSG00000116701.10	NCF2	1_183051614_C_T_b37	rs12082051	2.9e-05	-0.19	Skin - Not Sun Exposed (Suprapubic)
ENSG00000116701.10	NCF2	1_183051745_T_A_b37	rs10911231	2.9e-05	-0.19	Skin - Not Sun Exposed (Suprapubic)
ENSG00000116701.10	NCF2	1_183053746_G_A_b37	rs10911235	2.9e-05	-0.19	Skin - Not Sun Exposed (Suprapubic)
ENSG00000116701.10	NCF2	1_183055398_T_G_b37	rs2151669	2.9e-05	-0.19	Skin - Not Sun Exposed (Suprapubic)
ENSG00000116701.10	NCF2	1_182993025_C_T_b37	rs10911194	2.9e-05	-0.19	Skin - Not Sun Exposed (Suprapubic)
ENSG00000116701.10	NCF2	1_183018857_T_C_b37	rs6668980	2.9e-05	-0.19	Skin - Not Sun Exposed (Suprapubic)
ENSG00000116701.10	NCF2	1_182994336_A_G_b37	rs4652766	2.9e-05	-0.19	Skin - Not Sun Exposed (Suprapubic)
ENSG00000116701.10	NCF2	1_183023283_G_A_b37	rs10752891	2.9e-05	-0.19	Skin - Not Sun Exposed (Suprapubic)
ENSG00000116701.10	NCF2	1_182995233_G_A_b37	rs10911196	2.9e-05	-0.19	Skin - Not Sun Exposed (Suprapubic)
ENSG00000116701.10	NCF2	1_183668030_T_C_b37	rs6424903	2.9e-05	0.17	Muscle - Skeletal
ENSG00000116701.10	NCF2	1_183668033_C_T_b37	rs6704283	2.9e-05	0.17	Muscle - Skeletal
ENSG00000116701.10	NCF2	1_183531938_G_A_b37	rs12405210	2.9e-05	-0.28	Skin - Not Sun Exposed (Suprapubic)
ENSG00000116701.10	NCF2	1_183050087_G_A_b37	rs12128323	2.9e-05	-0.19	Skin - Not Sun Exposed (Suprapubic)
ENSG00000116701.10	NCF2	1_183031641_T_G_b37	rs7547953	2.9e-05	-0.19	Skin - Not Sun Exposed (Suprapubic)
ENSG00000116701.10	NCF2	1_183036055_A_G_b37	rs10752892	2.9e-05	-0.19	Skin - Not Sun Exposed (Suprapubic)
ENSG00000116701.10	NCF2	1_183027512_A_G_b37	rs3934697	2.9e-05	-0.19	Skin - Not Sun Exposed (Suprapubic)
ENSG00000116701.10	NCF2	1_183724611_G_A_b37	rs10911430	2.9e-05	0.11	Adipose - Subcutaneous
ENSG00000116701.10	NCF2	1_183036274_A_T_b37	rs10797830	2.9e-05	-0.19	Skin - Not Sun Exposed (Suprapubic)
ENSG00000116701.10	NCF2	1_183711483_C_T_b37	rs3820689	2.9e-05	0.11	Adipose - Subcutaneous
ENSG00000116701.10	NCF2	1_183057933_G_A_b37	rs2027086	2.9e-05	-0.19	Skin - Not Sun Exposed (Suprapubic)
ENSG00000116701.10	NCF2	1_183736952_G_A_b37	rs77461455	2.9e-05	-0.3	Nerve - Tibial
ENSG00000116701.10	NCF2	1_183749506_G_A_b37	rs2148623	2.9e-05	-0.3	Nerve - Tibial
ENSG00000116701.10	NCF2	1_183033228_A_G_b37	rs10797829	3e-05	-0.19	Skin - Not Sun Exposed (Suprapubic)
ENSG00000116701.10	NCF2	1_183094322_C_T_b37	rs2093985	3e-05	-0.19	Skin - Not Sun Exposed (Suprapubic)
ENSG00000116701.10	NCF2	1_183081015_G_C_b37	rs10911250	3e-05	-0.19	Skin - Not Sun Exposed (Suprapubic)
ENSG00000116701.10	NCF2	1_183562264_A_AAGTCTTAGCACCTCAGAT_b37	rs369465356	3e-05	-0.16	Muscle - Skeletal
ENSG00000116701.10	NCF2	1_183628095_C_T_b37	rs7541678	3e-05	0.11	Adipose - Subcutaneous
ENSG00000116701.10	NCF2	1_183586240_A_T_b37	rs114063887	3e-05	0.17	Esophagus - Mucosa
ENSG00000116701.10	NCF2	1_183700590_C_A_b37	rs10752916	3e-05	0.11	Adipose - Subcutaneous
ENSG00000116701.10	NCF2	1_183700591_T_A_b37	rs10752917	3e-05	0.11	Adipose - Subcutaneous
ENSG00000116701.10	NCF2	1_183626523_C_G_b37	rs1174663	3e-05	0.39	Pituitary
ENSG00000116701.10	NCF2	1_183463271_C_T_b37	rs11587738	3e-05	-0.23	Artery - Tibial
ENSG00000116701.10	NCF2	1_183606747_C_A_b37	rs1174686	3e-05	0.38	Pituitary
ENSG00000116701.10	NCF2	1_183639879_G_T_b37	rs1174675	3e-05	0.28	Cells - Transformed fibroblasts
ENSG00000116701.10	NCF2	1_183671385_G_A_b37	rs2148625	3.1e-05	0.11	Adipose - Visceral (Omentum)
ENSG00000116701.10	NCF2	1_183702926_G_A_b37	rs7525146	3.1e-05	0.11	Adipose - Subcutaneous
ENSG00000116701.10	NCF2	1_183792288_T_C_b37	rs10911443	3.1e-05	-0.18	Skin - Sun Exposed (Lower leg)
ENSG00000116701.10	NCF2	1_183793296_A_G_b37	rs4278339	3.1e-05	-0.18	Skin - Sun Exposed (Lower leg)
ENSG00000116701.10	NCF2	1_183583164_C_T_b37	rs377482073	3.1e-05	-0.16	Muscle - Skeletal
ENSG00000116701.10	NCF2	1_182997761_T_C_b37	rs5022057	3.1e-05	-0.19	Skin - Not Sun Exposed (Suprapubic)
ENSG00000116701.10	NCF2	1_183696240_C_A_b37	rs56402527	3.1e-05	0.16	Muscle - Skeletal
ENSG00000116701.10	NCF2	1_183566100_C_T_b37	rs2333686	3.1e-05	0.16	Esophagus - Mucosa
ENSG00000116701.10	NCF2	1_182978459_A_G_b37	rs9787327	3.1e-05	-0.2	Skin - Not Sun Exposed (Suprapubic)
ENSG00000116701.10	NCF2	1_183705975_G_T_b37	rs9645305	3.2e-05	-0.38	Pituitary
ENSG00000116701.10	NCF2	1_183058898_G_A_b37	rs6672306	3.2e-05	-0.19	Skin - Not Sun Exposed (Suprapubic)
ENSG00000116701.10	NCF2	1_183671283_A_G_b37	rs7543703	3.2e-05	0.11	Adipose - Visceral (Omentum)
ENSG00000116701.10	NCF2	1_183736556_T_C_b37	rs6679538	3.2e-05	-0.38	Pituitary
ENSG00000116701.10	NCF2	1_183712775_T_G_b37	rs1887245	3.2e-05	0.11	Adipose - Subcutaneous
ENSG00000116701.10	NCF2	1_183442324_A_C_b37	rs78517564	3.2e-05	-0.3	Skin - Not Sun Exposed (Suprapubic)
ENSG00000116701.10	NCF2	1_183468420_T_G_b37	rs10911346	3.2e-05	-0.3	Skin - Not Sun Exposed (Suprapubic)
ENSG00000116701.10	NCF2	1_182997318_G_T_b37	rs10911198	3.2e-05	-0.19	Skin - Not Sun Exposed (Suprapubic)
ENSG00000116701.10	NCF2	1_183669720_A_G_b37	rs12138213	3.2e-05	0.11	Adipose - Subcutaneous
ENSG00000116701.10	NCF2	1_183596136_A_G_b37	rs11755	3.2e-05	-0.11	Adipose - Subcutaneous
ENSG00000116701.10	NCF2	1_183011366_G_A_b37	rs10797820	3.2e-05	-0.19	Skin - Not Sun Exposed (Suprapubic)
ENSG00000116701.10	NCF2	1_183012559_G_A_b37	rs10797821	3.2e-05	-0.19	Skin - Not Sun Exposed (Suprapubic)
ENSG00000116701.10	NCF2	1_183586330_C_T_b37	rs368090357	3.2e-05	-0.16	Muscle - Skeletal
ENSG00000116701.10	NCF2	1_183681738_G_C_b37	rs1887246	3.2e-05	0.11	Adipose - Subcutaneous
ENSG00000116701.10	NCF2	1_183012423_A_G_b37	rs10911206	3.2e-05	-0.19	Skin - Not Sun Exposed (Suprapubic)
ENSG00000116701.10	NCF2	1_182984597_G_A_b37	rs10797812	3.2e-05	-0.19	Skin - Not Sun Exposed (Suprapubic)
ENSG00000116701.10	NCF2	1_183565989_T_C_b37	rs2333685	3.2e-05	0.16	Esophagus - Mucosa
ENSG00000116701.10	NCF2	1_183667957_C_G_b37	rs6424902	3.3e-05	0.17	Muscle - Skeletal
ENSG00000116701.10	NCF2	1_183566913_C_T_b37	rs41439047	3.3e-05	0.3	Cells - Transformed fibroblasts
ENSG00000116701.10	NCF2	1_183570545_G_T_b37	rs10489762	3.3e-05	0.3	Cells - Transformed fibroblasts
ENSG00000116701.10	NCF2	1_183714868_GT_G_b37	rs141349113	3.3e-05	-0.51	Artery - Tibial
ENSG00000116701.10	NCF2	1_183339985_T_C_b37	rs525138	3.3e-05	0.25	Artery - Tibial
ENSG00000116701.10	NCF2	1_183558996_G_A_b37	rs34110768	3.3e-05	-0.37	Nerve - Tibial
ENSG00000116701.10	NCF2	1_183419531_AT_A_b37	rs796455706	3.3e-05	-0.22	Artery - Tibial
ENSG00000116701.10	NCF2	1_183581038_G_T_b37	rs2476571	3.3e-05	-0.16	Muscle - Skeletal
ENSG00000116701.10	NCF2	1_183136204_A_G_b37	rs6673478	3.4e-05	-0.36	Nerve - Tibial
ENSG00000116701.10	NCF2	1_183143767_G_A_b37	rs11807901	3.4e-05	-0.36	Nerve - Tibial
ENSG00000116701.10	NCF2	1_183100863_A_G_b37	rs10752903	3.4e-05	-0.19	Skin - Not Sun Exposed (Suprapubic)
ENSG00000116701.10	NCF2	1_183074083_G_C_b37	rs10797836	3.4e-05	-0.19	Skin - Not Sun Exposed (Suprapubic)
ENSG00000116701.10	NCF2	1_183567132_C_T_b37	rs41263646	3.4e-05	-0.37	Nerve - Tibial
ENSG00000116701.10	NCF2	1_183715525_G_A_b37	rs2182594	3.4e-05	0.11	Adipose - Subcutaneous
ENSG00000116701.10	NCF2	1_183136337_A_C_b37	rs6673606	3.4e-05	-0.36	Nerve - Tibial
ENSG00000116701.10	NCF2	1_183555779_C_T_b37	rs11578964	3.4e-05	-0.16	Muscle - Skeletal
ENSG00000116701.10	NCF2	1_183634330_C_T_b37	rs1174672	3.4e-05	0.28	Cells - Transformed fibroblasts
ENSG00000116701.10	NCF2	1_183502233_AT_A_b37	rs796659101	3.4e-05	-0.27	Skin - Not Sun Exposed (Suprapubic)
ENSG00000116701.10	NCF2	1_183078712_G_T_b37	rs3768625	3.4e-05	-0.19	Skin - Not Sun Exposed (Suprapubic)
ENSG00000116701.10	NCF2	1_183667064_T_G_b37	rs4497174	3.4e-05	-0.29	Cells - Transformed fibroblasts
ENSG00000116701.10	NCF2	1_183100598_T_G_b37	rs4047797	3.4e-05	-0.19	Skin - Not Sun Exposed (Suprapubic)
ENSG00000116701.10	NCF2	1_183586329_G_A_b37	rs375178930	3.4e-05	-0.16	Muscle - Skeletal
ENSG00000116701.10	NCF2	1_183555370_A_G_b37	rs35049461	3.4e-05	-0.17	Muscle - Skeletal
ENSG00000116701.10	NCF2	1_183555373_C_G_b37	rs34715440	3.4e-05	-0.17	Muscle - Skeletal
ENSG00000116701.10	NCF2	1_183712775_T_G_b37	rs1887245	3.5e-05	0.15	Muscle - Skeletal
ENSG00000116701.10	NCF2	1_183517524_T_C_b37	rs116564792	3.5e-05	-0.62	Skin - Not Sun Exposed (Suprapubic)
ENSG00000116701.10	NCF2	1_183528443_A_C_b37	rs34192123	3.5e-05	-0.62	Skin - Not Sun Exposed (Suprapubic)
ENSG00000116701.10	NCF2	1_182982173_T_A_b37	rs4487994	3.5e-05	-0.18	Skin - Not Sun Exposed (Suprapubic)
ENSG00000116701.10	NCF2	1_182990929_C_A_b37	rs10797814	3.5e-05	-0.18	Skin - Not Sun Exposed (Suprapubic)
ENSG00000116701.10	NCF2	1_182977327_G_A_b37	rs6701679	3.5e-05	-0.18	Skin - Not Sun Exposed (Suprapubic)
ENSG00000116701.10	NCF2	1_183164062_G_C_b37	rs3820695	3.5e-05	-0.31	Nerve - Tibial
ENSG00000116701.10	NCF2	1_183275147_G_A_b37	rs60404994	3.5e-05	-0.3	Skin - Sun Exposed (Lower leg)
ENSG00000116701.10	NCF2	1_183792230_C_T_b37	rs12137046	3.5e-05	-0.18	Skin - Sun Exposed (Lower leg)
ENSG00000116701.10	NCF2	1_183083266_G_A_b37	rs3768623	3.6e-05	-0.19	Skin - Not Sun Exposed (Suprapubic)
ENSG00000116701.10	NCF2	1_183587440_C_T_b37	rs2478761	3.6e-05	0.16	Esophagus - Mucosa
ENSG00000116701.10	NCF2	1_183586265_C_T_b37	rs201591467	3.6e-05	0.16	Esophagus - Mucosa
ENSG00000116701.10	NCF2	1_182976034_C_T_b37	rs4596846	3.6e-05	-0.18	Skin - Not Sun Exposed (Suprapubic)
ENSG00000116701.10	NCF2	1_183685947_G_A_b37	rs6424907	3.7e-05	-0.29	Cells - Transformed fibroblasts
ENSG00000116701.10	NCF2	1_183704015_T_C_b37	rs4146996	3.7e-05	-0.29	Cells - Transformed fibroblasts
ENSG00000116701.10	NCF2	1_183625210_A_G_b37	rs1174662	3.7e-05	0.3	Cells - Transformed fibroblasts
ENSG00000116701.10	NCF2	1_183579911_A_G_b37	rs2767312	3.7e-05	-0.16	Muscle - Skeletal
ENSG00000116701.10	NCF2	1_183024581_G_A_b37	rs10797825	3.7e-05	-0.19	Skin - Not Sun Exposed (Suprapubic)
ENSG00000116701.10	NCF2	1_183796618_T_C_b37	rs12131255	3.7e-05	-0.17	Skin - Sun Exposed (Lower leg)
ENSG00000116701.10	NCF2	1_183565797_G_A_b37	rs2333684	3.7e-05	0.16	Esophagus - Mucosa
ENSG00000116701.10	NCF2	1_183094210_T_C_b37	rs2093983	3.7e-05	-0.19	Skin - Not Sun Exposed (Suprapubic)
ENSG00000116701.10	NCF2	1_183555454_A_C_b37	rs35304105	3.7e-05	0.17	Esophagus - Mucosa
ENSG00000116701.10	NCF2	1_183074567_CA_C_b37	rs869111216	3.8e-05	-0.19	Skin - Not Sun Exposed (Suprapubic)
ENSG00000116701.10	NCF2	1_183074576_A_G_b37	rs2027081	3.8e-05	-0.19	Skin - Not Sun Exposed (Suprapubic)
ENSG00000116701.10	NCF2	1_183705589_T_C_b37	rs12120527	3.8e-05	0.11	Adipose - Subcutaneous
ENSG00000116701.10	NCF2	1_183080924_A_AC_b37	rs34391308	3.8e-05	-0.19	Skin - Not Sun Exposed (Suprapubic)
ENSG00000116701.10	NCF2	1_183581960_A_G_b37	rs2761568	3.8e-05	-0.16	Muscle - Skeletal
ENSG00000116701.10	NCF2	1_183616926_T_C_b37	rs1174657	3.8e-05	0.28	Cells - Transformed fibroblasts
ENSG00000116701.10	NCF2	1_183617105_A_G_b37	rs1174658	3.8e-05	0.28	Cells - Transformed fibroblasts
ENSG00000116701.10	NCF2	1_183702071_G_C_b37	rs10911426	3.8e-05	0.11	Adipose - Subcutaneous
ENSG00000116701.10	NCF2	1_183702455_T_A_b37	rs7536447	3.8e-05	0.11	Adipose - Subcutaneous
ENSG00000116701.10	NCF2	1_183710374_A_T_b37	rs4489521	3.8e-05	0.15	Muscle - Skeletal
ENSG00000116701.10	NCF2	1_183579726_TG_T_b37	rs796140731	3.8e-05	-0.16	Muscle - Skeletal
ENSG00000116701.10	NCF2	1_183580427_C_T_b37	rs2767313	3.8e-05	-0.16	Muscle - Skeletal
ENSG00000116701.10	NCF2	1_183330737_TAA_T_b37	rs35275295	3.8e-05	0.23	Artery - Tibial
ENSG00000116701.10	NCF2	1_183579379_G_A_b37	rs2761556	3.8e-05	-0.16	Muscle - Skeletal
ENSG00000116701.10	NCF2	1_183579585_T_A_b37	rs2767311	3.8e-05	-0.16	Muscle - Skeletal
ENSG00000116701.10	NCF2	1_183579973_C_T_b37	rs2761558	3.8e-05	-0.16	Muscle - Skeletal
ENSG00000116701.10	NCF2	1_183580279_C_T_b37	rs2761559	3.8e-05	-0.16	Muscle - Skeletal
ENSG00000116701.10	NCF2	1_183580653_G_C_b37	rs2761561	3.8e-05	-0.16	Muscle - Skeletal
ENSG00000116701.10	NCF2	1_183582172_T_C_b37	rs2767315	3.8e-05	-0.16	Muscle - Skeletal
ENSG00000116701.10	NCF2	1_183584150_T_A_b37	rs12067848	3.8e-05	-0.16	Muscle - Skeletal
ENSG00000116701.10	NCF2	1_183097398_A_G_b37	rs4651143	3.8e-05	-0.19	Skin - Not Sun Exposed (Suprapubic)
ENSG00000116701.10	NCF2	1_183096253_T_TATA_b37	rs3831073	3.8e-05	-0.19	Skin - Not Sun Exposed (Suprapubic)
ENSG00000116701.10	NCF2	1_183079412_C_T_b37	rs2296290	3.8e-05	-0.19	Skin - Not Sun Exposed (Suprapubic)
ENSG00000116701.10	NCF2	1_183074582_T_C_b37	rs3768629	3.9e-05	-0.19	Skin - Not Sun Exposed (Suprapubic)
ENSG00000116701.10	NCF2	1_183063738_G_A_b37	rs7542640	3.9e-05	-0.19	Skin - Not Sun Exposed (Suprapubic)
ENSG00000116701.10	NCF2	1_183062450_T_C_b37	rs10911239	3.9e-05	-0.19	Skin - Not Sun Exposed (Suprapubic)
ENSG00000116701.10	NCF2	1_183062948_T_C_b37	rs10911240	3.9e-05	-0.19	Skin - Not Sun Exposed (Suprapubic)
ENSG00000116701.10	NCF2	1_183065183_C_T_b37	rs4491025	3.9e-05	-0.19	Skin - Not Sun Exposed (Suprapubic)
ENSG00000116701.10	NCF2	1_183066254_T_G_b37	rs6424885	3.9e-05	-0.19	Skin - Not Sun Exposed (Suprapubic)
ENSG00000116701.10	NCF2	1_183068505_C_G_b37	rs10752895	3.9e-05	-0.19	Skin - Not Sun Exposed (Suprapubic)
ENSG00000116701.10	NCF2	1_183072147_C_T_b37	rs10911242	3.9e-05	-0.19	Skin - Not Sun Exposed (Suprapubic)
ENSG00000116701.10	NCF2	1_183072908_T_C_b37	rs10797835	3.9e-05	-0.19	Skin - Not Sun Exposed (Suprapubic)
ENSG00000116701.10	NCF2	1_183073109_T_TTG_b37	rs397807317	3.9e-05	-0.19	Skin - Not Sun Exposed (Suprapubic)
ENSG00000116701.10	NCF2	1_183073407_C_A_b37	rs2027076	3.9e-05	-0.19	Skin - Not Sun Exposed (Suprapubic)
ENSG00000116701.10	NCF2	1_183074964_C_T_b37	rs2182020	3.9e-05	-0.19	Skin - Not Sun Exposed (Suprapubic)
ENSG00000116701.10	NCF2	1_183075017_T_C_b37	rs7414273	3.9e-05	-0.19	Skin - Not Sun Exposed (Suprapubic)
ENSG00000116701.10	NCF2	1_183075121_C_G_b37	rs10797837	3.9e-05	-0.19	Skin - Not Sun Exposed (Suprapubic)
ENSG00000116701.10	NCF2	1_183075415_G_A_b37	rs10911243	3.9e-05	-0.19	Skin - Not Sun Exposed (Suprapubic)
ENSG00000116701.10	NCF2	1_183075732_A_G_b37	rs12091137	3.9e-05	-0.19	Skin - Not Sun Exposed (Suprapubic)
ENSG00000116701.10	NCF2	1_183075778_T_C_b37	rs12086466	3.9e-05	-0.19	Skin - Not Sun Exposed (Suprapubic)
ENSG00000116701.10	NCF2	1_183076287_A_G_b37	rs723014	3.9e-05	-0.19	Skin - Not Sun Exposed (Suprapubic)
ENSG00000116701.10	NCF2	1_183076881_C_T_b37	rs10911246	3.9e-05	-0.19	Skin - Not Sun Exposed (Suprapubic)
ENSG00000116701.10	NCF2	1_183077020_A_G_b37	rs10797838	3.9e-05	-0.19	Skin - Not Sun Exposed (Suprapubic)
ENSG00000116701.10	NCF2	1_183077296_A_AG_b37	rs3835273	3.9e-05	-0.19	Skin - Not Sun Exposed (Suprapubic)
ENSG00000116701.10	NCF2	1_183077618_C_T_b37	rs3765522	3.9e-05	-0.19	Skin - Not Sun Exposed (Suprapubic)
ENSG00000116701.10	NCF2	1_183077797_T_C_b37	rs10797839	3.9e-05	-0.19	Skin - Not Sun Exposed (Suprapubic)
ENSG00000116701.10	NCF2	1_183078462_A_G_b37	rs3768626	3.9e-05	-0.19	Skin - Not Sun Exposed (Suprapubic)
ENSG00000116701.10	NCF2	1_183079252_C_T_b37	rs3768624	3.9e-05	-0.19	Skin - Not Sun Exposed (Suprapubic)
ENSG00000116701.10	NCF2	1_183079376_G_A_b37	rs3818417	3.9e-05	-0.19	Skin - Not Sun Exposed (Suprapubic)
ENSG00000116701.10	NCF2	1_183079509_C_T_b37	rs2296291	3.9e-05	-0.19	Skin - Not Sun Exposed (Suprapubic)
ENSG00000116701.10	NCF2	1_183080690_G_A_b37	rs10911249	3.9e-05	-0.19	Skin - Not Sun Exposed (Suprapubic)
ENSG00000116701.10	NCF2	1_183081131_G_A_b37	rs10797840	3.9e-05	-0.19	Skin - Not Sun Exposed (Suprapubic)
ENSG00000116701.10	NCF2	1_183081145_G_A_b37	rs10797841	3.9e-05	-0.19	Skin - Not Sun Exposed (Suprapubic)
ENSG00000116701.10	NCF2	1_183081241_T_G_b37	rs10752899	3.9e-05	-0.19	Skin - Not Sun Exposed (Suprapubic)
ENSG00000116701.10	NCF2	1_183081995_A_G_b37	rs10797843	3.9e-05	-0.19	Skin - Not Sun Exposed (Suprapubic)
ENSG00000116701.10	NCF2	1_183082067_C_T_b37	rs10797844	3.9e-05	-0.19	Skin - Not Sun Exposed (Suprapubic)
ENSG00000116701.10	NCF2	1_183082535_AT_A_b37	rs35831525	3.9e-05	-0.19	Skin - Not Sun Exposed (Suprapubic)
ENSG00000116701.10	NCF2	1_183090751_A_G_b37	rs2333621	3.9e-05	-0.19	Skin - Not Sun Exposed (Suprapubic)
ENSG00000116701.10	NCF2	1_183091796_G_C_b37	rs6424889	3.9e-05	-0.19	Skin - Not Sun Exposed (Suprapubic)
ENSG00000116701.10	NCF2	1_183091920_G_A_b37	rs4652776	3.9e-05	-0.19	Skin - Not Sun Exposed (Suprapubic)
ENSG00000116701.10	NCF2	1_183091963_C_T_b37	rs4651139	3.9e-05	-0.19	Skin - Not Sun Exposed (Suprapubic)
ENSG00000116701.10	NCF2	1_183092237_G_A_b37	rs3768620	3.9e-05	-0.19	Skin - Not Sun Exposed (Suprapubic)
ENSG00000116701.10	NCF2	1_183092404_C_G_b37	rs3768619	3.9e-05	-0.19	Skin - Not Sun Exposed (Suprapubic)
ENSG00000116701.10	NCF2	1_183092491_C_A_b37	rs3768618	3.9e-05	-0.19	Skin - Not Sun Exposed (Suprapubic)
ENSG00000116701.10	NCF2	1_183093875_T_C_b37	rs20557	3.9e-05	-0.19	Skin - Not Sun Exposed (Suprapubic)
ENSG00000116701.10	NCF2	1_183094191_T_C_b37	rs2093982	3.9e-05	-0.19	Skin - Not Sun Exposed (Suprapubic)
ENSG00000116701.10	NCF2	1_183094418_A_AC_b37	rs386368938	3.9e-05	-0.19	Skin - Not Sun Exposed (Suprapubic)
ENSG00000116701.10	NCF2	1_183094547_T_C_b37	rs20558	3.9e-05	-0.19	Skin - Not Sun Exposed (Suprapubic)
ENSG00000116701.10	NCF2	1_183095024_C_T_b37	rs1886499	3.9e-05	-0.19	Skin - Not Sun Exposed (Suprapubic)
ENSG00000116701.10	NCF2	1_183095048_G_A_b37	rs1886500	3.9e-05	-0.19	Skin - Not Sun Exposed (Suprapubic)
ENSG00000116701.10	NCF2	1_183095234_A_G_b37	rs1886501	3.9e-05	-0.19	Skin - Not Sun Exposed (Suprapubic)
ENSG00000116701.10	NCF2	1_183095477_G_A_b37	rs2296293	3.9e-05	-0.19	Skin - Not Sun Exposed (Suprapubic)
ENSG00000116701.10	NCF2	1_183095596_T_C_b37	rs2296294	3.9e-05	-0.19	Skin - Not Sun Exposed (Suprapubic)
ENSG00000116701.10	NCF2	1_183095765_A_G_b37	rs2224933	3.9e-05	-0.19	Skin - Not Sun Exposed (Suprapubic)
ENSG00000116701.10	NCF2	1_183096634_G_A_b37	rs1413390	3.9e-05	-0.19	Skin - Not Sun Exposed (Suprapubic)
ENSG00000116701.10	NCF2	1_183096668_C_T_b37	rs1413389	3.9e-05	-0.19	Skin - Not Sun Exposed (Suprapubic)
ENSG00000116701.10	NCF2	1_183096694_T_C_b37	rs1413388	3.9e-05	-0.19	Skin - Not Sun Exposed (Suprapubic)
ENSG00000116701.10	NCF2	1_183096880_A_G_b37	rs7529465	3.9e-05	-0.19	Skin - Not Sun Exposed (Suprapubic)
ENSG00000116701.10	NCF2	1_183096952_G_T_b37	rs4651140	3.9e-05	-0.19	Skin - Not Sun Exposed (Suprapubic)
ENSG00000116701.10	NCF2	1_183097382_T_G_b37	rs7549768	3.9e-05	-0.19	Skin - Not Sun Exposed (Suprapubic)
ENSG00000116701.10	NCF2	1_183097386_A_T_b37	rs4651142	3.9e-05	-0.19	Skin - Not Sun Exposed (Suprapubic)
ENSG00000116701.10	NCF2	1_183097421_A_G_b37	rs4651144	3.9e-05	-0.19	Skin - Not Sun Exposed (Suprapubic)
ENSG00000116701.10	NCF2	1_183098900_T_C_b37	rs4651145	3.9e-05	-0.19	Skin - Not Sun Exposed (Suprapubic)
ENSG00000116701.10	NCF2	1_183098964_T_TA_b37	rs397935301	3.9e-05	-0.19	Skin - Not Sun Exposed (Suprapubic)
ENSG00000116701.10	NCF2	1_183099701_G_A_b37	rs2296300	3.9e-05	-0.19	Skin - Not Sun Exposed (Suprapubic)
ENSG00000116701.10	NCF2	1_183099821_G_A_b37	rs6691755	3.9e-05	-0.19	Skin - Not Sun Exposed (Suprapubic)
ENSG00000116701.10	NCF2	1_183101038_A_G_b37	rs10752904	3.9e-05	-0.19	Skin - Not Sun Exposed (Suprapubic)
ENSG00000116701.10	NCF2	1_183101302_C_T_b37	rs10797852	3.9e-05	-0.19	Skin - Not Sun Exposed (Suprapubic)
ENSG00000116701.10	NCF2	1_183101686_G_A_b37	rs12095664	3.9e-05	-0.19	Skin - Not Sun Exposed (Suprapubic)
ENSG00000116701.10	NCF2	1_183102131_T_C_b37	rs10911258	3.9e-05	-0.19	Skin - Not Sun Exposed (Suprapubic)
ENSG00000116701.10	NCF2	1_183102855_T_C_b37	rs6666259	3.9e-05	-0.19	Skin - Not Sun Exposed (Suprapubic)
ENSG00000116701.10	NCF2	1_183103604_A_G_b37	rs3768615	3.9e-05	-0.19	Skin - Not Sun Exposed (Suprapubic)
ENSG00000116701.10	NCF2	1_183093028_A_T_b37	rs7518957	3.9e-05	-0.19	Skin - Not Sun Exposed (Suprapubic)
ENSG00000116701.10	NCF2	1_183080539_A_G_b37	rs6686682	3.9e-05	-0.19	Skin - Not Sun Exposed (Suprapubic)
ENSG00000116701.10	NCF2	1_183082421_C_A_b37	rs6669199	3.9e-05	-0.19	Skin - Not Sun Exposed (Suprapubic)
ENSG00000116701.10	NCF2	1_183100884_G_A_b37	rs10737245	3.9e-05	-0.19	Skin - Not Sun Exposed (Suprapubic)
ENSG00000116701.10	NCF2	1_183582249_A_G_b37	rs2767316	3.9e-05	-0.16	Muscle - Skeletal
ENSG00000116701.10	NCF2	1_183715357_G_T_b37	rs2148621	3.9e-05	0.11	Adipose - Subcutaneous
ENSG00000116701.10	NCF2	1_183698993_C_T_b37	rs7514445	3.9e-05	0.11	Adipose - Subcutaneous
ENSG00000116701.10	NCF2	1_183081867_G_A_b37	rs10797842	3.9e-05	-0.19	Skin - Not Sun Exposed (Suprapubic)
ENSG00000116701.10	NCF2	1_183096969_A_G_b37	rs4651141	3.9e-05	-0.19	Skin - Not Sun Exposed (Suprapubic)
ENSG00000116701.10	NCF2	1_182998036_T_A_b37	rs10911199	4e-05	-0.18	Skin - Not Sun Exposed (Suprapubic)
ENSG00000116701.10	NCF2	1_183091992_T_G_b37	rs4652777	4e-05	-0.19	Skin - Not Sun Exposed (Suprapubic)
ENSG00000116701.10	NCF2	1_183098001_A_G_b37	rs10797851	4e-05	-0.19	Skin - Not Sun Exposed (Suprapubic)
ENSG00000116701.10	NCF2	1_183021501_A_G_b37	rs10797823	4e-05	-0.18	Skin - Not Sun Exposed (Suprapubic)
ENSG00000116701.10	NCF2	1_183097956_G_GTTA_b37	rs71127335	4e-05	-0.19	Skin - Not Sun Exposed (Suprapubic)
ENSG00000116701.10	NCF2	1_183709348_C_T_b37	rs6658466	4e-05	0.11	Adipose - Subcutaneous
ENSG00000116701.10	NCF2	1_183709210_A_G_b37	rs10911428	4e-05	0.11	Adipose - Subcutaneous
ENSG00000116701.10	NCF2	1_183709692_C_G_b37	rs6658871	4e-05	0.11	Adipose - Subcutaneous
ENSG00000116701.10	NCF2	1_183710963_C_T_b37	rs7520083	4e-05	0.11	Adipose - Subcutaneous
ENSG00000116701.10	NCF2	1_183712910_AC_A_b37	rs34055777	4e-05	0.11	Adipose - Subcutaneous
ENSG00000116701.10	NCF2	1_183713927_T_C_b37	rs7539345	4e-05	0.11	Adipose - Subcutaneous
ENSG00000116701.10	NCF2	1_183714149_A_C_b37	rs7552115	4e-05	0.11	Adipose - Subcutaneous
ENSG00000116701.10	NCF2	1_183320192_C_T_b37	rs649614	4e-05	0.23	Artery - Tibial
ENSG00000116701.10	NCF2	1_183000148_G_A_b37	rs12037623	4e-05	-0.18	Skin - Not Sun Exposed (Suprapubic)
ENSG00000116701.10	NCF2	1_183641685_G_A_b37	rs1186452	4e-05	0.27	Cells - Transformed fibroblasts
ENSG00000116701.10	NCF2	1_183104947_T_C_b37	rs10752905	4e-05	-0.19	Skin - Not Sun Exposed (Suprapubic)
ENSG00000116701.10	NCF2	1_183277081_G_A_b37	rs869741	4.1e-05	-0.28	Skin - Sun Exposed (Lower leg)
ENSG00000116701.10	NCF2	1_183084229_C_T_b37	rs1537520	4.1e-05	-0.19	Skin - Not Sun Exposed (Suprapubic)
ENSG00000116701.10	NCF2	1_183581755_G_A_b37	rs2761566	4.1e-05	-0.16	Muscle - Skeletal
ENSG00000116701.10	NCF2	1_183627616_C_T_b37	rs1177778	4.1e-05	0.16	Esophagus - Mucosa
ENSG00000116701.10	NCF2	1_183323708_A_G_b37	rs564146	4.1e-05	0.23	Artery - Tibial
ENSG00000116701.10	NCF2	1_183325796_T_G_b37	rs502870	4.1e-05	0.23	Artery - Tibial
ENSG00000116701.10	NCF2	1_183707633_C_A_b37	rs7552887	4.1e-05	0.15	Muscle - Skeletal
ENSG00000116701.10	NCF2	1_183561517_T_C_b37	rs10911367	4.1e-05	-0.12	Adipose - Visceral (Omentum)
ENSG00000116701.10	NCF2	1_183145644_C_T_b37	rs16860425	4.2e-05	-0.32	Nerve - Tibial
ENSG00000116701.10	NCF2	1_183145694_A_T_b37	rs74721218	4.2e-05	-0.32	Nerve - Tibial
ENSG00000116701.10	NCF2	1_183148228_G_A_b37	rs16860429	4.2e-05	-0.32	Nerve - Tibial
ENSG00000116701.10	NCF2	1_183671283_A_G_b37	rs7543703	4.2e-05	-0.16	Esophagus - Mucosa
ENSG00000116701.10	NCF2	1_183704104_C_T_b37	rs7530552	4.2e-05	0.11	Adipose - Subcutaneous
ENSG00000116701.10	NCF2	1_183556620_T_C_b37	rs3903837	4.2e-05	-0.16	Muscle - Skeletal
ENSG00000116701.10	NCF2	1_183580827_G_A_b37	rs2761563	4.2e-05	-0.16	Muscle - Skeletal
ENSG00000116701.10	NCF2	1_183581038_G_T_b37	rs2476571	4.3e-05	0.16	Esophagus - Mucosa
ENSG00000116701.10	NCF2	1_182989568_T_TTCTC_b37	rs71573292	4.3e-05	-0.19	Skin - Not Sun Exposed (Suprapubic)
ENSG00000116701.10	NCF2	1_183670425_C_T_b37	rs1926837	4.4e-05	0.11	Adipose - Subcutaneous
ENSG00000116701.10	NCF2	1_183704400_T_G_b37	rs12734523	4.4e-05	0.11	Adipose - Subcutaneous
ENSG00000116701.10	NCF2	1_183075456_T_C_b37	rs2333622	4.4e-05	-0.19	Skin - Not Sun Exposed (Suprapubic)
ENSG00000116701.10	NCF2	1_183147850_C_G_b37	rs10494558	4.4e-05	-0.32	Nerve - Tibial
ENSG00000116701.10	NCF2	1_182970837_G_T_b37	rs4233192	4.4e-05	-0.19	Skin - Not Sun Exposed (Suprapubic)
ENSG00000116701.10	NCF2	1_183586329_G_A_b37	rs375178930	4.4e-05	0.16	Esophagus - Mucosa
ENSG00000116701.10	NCF2	1_183650701_G_A_b37	rs1174684	4.4e-05	0.32	Artery - Tibial
ENSG00000116701.10	NCF2	1_183005781_T_C_b37	rs10797818	4.4e-05	-0.18	Skin - Not Sun Exposed (Suprapubic)
ENSG00000116701.10	NCF2	1_183116366_C_CTA_b37	rs144964313	4.5e-05	-0.52	Skin - Sun Exposed (Lower leg)
ENSG00000116701.10	NCF2	1_183053131_C_T_b37	rs4397624	4.5e-05	-0.18	Skin - Not Sun Exposed (Suprapubic)
ENSG00000116701.10	NCF2	1_183013988_T_G_b37	rs10911209	4.6e-05	-0.19	Skin - Not Sun Exposed (Suprapubic)
ENSG00000116701.10	NCF2	1_183666920_G_A_b37	rs4507976	4.6e-05	0.11	Adipose - Subcutaneous
ENSG00000116701.10	NCF2	1_183085568_C_T_b37	rs6424887	4.6e-05	-0.19	Skin - Not Sun Exposed (Suprapubic)
ENSG00000116701.10	NCF2	1_183580826_T_C_b37	rs2761562	4.6e-05	-0.16	Muscle - Skeletal
ENSG00000116701.10	NCF2	1_183586330_C_T_b37	rs368090357	4.6e-05	0.16	Esophagus - Mucosa
ENSG00000116701.10	NCF2	1_183708428_G_A_b37	rs6703990	4.6e-05	-0.29	Cells - Transformed fibroblasts
ENSG00000116701.10	NCF2	1_183718530_T_A_b37	rs6684415	4.6e-05	-0.29	Cells - Transformed fibroblasts
ENSG00000116701.10	NCF2	1_183729184_C_CA_b37	rs34531055	4.6e-05	-0.29	Cells - Transformed fibroblasts
ENSG00000116701.10	NCF2	1_183729186_C_T_b37	rs35039854	4.6e-05	-0.29	Cells - Transformed fibroblasts
ENSG00000116701.10	NCF2	1_183097420_C_T_b37	rs4652778	4.7e-05	-0.19	Skin - Not Sun Exposed (Suprapubic)
ENSG00000116701.10	NCF2	1_183650701_G_A_b37	rs1174684	4.7e-05	0.29	Nerve - Tibial
ENSG00000116701.10	NCF2	1_183684635_G_GT_b37	rs397935294	4.7e-05	0.11	Adipose - Subcutaneous
ENSG00000116701.10	NCF2	1_183687001_A_G_b37	rs12145081	4.7e-05	0.11	Adipose - Subcutaneous
ENSG00000116701.10	NCF2	1_183682307_T_C_b37	rs6698736	4.7e-05	0.11	Adipose - Subcutaneous
ENSG00000116701.10	NCF2	1_183683749_C_G_b37	rs12119579	4.7e-05	0.11	Adipose - Subcutaneous
ENSG00000116701.10	NCF2	1_183703612_C_T_b37	rs12075254	4.7e-05	-0.3	Nerve - Tibial
ENSG00000116701.10	NCF2	1_183441977_C_T_b37	rs3905118	4.7e-05	-0.23	Artery - Tibial
ENSG00000116701.10	NCF2	1_183714485_T_TCA_b37	rs10678317	4.8e-05	0.15	Muscle - Skeletal
ENSG00000116701.10	NCF2	1_183648402_C_T_b37	rs1174681	4.8e-05	0.27	Cells - Transformed fibroblasts
ENSG00000116701.10	NCF2	1_183583892_A_G_b37	rs149830921	4.8e-05	-0.37	Artery - Tibial
ENSG00000116701.10	NCF2	1_183403017_G_C_b37	rs74505258	4.8e-05	-0.51	Skin - Sun Exposed (Lower leg)
ENSG00000116701.10	NCF2	1_183276903_G_T_b37	rs869740	4.8e-05	-0.29	Skin - Sun Exposed (Lower leg)
ENSG00000116701.10	NCF2	1_183715906_G_T_b37	rs12064656	4.9e-05	-0.3	Nerve - Tibial
ENSG00000116701.10	NCF2	1_183449357_C_T_b37	rs2226099	4.9e-05	-0.23	Artery - Tibial
ENSG00000116701.10	NCF2	1_183707633_C_A_b37	rs7552887	4.9e-05	0.11	Adipose - Subcutaneous
ENSG00000116701.10	NCF2	1_183580370_G_A_b37	rs2761560	4.9e-05	-0.15	Muscle - Skeletal
ENSG00000116701.10	NCF2	1_183581402_C_T_b37	rs2761565	5e-05	-0.15	Muscle - Skeletal
ENSG00000116701.10	NCF2	1_183706275_A_G_b37	rs10911427	5e-05	0.11	Adipose - Subcutaneous
ENSG00000116701.10	NCF2	1_183707103_A_G_b37	rs7529946	5e-05	0.11	Adipose - Subcutaneous
ENSG00000116701.10	NCF2	1_183707989_C_T_b37	rs12133760	5e-05	0.11	Adipose - Subcutaneous
ENSG00000116701.10	NCF2	1_183708921_T_C_b37	rs12760943	5e-05	0.11	Adipose - Subcutaneous
ENSG00000116701.10	NCF2	1_183352636_GC_G_b37	rs34743723	5e-05	-0.26	Skin - Sun Exposed (Lower leg)
ENSG00000116701.10	NCF2	1_183359879_C_T_b37	rs78316688	5e-05	-0.26	Skin - Sun Exposed (Lower leg)
ENSG00000116701.10	NCF2	1_183376980_G_T_b37	rs10494563	5e-05	-0.26	Skin - Sun Exposed (Lower leg)
ENSG00000116701.10	NCF2	1_183064074_C_CG_b37	rs397740079	5e-05	-0.18	Skin - Not Sun Exposed (Suprapubic)
ENSG00000116701.10	NCF2	1_183556395_T_C_b37	rs11588654	5e-05	0.17	Esophagus - Mucosa
ENSG00000116701.10	NCF2	1_183750649_C_T_b37	rs11581495	5.1e-05	-0.55	Nerve - Tibial
ENSG00000116701.10	NCF2	1_183044034_A_G_b37	rs10797832	5.2e-05	-0.18	Skin - Not Sun Exposed (Suprapubic)
ENSG00000116701.10	NCF2	1_183582830_G_A_b37	rs61811181	5.2e-05	0.16	Esophagus - Mucosa
ENSG00000116701.10	NCF2	1_183733752_T_C_b37	rs1926836	5.2e-05	-0.28	Cells - Transformed fibroblasts
ENSG00000116701.10	NCF2	1_183074875_C_T_b37	rs2147585	5.2e-05	-0.18	Skin - Not Sun Exposed (Suprapubic)
ENSG00000116701.10	NCF2	1_183268483_C_T_b37	rs147885904	5.2e-05	-0.26	Skin - Sun Exposed (Lower leg)
ENSG00000116701.10	NCF2	1_183564287_C_T_b37	rs10911368	5.3e-05	-0.15	Muscle - Skeletal
ENSG00000116701.10	NCF2	1_183714149_A_C_b37	rs7552115	5.3e-05	0.15	Muscle - Skeletal
ENSG00000116701.10	NCF2	1_183715357_G_T_b37	rs2148621	5.3e-05	0.15	Muscle - Skeletal
ENSG00000116701.10	NCF2	1_183593097_G_A_b37	rs57421480	5.3e-05	-0.34	Esophagus - Mucosa
ENSG00000116701.10	NCF2	1_183565740_CTACTAAAAATAG_C_b37	rs371019598	5.3e-05	-0.38	Artery - Tibial
ENSG00000116701.10	NCF2	1_183292291_T_G_b37	rs12046401	5.3e-05	-0.21	Skin - Not Sun Exposed (Suprapubic)
ENSG00000116701.10	NCF2	1_183292490_T_C_b37	rs12046463	5.3e-05	-0.21	Skin - Not Sun Exposed (Suprapubic)
ENSG00000116701.10	NCF2	1_183567676_A_G_b37	rs61685359	5.4e-05	-0.34	Nerve - Tibial
ENSG00000116701.10	NCF2	1_183340129_G_C_b37	rs526845	5.5e-05	0.24	Artery - Tibial
ENSG00000116701.10	NCF2	1_183705589_T_C_b37	rs12120527	5.5e-05	0.15	Muscle - Skeletal
ENSG00000116701.10	NCF2	1_183596136_A_G_b37	rs11755	5.5e-05	-0.15	Muscle - Skeletal
ENSG00000116701.10	NCF2	1_183572818_T_C_b37	rs76210171	5.5e-05	-0.4	Nerve - Tibial
ENSG00000116701.10	NCF2	1_183146375_C_T_b37	rs149153646	5.6e-05	-0.33	Nerve - Tibial
ENSG00000116701.10	NCF2	1_183584067_TTC_T_b37	rs113152065	5.6e-05	0.16	Esophagus - Mucosa
ENSG00000116701.10	NCF2	1_183697699_A_ATTGT_b37	rs397810926	5.7e-05	-0.28	Cells - Transformed fibroblasts
ENSG00000116701.10	NCF2	1_183583992_C_T_b37	rs75940660	5.7e-05	0.16	Esophagus - Mucosa
ENSG00000116701.10	NCF2	1_183583993_A_G_b37	rs75435975	5.7e-05	0.16	Esophagus - Mucosa
ENSG00000116701.10	NCF2	1_183618065_G_T_b37	rs12088609	5.8e-05	-0.34	Nerve - Tibial
ENSG00000116701.10	NCF2	1_183579379_G_A_b37	rs2761556	5.8e-05	0.16	Esophagus - Mucosa
ENSG00000116701.10	NCF2	1_183579585_T_A_b37	rs2767311	5.8e-05	0.16	Esophagus - Mucosa
ENSG00000116701.10	NCF2	1_183579911_A_G_b37	rs2767312	5.8e-05	0.16	Esophagus - Mucosa
ENSG00000116701.10	NCF2	1_183579973_C_T_b37	rs2761558	5.8e-05	0.16	Esophagus - Mucosa
ENSG00000116701.10	NCF2	1_183580279_C_T_b37	rs2761559	5.8e-05	0.16	Esophagus - Mucosa
ENSG00000116701.10	NCF2	1_183580653_G_C_b37	rs2761561	5.8e-05	0.16	Esophagus - Mucosa
ENSG00000116701.10	NCF2	1_183582172_T_C_b37	rs2767315	5.8e-05	0.16	Esophagus - Mucosa
ENSG00000116701.10	NCF2	1_183582249_A_G_b37	rs2767316	5.8e-05	0.16	Esophagus - Mucosa
ENSG00000116701.10	NCF2	1_183582765_A_G_b37	rs61811180	5.8e-05	0.16	Esophagus - Mucosa
ENSG00000116701.10	NCF2	1_183583021_T_C_b37	rs111610865	5.8e-05	0.16	Esophagus - Mucosa
ENSG00000116701.10	NCF2	1_183584159_G_A_b37	rs12062320	5.8e-05	0.16	Esophagus - Mucosa
ENSG00000116701.10	NCF2	1_183671385_G_A_b37	rs2148625	5.8e-05	-0.16	Esophagus - Mucosa
ENSG00000116701.10	NCF2	1_183583937_A_C_b37	rs75705092	5.8e-05	0.16	Esophagus - Mucosa
ENSG00000116701.10	NCF2	1_183583950_C_T_b37	rs78070601	5.8e-05	0.16	Esophagus - Mucosa
ENSG00000116701.10	NCF2	1_183706275_A_G_b37	rs10911427	5.9e-05	0.15	Muscle - Skeletal
ENSG00000116701.10	NCF2	1_183707103_A_G_b37	rs7529946	5.9e-05	0.15	Muscle - Skeletal
ENSG00000116701.10	NCF2	1_183707989_C_T_b37	rs12133760	5.9e-05	0.15	Muscle - Skeletal
ENSG00000116701.10	NCF2	1_183708921_T_C_b37	rs12760943	5.9e-05	0.15	Muscle - Skeletal
ENSG00000116701.10	NCF2	1_183122147_C_T_b37	rs12043149	5.9e-05	-0.35	Nerve - Tibial
ENSG00000116701.10	NCF2	1_183675169_T_C_b37	rs12739778	5.9e-05	0.11	Adipose - Subcutaneous
ENSG00000116701.10	NCF2	1_183676719_G_T_b37	rs12132735	5.9e-05	0.11	Adipose - Subcutaneous
ENSG00000116701.10	NCF2	1_183745579_G_C_b37	rs10157939	6e-05	-0.29	Nerve - Tibial
ENSG00000116701.10	NCF2	1_183750896_A_T_b37	rs10911434	6e-05	-0.29	Nerve - Tibial
ENSG00000116701.10	NCF2	1_183650380_C_G_b37	rs140224751	6.2e-05	0.11	Adipose - Subcutaneous
ENSG00000116701.10	NCF2	1_183421304_A_T_b37	rs34474108	6.2e-05	0.71	Artery - Tibial
ENSG00000116701.10	NCF2	1_183647995_G_A_b37	rs12724273	6.2e-05	0.11	Adipose - Subcutaneous
ENSG00000116701.10	NCF2	1_183554714_C_T_b37	rs34423782	6.2e-05	-0.35	Nerve - Tibial
ENSG00000116701.10	NCF2	1_183653691_A_G_b37	rs7520442	6.2e-05	0.11	Adipose - Subcutaneous
ENSG00000116701.10	NCF2	1_183119724_T_A_b37	rs76831965	6.3e-05	-0.35	Nerve - Tibial
ENSG00000116701.10	NCF2	1_183679912_C_T_b37	rs12746073	6.3e-05	0.11	Adipose - Subcutaneous
ENSG00000116701.10	NCF2	1_183586265_C_T_b37	rs201591467	6.3e-05	-0.11	Adipose - Subcutaneous
ENSG00000116701.10	NCF2	1_183707703_C_G_b37	rs7552987	6.3e-05	0.15	Muscle - Skeletal
ENSG00000116701.10	NCF2	1_183609654_A_G_b37	rs1174687	6.3e-05	-0.11	Adipose - Subcutaneous
ENSG00000116701.10	NCF2	1_183343362_A_G_b37	rs2485932	6.3e-05	0.22	Artery - Tibial
ENSG00000116701.10	NCF2	1_183647777_G_A_b37	rs1174680	6.3e-05	0.27	Cells - Transformed fibroblasts
ENSG00000116701.10	NCF2	1_183710374_A_T_b37	rs4489521	6.3e-05	0.11	Adipose - Subcutaneous
ENSG00000116701.10	NCF2	1_183704768_T_G_b37	rs12119590	6.4e-05	0.11	Adipose - Subcutaneous
ENSG00000116701.10	NCF2	1_183709210_A_G_b37	rs10911428	6.5e-05	0.15	Muscle - Skeletal
ENSG00000116701.10	NCF2	1_183709692_C_G_b37	rs6658871	6.5e-05	0.15	Muscle - Skeletal
ENSG00000116701.10	NCF2	1_183710963_C_T_b37	rs7520083	6.5e-05	0.15	Muscle - Skeletal
ENSG00000116701.10	NCF2	1_183712910_AC_A_b37	rs34055777	6.5e-05	0.15	Muscle - Skeletal
ENSG00000116701.10	NCF2	1_183711483_C_T_b37	rs3820689	6.5e-05	0.15	Muscle - Skeletal
ENSG00000116701.10	NCF2	1_183712506_C_CAAGAACTTCGA_b37	rs61514348	6.5e-05	-0.28	Cells - Transformed fibroblasts
ENSG00000116701.10	NCF2	1_183718763_G_A_b37	rs6671886	6.5e-05	-0.28	Cells - Transformed fibroblasts
ENSG00000116701.10	NCF2	1_183728476_C_G_b37	rs4132276	6.5e-05	-0.28	Cells - Transformed fibroblasts
ENSG00000116701.10	NCF2	1_183731104_A_T_b37	rs6673095	6.5e-05	-0.28	Cells - Transformed fibroblasts
ENSG00000116701.10	NCF2	1_183736732_G_A_b37	rs6666992	6.5e-05	-0.28	Cells - Transformed fibroblasts
ENSG00000116701.10	NCF2	1_183751004_C_T_b37	rs10797910	6.5e-05	-0.28	Cells - Transformed fibroblasts
ENSG00000116701.10	NCF2	1_183754706_T_C_b37	rs1952234	6.5e-05	-0.28	Cells - Transformed fibroblasts
ENSG00000116701.10	NCF2	1_183709348_C_T_b37	rs6658466	6.5e-05	0.15	Muscle - Skeletal
ENSG00000116701.10	NCF2	1_183725852_C_G_b37	rs2491428	6.6e-05	0.28	Cells - Transformed fibroblasts
ENSG00000116701.10	NCF2	1_183397087_A_G_b37	rs2702198	6.6e-05	0.24	Artery - Tibial
ENSG00000116701.10	NCF2	1_183715181_T_G_b37	rs2182593	6.7e-05	0.15	Muscle - Skeletal
ENSG00000116701.10	NCF2	1_183151895_C_A_b37	rs12024055	6.7e-05	-0.29	Nerve - Tibial
ENSG00000116701.10	NCF2	1_183579729_G_T_b37	rs34840421	6.7e-05	-0.15	Muscle - Skeletal
ENSG00000116701.10	NCF2	1_183554449_T_C_b37	rs699240	6.8e-05	-0.15	Muscle - Skeletal
ENSG00000116701.10	NCF2	1_183695313_G_T_b37	rs6424908	6.8e-05	0.15	Muscle - Skeletal
ENSG00000116701.10	NCF2	1_183671399_C_G_b37	rs2148626	6.8e-05	0.11	Adipose - Subcutaneous
ENSG00000116701.10	NCF2	1_183573228_G_A_b37	rs2767314	6.8e-05	-0.11	Adipose - Subcutaneous
ENSG00000116701.10	NCF2	1_183670898_C_T_b37	rs6424906	6.9e-05	0.11	Adipose - Subcutaneous
ENSG00000116701.10	NCF2	1_183667369_G_A_b37	rs7553722	6.9e-05	0.11	Adipose - Subcutaneous
ENSG00000116701.10	NCF2	1_183667858_G_A_b37	rs6701811	6.9e-05	0.11	Adipose - Subcutaneous
ENSG00000116701.10	NCF2	1_183668806_G_A_b37	rs12753772	6.9e-05	0.11	Adipose - Subcutaneous
ENSG00000116701.10	NCF2	1_183669380_T_C_b37	rs12133984	6.9e-05	0.11	Adipose - Subcutaneous
ENSG00000116701.10	NCF2	1_183670012_A_G_b37	rs12138300	6.9e-05	0.11	Adipose - Subcutaneous
ENSG00000116701.10	NCF2	1_183670529_A_G_b37	rs1926838	6.9e-05	0.11	Adipose - Subcutaneous
ENSG00000116701.10	NCF2	1_183670577_A_G_b37	rs1926839	6.9e-05	0.11	Adipose - Subcutaneous
ENSG00000116701.10	NCF2	1_183672052_T_C_b37	rs4517316	6.9e-05	0.11	Adipose - Subcutaneous
ENSG00000116701.10	NCF2	1_183672085_A_G_b37	rs4607832	6.9e-05	0.11	Adipose - Subcutaneous
ENSG00000116701.10	NCF2	1_183673327_T_C_b37	rs12729088	6.9e-05	0.11	Adipose - Subcutaneous
ENSG00000116701.10	NCF2	1_183674297_T_C_b37	rs6689503	6.9e-05	0.11	Adipose - Subcutaneous
ENSG00000116701.10	NCF2	1_183677332_T_C_b37	rs60771493	6.9e-05	0.11	Adipose - Subcutaneous
ENSG00000116701.10	NCF2	1_183677613_A_G_b37	rs2182596	6.9e-05	0.11	Adipose - Subcutaneous
ENSG00000116701.10	NCF2	1_183677873_C_G_b37	rs2182597	6.9e-05	0.11	Adipose - Subcutaneous
ENSG00000116701.10	NCF2	1_183676791_C_G_b37	rs12117797	6.9e-05	0.11	Adipose - Subcutaneous
ENSG00000116701.10	NCF2	1_183705975_G_T_b37	rs9645305	6.9e-05	-0.28	Cells - Transformed fibroblasts
ENSG00000116701.10	NCF2	1_183713733_C_A_b37	rs12738712	6.9e-05	0.15	Muscle - Skeletal
ENSG00000116701.10	NCF2	1_183669774_G_A_b37	rs12130947	6.9e-05	0.11	Adipose - Subcutaneous
ENSG00000116701.10	NCF2	1_183684569_G_A_b37	rs17559937	6.9e-05	0.11	Adipose - Subcutaneous
ENSG00000116701.10	NCF2	1_183670800_G_A_b37	rs6663585	6.9e-05	0.11	Adipose - Subcutaneous
ENSG00000116701.10	NCF2	1_183670811_T_C_b37	rs6424905	6.9e-05	0.11	Adipose - Subcutaneous
ENSG00000116701.10	NCF2	1_183589923_A_ATCTT_b37	rs57134356	7e-05	0.27	Cells - Transformed fibroblasts
ENSG00000116701.10	NCF2	1_183713927_T_C_b37	rs7539345	7e-05	0.15	Muscle - Skeletal
ENSG00000116701.10	NCF2	1_183587440_C_T_b37	rs2478761	7e-05	-0.15	Muscle - Skeletal
ENSG00000116701.10	NCF2	1_183265801_C_T_b37	rs12046529	7e-05	-0.26	Skin - Sun Exposed (Lower leg)
ENSG00000116701.10	NCF2	1_183135347_C_T_b37	rs141912705	7e-05	-0.35	Nerve - Tibial
ENSG00000116701.10	NCF2	1_183565989_T_C_b37	rs2333685	7.1e-05	0.27	Cells - Transformed fibroblasts
ENSG00000116701.10	NCF2	1_183714485_T_TCA_b37	rs10678317	7.2e-05	0.11	Adipose - Subcutaneous
ENSG00000116701.10	NCF2	1_183677511_C_T_b37	rs10911420	7.2e-05	0.16	Muscle - Skeletal
ENSG00000116701.10	NCF2	1_183667180_A_G_b37	rs4388653	7.3e-05	0.16	Muscle - Skeletal
ENSG00000116701.10	NCF2	1_183707595_A_C_b37	rs2491430	7.3e-05	0.28	Cells - Transformed fibroblasts
ENSG00000116701.10	NCF2	1_182986625_G_C_b37	rs55890322	7.4e-05	-0.46	Skin - Sun Exposed (Lower leg)
ENSG00000116701.10	NCF2	1_183565797_G_A_b37	rs2333684	7.4e-05	0.27	Cells - Transformed fibroblasts
ENSG00000116701.10	NCF2	1_183345452_T_G_b37	rs2811562	7.4e-05	0.24	Artery - Tibial
ENSG00000116701.10	NCF2	1_183566100_C_T_b37	rs2333686	7.6e-05	0.27	Cells - Transformed fibroblasts
ENSG00000116701.10	NCF2	1_183173781_T_TTAAAA_b37	rs143922518	8.7e-05	-0.29	Nerve - Tibial
ENSG00000116701.10	NCF2	1_183786081_G_GA_b37	rs140069137	8.9e-05	0.26	Skin - Sun Exposed (Lower leg)
ENSG00000116701.10	NCF2	1_183103653_T_A_b37	rs3768614	9e-05	-0.25	Nerve - Tibial

## Sheet: GTEx_NCF4
Gencode Id	Gene Symbol	Variant Id	SNP Id	P-Value	NES	Tissue
ENSG00000100365.10	NCF4	22_36586694_G_A_b37	rs28477415	1.3e-07	1.7	Pancreas
ENSG00000100365.10	NCF4	22_37258503_T_C_b37	rs4821544	3.2e-07	-0.2	Esophagus - Muscularis
ENSG00000100365.10	NCF4	22_37258503_T_C_b37	rs4821544	4e-07	-0.15	Adipose - Subcutaneous
ENSG00000100365.10	NCF4	22_37257712_C_A_b37	rs34421414	7.1e-07	-0.28	Nerve - Tibial
ENSG00000100365.10	NCF4	22_36926865_T_C_b37	rs74435444	8.1e-07	-1.2	Brain - Anterior cingulate cortex (BA24)
ENSG00000100365.10	NCF4	22_36926979_C_T_b37	rs79593534	8.1e-07	-1.2	Brain - Anterior cingulate cortex (BA24)
ENSG00000100365.10	NCF4	22_36935371_A_G_b37	rs190580500	8.1e-07	-1.2	Brain - Anterior cingulate cortex (BA24)
ENSG00000100365.10	NCF4	22_36941711_A_G_b37	rs118061391	8.1e-07	-1.2	Brain - Anterior cingulate cortex (BA24)
ENSG00000100365.10	NCF4	22_36941724_A_G_b37	rs117712792	8.1e-07	-1.2	Brain - Anterior cingulate cortex (BA24)
ENSG00000100365.10	NCF4	22_37258651_G_C_b37	rs9619637	9.5e-07	-0.24	Esophagus - Muscularis
ENSG00000100365.10	NCF4	22_37357169_C_T_b37	rs4821576	1.5e-06	0.49	Liver
ENSG00000100365.10	NCF4	22_37258986_C_T_b37	rs760517	2e-06	-0.13	Skin - Sun Exposed (Lower leg)
ENSG00000100365.10	NCF4	22_37258503_T_C_b37	rs4821544	2.7e-06	-0.21	Heart - Atrial Appendage
ENSG00000100365.10	NCF4	22_37258503_T_C_b37	rs4821544	3.4e-06	-0.17	Esophagus - Mucosa
ENSG00000100365.10	NCF4	22_36569220_T_C_b37	rs555829001	4.4e-06	0.68	Adipose - Visceral (Omentum)
ENSG00000100365.10	NCF4	22_37563388_A_G_b37	rs229495	4.5e-06	0.99	Brain - Nucleus accumbens (basal ganglia)
ENSG00000100365.10	NCF4	22_37249449_A_G_b37	rs56366618	5.1e-06	-0.25	Nerve - Tibial
ENSG00000100365.10	NCF4	22_37258503_T_C_b37	rs4821544	5.1e-06	-0.3	Adrenal Gland
ENSG00000100365.10	NCF4	22_37257177_G_A_b37	rs34567417	5.3e-06	-0.27	Nerve - Tibial
ENSG00000100365.10	NCF4	22_36569229_CCA_C_b37		5.4e-06	0.75	Adipose - Visceral (Omentum)
ENSG00000100365.10	NCF4	22_36569234_C_CAT_b37		5.6e-06	0.75	Adipose - Visceral (Omentum)
ENSG00000100365.10	NCF4	22_37258503_T_C_b37	rs4821544	5.8e-06	-0.13	Lung
ENSG00000100365.10	NCF4	22_36569219_C_T_b37	rs566320732	6.4e-06	0.74	Adipose - Visceral (Omentum)
ENSG00000100365.10	NCF4	22_37258986_C_T_b37	rs760517	6.9e-06	-0.19	Heart - Atrial Appendage
ENSG00000100365.10	NCF4	22_37258503_T_C_b37	rs4821544	7e-06	-0.16	Artery - Aorta
ENSG00000100365.10	NCF4	22_36925382_C_T_b37	rs55987373	7.4e-06	-1	Brain - Anterior cingulate cortex (BA24)
ENSG00000100365.10	NCF4	22_36926067_G_A_b37	rs56208749	7.4e-06	-1	Brain - Anterior cingulate cortex (BA24)
ENSG00000100365.10	NCF4	22_36927807_T_A_b37	rs60531878	7.4e-06	-1	Brain - Anterior cingulate cortex (BA24)
ENSG00000100365.10	NCF4	22_36927750_A_G_b37	rs55893175	7.8e-06	-1	Brain - Anterior cingulate cortex (BA24)
ENSG00000100365.10	NCF4	22_37256476_G_A_b37	rs10854694	9.3e-06	0.13	Adipose - Subcutaneous
ENSG00000100365.10	NCF4	22_37258986_C_T_b37	rs760517	1e-05	-0.15	Esophagus - Mucosa
ENSG00000100365.10	NCF4	22_36886199_C_G_b37	rs35748020	1.1e-05	-2.3	Brain - Cerebellar Hemisphere
ENSG00000100365.10	NCF4	22_37258986_C_T_b37	rs760517	1.2e-05	-0.12	Lung
ENSG00000100365.10	NCF4	22_37258651_G_C_b37	rs9619637	1.2e-05	-0.15	Lung
ENSG00000100365.10	NCF4	22_37258986_C_T_b37	rs760517	1.5e-05	-0.12	Adipose - Subcutaneous
ENSG00000100365.10	NCF4	22_37256846_G_A_b37	rs1883112	1.7e-05	0.13	Adipose - Subcutaneous
ENSG00000100365.10	NCF4	22_37256262_G_A_b37	rs11089806	2e-05	0.13	Adipose - Subcutaneous
ENSG00000100365.10	NCF4	22_37212945_G_T_b37	rs118169194	2.7e-05	-0.23	Artery - Tibial
ENSG00000100365.10	NCF4	22_37258986_C_T_b37	rs760517	3.1e-05	-0.16	Esophagus - Muscularis

[truncated: 5 more sheets: GTEx_NRF2, GTEx_SOD1, GTEx_TXN, GTEx_TXNRD1, SNPs at LD]
